# Supplementary material for: Phosphine-free pincer-ruthenium catalyzed biofuel production: high rates, yields and turnovers of solventless alcohol alkylation
Source: Royal Society of Chemistry journal article supplement (doi:10.1039/d0cy01679a), 2020-01-01
Supplement: d0cy01679a1.pdf [file d0cy01679a1.pdf]

## Phosphine-free pincer–ruthenium catalyzed biofuel production: high rates, yields and turnovers of solventless alcohol alkylation

Kanu Das,<sup>a</sup> Eileen Yasmin,<sup>a</sup> Babulal Das,<sup>a</sup> Hemant Kumar Srivastava,<sup>\*b</sup> Akshai Kumar<sup>\*a,c</sup>

<sup>a</sup> Department of Chemistry, Indian Institute of Technology Guwahati, Guwahati – 781039, Assam, India. Email: [akshaikumar@iitg.ac.in](mailto:akshaikumar@iitg.ac.in)

<sup>b</sup> Department of Medicinal Chemistry, National Institute of Pharmaceutical Education and Research Guwahati, Guwahati – 781101, Assam, India.  
Email: [srivastava.hk@niperguwahati.ac.in](mailto:srivastava.hk@niperguwahati.ac.in)

<sup>c</sup> Centre for Nanotechnology, Indian Institute of Technology Guwahati, Guwahati – 781039, Assam, India.

### Table of Contents

|          |                                                 |           |
|----------|-------------------------------------------------|-----------|
| <b>1</b> | <b>Experimental Section</b>                     | <b>2</b>  |
| <b>2</b> | <b>Crystallographic data and parameters</b>     | <b>5</b>  |
| <b>3</b> | <b>Optimization Tables, Figures and Schemes</b> | <b>7</b>  |
| <b>4</b> | <b>NMR, Mass, and IR Spectra</b>                | <b>12</b> |
| <b>5</b> | <b>Kinetic Studies</b>                          | <b>40</b> |
| <b>6</b> | <b>Computational study</b>                      | <b>51</b> |
| <b>7</b> | <b>References</b>                               | <b>71</b> |

## 1. Experimental Section

**General Methods and Materials.** All manipulations were carried out under purified Ar using a standard double manifold or a glove box. The solvents such as tetrahydrofuran (THF), hexane and toluene were dried via double distillation over Na/Benzophenone prior to experiment.<sup>[1]</sup> Ethanol was dried and distilled under argon according to literature procedure.<sup>[1]</sup> All other compounds including pyridine-2,6-dicarboxylic acid, *o*-phenylenediamine, [RuCl<sub>2</sub>(*p*-cymene)]<sub>2</sub>, and CDCl<sub>3</sub> were purchased either from MERCK or Sigma-Aldrich and use as such. The complexes (**1a–e**) were prepared according to literature procedure.<sup>[2]</sup>

**Physical Measurements.** <sup>1</sup>H, <sup>13</sup>C, <sup>31</sup>P NMR were recorded either on Bruker ASCEND 600 operating at 600 MHz for <sup>1</sup>H, 150 MHz for <sup>13</sup>C, 564 MHz for <sup>31</sup>P or on Bruker AVANCE 400 operating at 400 MHz for <sup>1</sup>H, 100 MHz for <sup>13</sup>C, 376 MHz for <sup>31</sup>P. The mass analysis was done using an Agilent Accurate-Mass Q-ToFF ESI-MS 6520. Fourier Transform Infrared (FT-IR) were recorded on Perkin Elmer Spectrum Two FT-IR spectrometer at room temperature with the region 400-4000 cm<sup>-1</sup>. X-ray crystallographic data were collected on Bruker Nonius Smart Apex III x-ray Single crystal diffractometer (CCD) with graphite - monochromatized Mo-K $\alpha$  radiation. The data refinements and cell reduction were carried out using Bruker Apex III program. Structures were solved and further refined by full matrix least-squares method using SHELXS-14.<sup>[3]</sup> GC analyses were performed on a Agilent 7820-GC instrument fitted with Agilent Front SS7 enlet N2 HP5 column (30 m length, 0.32 mm ID) using the following method: Agilent 7820-GC Detector: FID starting temperature: 60 °C; Time at starting temp: 0 min; Ramp: 40 °C/min up to 300 °C with hold time = 4 min; Flow rate (carrier): 25 mL/min (N<sub>2</sub>); Split ratio: 195; Inlet temperature: 250 °C; Detector temperature: 300 °C

**Synthesis of 2,6-bis(1H-benzimidazol-2-yl)pyridine (3e).** To a two-necked round bottom flask (100 mL) containing pyridine-2,6-dicarboxylic acid (0.084 g, 0.5 mmol) and *o*-phenylenediamine (0.108g, 1.0 mmol), orthophosphoric acid (10 mL) was added. The reaction mixture was heated overnight at 150 °C. A bluish green precipitate was obtained to which sodium bicarbonate solution (10 mL) was added. The residue was filtered and washed with water. The product was crystallized in methanol to obtain 0.135 g of an off-white solid in 74% yield. <sup>1</sup>H NMR (400 MHz, DMSO-*d*<sub>6</sub>)  $\delta$  = 12.99 (s, 2H), 8.34 (d, *J* = 7.8 Hz, 2H), 8.17 (t, *J* = 9.0 Hz, 1H), 7.78 (d, *J* = 8.0 Hz, 2H), 7.73 (d, *J* = 7.9 Hz, 2H), 7.35 (t, *J* = 7.5 Hz, 2H), 7.28 (t, *J* = 7.6 Hz, 2H). <sup>13</sup>C NMR (101 MHz, DMSO-*d*<sub>6</sub>)  $\delta$  = 149.98, 147.23, 143.67, 138.70, 133.87, 123.24, 121.71, 120.88, 119.23, 111.27. HRMS (ESI): *m/z* calculated for [3e+H]<sup>+</sup> Calculated = 312.1243, Found = 312.1413.

**Synthesis of 2,6-bis(1-methyl-1H-benzo[d]imidazol-2-yl)pyridine (3f).** To a round bottom flask (50 mL) containing **3e** (0.100g, 0.32 mmol) and KOH (0.090, 1.60 mmol), acetone (10 mL) was added and stirred for 15 minutes. Subsequently, methyl iodide (0.2 mL, 3.2 mmol) was added in dropwise fashion. The reaction was stirred at room temperature for additional 3 hours. The reaction mixture was poured into water (50 mL) and the resulting white precipitate was filtered. The residue was dried and recrystallized in methanol (off white solid, 0.098g, 90% yield). <sup>1</sup>H NMR (400 MHz, DMSO-*d*<sub>6</sub>)  $\delta$  = 8.40 (d, *J* = 7.7 Hz, 2H), 8.22 (t, *J* = 7.6 Hz, 1H), 7.77 (d, *J* = 8.0 Hz, 2H), 7.70 (d, *J* = 8.0 Hz, 2H), 7.34 (dt, *J* = 24.4, 7.3 Hz, 4H), 4.27 (s, 6H). <sup>13</sup>C {<sup>1</sup>H} NMR (101 MHz, DMSO-*d*<sub>6</sub>)  $\delta$  = 149.73, 149.30, 142.10, 138.54, 137.10, 125.05, 123.32, 122.51, 119.52, 110.92, 32.56. HRMS (ESI): *m/z* calculated for [3f+H]<sup>+</sup> Calculated = 340.1556, Found = 340.1585.

**Synthesis of [(<sup>Me</sup>Bim<sup>2</sup>NNN)RuCl(PPh<sub>3</sub>)<sub>2</sub>]Cl (1f).** To a two-necked round bottom flask (25 mL) containing 2,6-bis(1-methyl-1H-benzo[d]imidazol-2-yl)pyridine (0.07g, 0.206 mmol) and RuCl<sub>2</sub>(PPh<sub>3</sub>)<sub>3</sub> (0.200g, 0.207 mmol), dry THF (5mL) was added under argon atmosphere. The reaction mixture was then refluxed for 12 h under argon. During the reaction, the color of the reaction mixture changed from brown to light pink. Subsequently, the solvent was evaporated under reduced pressure to obtain a dark pink colored gel. The residue was washed with dry diethyl ether (3 x 5 mL) followed by hexane (3 x 5 mL). A pink color solid (0.135g) was obtained in 83% yield. <sup>1</sup>H NMR (600 MHz, CDCl<sub>3</sub>)  $\delta$  = 8.76 (s, 2H), 8.40 (s, 1H), 8.27 (s, 1H), 8.00 (s, 1H), 7.84 (s, 1H), 7.67 (dd, *J* = 11.7, 7.8 Hz, 5H), 7.57 – 7.52 (m, 4H), 7.47 (t, *J* = 6.3 Hz, 5H), 7.39 (s, 3H), 7.08 (d, *J* = 44.4 Hz, 15H), 6.84 (s, 9H), 3.72 (d, *J* = 17.4 Hz, 6H).

$^{31}\text{P}\{^1\text{H}\}$  NMR (243 MHz,  $\text{CDCl}_3$ )  $\delta = 29.29, (1\text{P}) 23.27 (1\text{P})$ . HRMS (ESI):  $m/z$  calculated for  $[\mathbf{1f}\text{-Cl}]^+$  Calculated = 1000.2039, Found = 1000.2236.

**General procedure for the synthesis of ( $\text{R}^2\text{NNN}$ ) $\text{RuCl}_2(\text{CO})$  (**2a**;  $\text{R} = \text{'Bu}$ , **2b**;  $\text{R} = \text{Cy}$ , **2c**;  $\text{R} = \text{'Pr}$  and **2d**;  $\text{R} = \text{Ph}$ ).** In a two-necked round bottom flask (25 mL), the ligand **3b** (0.030 g 0.100 mmol) and  $[\text{RuCl}_2(p\text{-Cymene})]_2$  (0.031 g, 0.050 mmol) were taken in dry THF (5 mL) under argon atmosphere. The reaction mixture was heated at 60 °C for 2h under argon atmosphere. Subsequently, the reaction mixture was further heated for another 10 h under an atmosphere of CO. The color of the reaction mixture changed from brown to dark greenish brown. This was followed by solvent evaporation to yield a dark green color solid which was washed by dry diethyl ether (3 x 5 mL) followed by hexane (2 x 5 mL) to yield 0.140 g of **2b** as a green color solid in 85% yield.

( $^{\text{tBu}2}\text{NNN}$ ) $\text{RuCl}_2(\text{CO})$  (**2a**). (0.044 g) 81% Yield.  $^1\text{H}$  NMR (400 MHz,  $\text{CDCl}_3$ )  $\delta = 8.07$  (s, 1H), 8.02 (s, 1H), 7.97 – 7.87 (m, 1H), 7.74 (dd,  $J = 16.4, 7.9$  Hz, 2H), 1.61 (s, 9H), 1.52 (s, 9H).  $^{13}\text{C}$  NMR (101 MHz,  $\text{CDCl}_3$ )  $\delta = 207.24, 161.20, 160.27, 159.13, 156.36, 138.99, 136.28, 126.25, 124.89, 68.27, 68.13, 29.91, 29.58$ . HRMS (ESI):  $m/z$  calculated for  $[\mathbf{2a}\text{-Cl}]^+$  Calculated = 410.0605, Found = 410.0610;  $m/z$  calculated for  $[\mathbf{2a}\text{-Cl}+\text{CH}_3\text{CN}]^+$  Calculated = 451.0871, Found = 451.0877. IR ( $\text{cm}^{-1}$ ):  $\nu = 2974, 2930, 2869, 2057, 1995, 1934$  (s), 1602, 1584, 1462, 1424, 1395, 1372, 1237, 1191, 1157, 1072, 1039, 1026, 928, 808, 774, 753, 610, 585, 574, 507, 484, 407.

( $^{\text{Cy}2}\text{NNN}$ ) $\text{RuCl}_2(\text{CO})$  (**2b**).  $^1\text{H}$  NMR (600 MHz,  $\text{CDCl}_3$ )  $\delta = 8.09$  (s, 2H), 7.88 (t,  $J = 7.7$  Hz, 1H), 7.67 (d,  $J = 7.8$  Hz, 2H), 3.62 (t,  $J = 11.2$  Hz, 2H), 2.07 – 1.23 (m, 20H).  $^{13}\text{C}$  NMR (151 MHz,  $\text{CDCl}_3$ )  $\delta = 205.21, 161.03, 155.99, 138.84, 123.97, 75.94, 33.44, 25.37, 25.02$ . HRMS (ESI):  $m/z$  calculated for  $[\mathbf{2b}\text{-Cl}]^+$  Calculated = 462.0918, Found = 462.0907;  $m/z$  calculated for  $[\mathbf{2b}\text{-Cl}+\text{CH}_3\text{CN}]^+$  Calculated = 503.1184, Found = 503.1164. IR ( $\text{cm}^{-1}$ ):  $\nu = 2924, 2853, 2056, 1944$  (s), 1936 (s), 1739, 1606, 1542, 1461, 1449, 1425, 1345, 1261, 1161, 1149, 1085, 1075, 1056, 1025, 972, 891, 856, 803, 753, 699, 686, 559, 523, 517, 488, 471, 435.

( $^{\text{tPr}2}\text{NNN}$ ) $\text{RuCl}_2(\text{CO})$  (**2c**): (0.046 g) 80% Yield.  $^1\text{H}$  NMR (400 MHz,  $\text{CDCl}_3$ )  $\delta = 8.14$  (s, 2H), 7.93 (t,  $J = 7.9$  Hz, 1H), 7.70 (d,  $J = 7.9$  Hz, 2H), 4.03 (hept,  $J = 6.4$  Hz, 2H), 1.51 (d,  $J = 6.4$  Hz, 12H).  $^{13}\text{C}$  NMR (101 MHz,  $\text{CDCl}_3$ )  $\delta = 205.10, 161.05, 156.03, 138.94, 124.10, 68.26, 23.17$ . HRMS (ESI):  $m/z$  calculated for  $[\mathbf{2c}\text{-Cl}]^+$  Calculated = 382.0292, Found = 382.0283;  $m/z$  calculated for  $[\mathbf{2c}\text{-Cl}+\text{CH}_3\text{CN}]^+$  Calculated = 423.0558, Found = 423.0556. IR ( $\text{cm}^{-1}$ ):  $\nu = 2987, 2987, 2973, 2931, 2895, 2059, 1995, 1952$  (s), 1604, 1469, 1447, 1423, 1398, 1382, 1367, 1327, 1273, 1163, 1144, 1121, 934, 913, 810, 797, 751, 606, 570, 482, 446.

( $^{\text{Ph}2}\text{NNN}$ ) $\text{RuCl}_2(\text{CO})$  (**2d**): Yield 80%. Low solubility posed challenges in NMR characterization. HRMS (ESI):  $m/z$  calculated for  $[\mathbf{2d}\text{-Cl}]^+$  Calculated = 449.9947, Found = 449.9998. IR ( $\text{cm}^{-1}$ ):  $\nu = 3060, 2866, 2977, 2062, 1954$  (s), 1604, 1584, 1523, 1485, 1453, 1417, 1348, 1315, 1271, 1191, 1163, 1075, 1064, 1053, 1027, 1001, 938, 917, 904, 800, 763, 748, 697, 597, 579, 564, 542, 506, 461, 432.

**General procedure for the synthesis of **2e** and **2f**.** To a two-necked round bottom flask (25 mL) containing ligand **3e** (0.025 g 0.08 mmol) and  $[\text{RuCl}_2(p\text{-Cymene})]_2$  (0.025 g, 0.04 mmol), dry THF (5 mL) was added under argon atmosphere. The reaction mixture was heated at 60 °C for 2 h under argon atmosphere. Subsequently an atmosphere of CO was introduced and the reaction mixture was further heated another 10 h. During the course of the reaction, the color of the reaction mixture changed from brown to straw color. Solvent evaporation yielded a dark green solid which upon washing with dry diethyl ether (3 x 5 mL) followed by hexane (2 x 5 mL) gave 0.037 g of **2e** as an orange yellowish solid in 74 % yield.

( $^{\text{Bim}2}\text{NNN}$ ) $\text{RuCl}_2(\text{CO})$  (**2e**). Low solubility posed challenges in NMR characterization. IR ( $\text{cm}^{-1}$ ):  $\nu = 3448$  (br), 3053 (br), 2062, 1965 (s), 1605, 1591, 1494, 1487, 1458, 1379, 1346, 1320, 1278, 1233, 1174, 1118, 1022, 996, 912, 849, 809, 761, 746, 674, 634, 596, 583, 572, 492, 434, 415. HRMS (ESI):  $m/z$  calculated for  $[\mathbf{2e}\text{-Cl}]^+$  Calculated = 475.8952, Found = 475.0000.

( $^{\text{MeBim}2}\text{NNN}$ ) $\text{RuCl}_2(\text{CO})$  (**2f**). (0.038 g) 71%, Low solubility posed challenges in NMR characterization. IR ( $\text{cm}^{-1}$ ):  $\nu = 1939, 1598, 1508, 1473, 1420, 1337, 1255, 1162, 1009, 866, 813, 801, 772, 758, 739, 602,$

492, 435. HRMS (ESI):  $m/z$  calculated for  $[2\mathbf{f}\text{-Cl}]^+$  Calculated = 504.0165, Found = 504.0289;  $m/z$  calculated for  $[2\mathbf{f}\text{-Cl}+\text{CH}_3\text{CN}]^+$  Calculated = 545.0431, Found = 545.0539.

**General procedure for alkylation reaction:** In a 25 mL two necked round bottom flask, 1-phenyl ethanol or benzyl alcohol were taken under argon atmosphere. This was followed by addition of 5 mol % of NaOH and 0.00025 mol % of **2b** (from a stock solution either in 1-phenyl ethanol or benzyl alcohol). After the addition, the reaction mixture contained 0.5 mL (4.14 mmol) of 1-phenyl ethanol, 0.43 mL (4.14 mmol) of benzyl alcohol, 8 mg (0.21 mmol) of NaOH and 1 mg (20  $\mu\text{mol}$ ) of **2b**. The mixture was heated at 140 °C for 20 h under Ar. The reaction mixture was then cooled to room temperature followed by addition of toluene as an internal standard. The yield was determined by  $^1\text{H}$  NMR spectroscopy.

**General procedure for Guerbet reaction:** A 5 mL Schlenk flask was charged with **2e** (1.8 mg, 4.28  $\mu\text{mol}$ ), ethanol (0.5 mL, 8.56 mmol) and of NaOEt (58 mg, 0.86 mmol). The volume was made up to 0.7 mL by using toluene which is used as an internal standard. The vessel was sealed and the reaction mixture was heated at 140 °C for 72 h. At regular intervals, an aliquot was taken out and the products were analyzed by GC.

**Computational methodology:** The geometries of all the considered complexes were fully optimized using the DFT (PBEPBE)<sup>[4]</sup> method on the Gaussian-16 program package.<sup>[5]</sup> The LANL2DZ<sup>[6]</sup> and 6-311G(d,p) basis set was used respectively for the metal (Ru) and non-metal atoms. Genecp (gen keyword with the effective core potential) was included to define the basis set. Method and basis set was selected on the basis of previous reports on pincer complexes. Frequency calculations characterize the obtained stationary points as minima structures or transition states based on the number of imaginary frequencies. Single point calculations were performed to calculate the relative free energy values at 140 °C.



## 2. Crystallographic data and parameters

**Table S1a:** Crystallography data of complexes **2b** and **2c**

| Name                                       | <b>2b</b>                                                                                     | <b>2c</b>                                                                                     |
|--------------------------------------------|-----------------------------------------------------------------------------------------------|-----------------------------------------------------------------------------------------------|
| Empirical formula                          | C <sub>43</sub> H <sub>60</sub> Cl <sub>4</sub> N <sub>6</sub> O <sub>5</sub> Ru <sub>2</sub> | C <sub>14</sub> H <sub>21</sub> Cl <sub>2</sub> N <sub>3</sub> O <sub>2</sub> Ru <sub>2</sub> |
| Formula weight                             | 1084.91                                                                                       | 435.31                                                                                        |
| Crystal size (mm <sup>3</sup> )            | 0.27 x 0.25 x 0.24                                                                            | 0.28 x 0.26 x 0.21                                                                            |
| Crystal system                             | Monoclinic                                                                                    | Monoclinic                                                                                    |
| Space group                                | P2 <sub>1</sub> /n                                                                            | P2 <sub>1</sub> /c                                                                            |
| a (Å)                                      | 12.5519(9)                                                                                    | 9.2304(5)                                                                                     |
| b (Å)                                      | 23.6646(18)                                                                                   | 10.8098(6)                                                                                    |
| c (Å)                                      | 16.9746(12)                                                                                   | 18.2395(11)                                                                                   |
| α (deg)                                    | 90.00                                                                                         | 90.00                                                                                         |
| β (deg)                                    | 94.020(2)                                                                                     | 96.278(2)                                                                                     |
| γ (deg)                                    | 90.00                                                                                         | 90.00                                                                                         |
| V (Å <sup>3</sup> )                        | 5029.7(6)                                                                                     | 1809.00(18)                                                                                   |
| Z                                          | 4                                                                                             | 4                                                                                             |
| ρ <sub>calc</sub> (g cm <sup>-3</sup> )    | 1.438                                                                                         | 1.598                                                                                         |
| μ (M <sub>0</sub> Kα) (mm <sup>-1</sup> )  | 0.859                                                                                         | 1.170                                                                                         |
| F (000)                                    | 2178.0                                                                                        | 726.0                                                                                         |
| T(K)                                       | 296(2)                                                                                        | 296(2)                                                                                        |
| Range of indices (h; k; l)                 | -14, 14; -28, 28; -20, 20                                                                     | -10, 10; -12, 12; -21, 21                                                                     |
| Number of reflection collected             | 166251                                                                                        | 72376                                                                                         |
| Unique reflection                          | 8853                                                                                          | 3184                                                                                          |
| Completeness to 2θ                         | 99.9                                                                                          | 99.6                                                                                          |
| R <sub>int</sub>                           | 0.1575                                                                                        | 0.2104                                                                                        |
| Data / restraints / parameters             | 8853/0/549                                                                                    | 3184/0/206                                                                                    |
| goodness-of-fit                            | 0.925                                                                                         | 1.042                                                                                         |
| R <sub>1</sub> [I ≥ 2σ(I)]                 | 0.0672                                                                                        | 0.0376                                                                                        |
| wR <sub>2</sub> [I ≥ 2σ(I)]                | 0.1315                                                                                        | 0.0872                                                                                        |
| R <sub>1</sub> (all data)                  | 0.0989                                                                                        | 0.0455                                                                                        |
| wR <sub>2</sub> (all data)                 | 0.1572                                                                                        | 0.0939                                                                                        |
| Δ <sub>r</sub> (max, min) e Å <sup>3</sup> | 0.85/-0.49                                                                                    | 0.49/-1.31                                                                                    |

**Table S1b:** Selective bond distance (Å) and bond angle (°) around the metal center of complexes **2b** and **2c**.

|                                   | <b>2b</b>        | <b>2c</b>   |
|-----------------------------------|------------------|-------------|
| <b>Ru–N</b> (Å)                   | 2.016 (6) Unit 1 |             |
| (Pyridine)                        | 2.014 (5) Unit 2 | 2.008 (3)   |
| <b>Ru–N</b> (Å)                   | 2.088 (6) Unit 1 |             |
| (Imine)                           | 2.099 (7) Unit 1 | 2.106 (3)   |
|                                   | 2.103 (6) Unit 2 | 2.096 (3)   |
|                                   | 2.100 (6) Unit 2 |             |
| <b>Ru–Cl</b> (Å)                  | 2.397 (2) Unit 1 |             |
|                                   | 2.402 (2) Unit 1 | 2.3945 (9)  |
|                                   | 2.391 (2) Unit 2 | 2.3948 (9)  |
|                                   | 2.403 (2) Unit 2 |             |
| <b>Ru–C</b> (Å)                   | 1.864 (8) Unit 1 |             |
| (Carbonyl carbon)                 | 1.870 (8) Unit 2 | 1.854 (4)   |
| <b>C≡O</b> (Å)                    | 1.143 (9) Unit 1 |             |
| (Carbonyl carbon-oxygen)          | 1.126 (9) Unit 2 | 1.141 (5)   |
| (Imine) <b>N–Ru–N</b> (Imine) (°) | 154.9 (3) Unit 1 |             |
|                                   | 154.2 (2) Unit 2 | 154.78 (12) |
| <b>Ru–C≡O</b> (°)                 | 179.3 (8) Unit 1 |             |
| (In carbonyl carbon)              | 178.9 (7) Unit 2 | 178.4 (4)   |

### 3. Optimization Tables, Figures and Schemes

**Table S2a.**  $\beta$ -Alkylation of 1-Phenyl Ethanol with Benzyl Alcohol Catalyzed by **1** and **2** Under Varying Conditions<sup>a</sup>

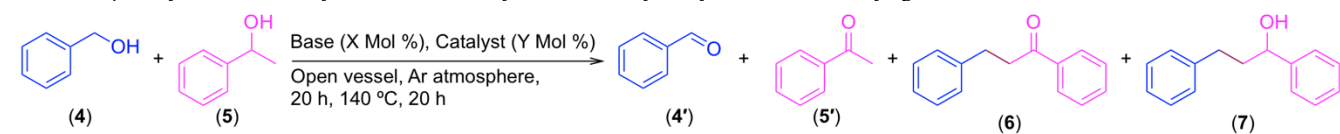

| Entry | Catalyst (Y Mol %) <sup>b</sup> | Base (X Mol %) <sup>b</sup>         | % Yield of Products <sup>c</sup> |       |       |    | Total Yield [TON] | Selectivity <sup>d</sup> towards 7 |
|-------|---------------------------------|-------------------------------------|----------------------------------|-------|-------|----|-------------------|------------------------------------|
|       |                                 |                                     | 4'                               | 5'    | 6     | 7  |                   |                                    |
| 1     | <b>2b</b> (0.05)                | NaO <sup>t</sup> Bu, 5              | 0                                | 13    | 12    | 57 | 82% [1640]        | 83%                                |
| 2     | <b>2b</b> (0.05)                | KO <sup>t</sup> Bu, 5               | 0                                | 8     | 6     | 65 | 79% [1580]        | 91%                                |
| 3     | <b>2b</b> (0.05)                | NaOH, 5                             | 0                                | 10    | 12    | 63 | 85% [1700]        | 84%                                |
| 4     | <b>2b</b> (0.05)                | KOH, 5                              | 0                                | 6     | 8     | 63 | 77% [1540]        | 89%                                |
| 5     | <b>2b</b> (0.05)                | Na, 5                               | 0                                | 13    | 11    | 65 | 89% [1780]        | 85%                                |
| 6     | <b>2b</b> (0.05)                | K <sub>2</sub> CO <sub>3</sub> , 5  | 0                                | 10    | 11    | 15 | 36% [720]         | 57%                                |
| 7     | <b>2b</b> (0.05)                | Na <sub>2</sub> CO <sub>3</sub> , 5 | 0                                | 10    | trace | 0  | 10% [200]         | 0                                  |
| 8     | <b>2b</b> (0.05)                | KO <sup>t</sup> Bu, 2.5             | 0                                | 10    | 8     | 65 | 83% [1660]        | 89%                                |
| 9     | <b>2b</b> (0.05)                | KO <sup>t</sup> Bu, 10              | 0                                | 5     | 5     | 69 | 79% [1649]        | 93%                                |
| 10    | <b>2b</b> (0.05)                | NaOH, 2.5                           | 0                                | 7     | 7     | 79 | 93% [1860]        | 91%                                |
| 11    | <b>2b</b> (0.05)                | NaOH, 10                            | 0                                | 10    | 10    | 65 | 85% [1700]        | 88%                                |
| 12    | <b>2b</b> (0.025)               | NaOH, 2.5                           | 0                                | 14    | 13    | 70 | 97% [3880]        | 84%                                |
| 13    | <b>2b</b> (0.025)               | KO <sup>t</sup> Bu, 2.5             | 0                                | 14    | 15    | 68 | 97% [3880]        | 82%                                |
| 14    | –                               | KO <sup>t</sup> Bu, 2.5             | 0                                | trace | 1     | 6  | 7% [NA]           | NA                                 |
| 15    | <b>2b</b> (0.025)               | –                                   | 0                                | 5     | 2     | 4  | 11% [440]         | NA                                 |
| 16    | <b>2b</b> (0.0025)              | NaOH, 2.5                           | 0                                | 16    | 16    | 63 | 99% [39600]       | 79%                                |
| 17    | <b>2b</b> (0.00025)             | NaOH, 2.5                           | 0                                | 1     | 19    | 73 | 93% [372000]      | 79%                                |
| 18    | <b>1a</b> (0.00025)             | NaOH, 2.5                           | 0                                | 2     | 7     | 78 | 87% [348000]      | 92%                                |
| 19    | <b>1b</b> (0.0025)              | NaOH, 2.5                           | 0                                | 2     | 7     | 78 | 87% [348000]      | 92%                                |
| 20    | <b>1b</b> (0.00025)             | NaOH, 2.5                           | 0                                | 1     | 7     | 81 | 89% [356000]      | 92%                                |
| 21    | <b>1c</b> (0.0025)              | NaOH, 2.5                           | 0                                | trace | 10    | 79 | 89% [35600]       | 89%                                |
| 22    | <b>1c</b> (0.00025)             | NaOH, 2.5                           | 0                                | 2     | 9     | 75 | 86% [344000]      | 89%                                |
| 23    | <b>1d</b> (0.00025)             | NaOH, 2.5                           | 0                                | 2     | 15    | 65 | 80% [320000]      | 81%                                |
| 24    | <b>2a</b> (0.00025)             | NaOH, 2.5                           | 0                                | 1     | 10    | 78 | 89% [356000]      | 88%                                |
| 25    | <b>2c</b> (0.00025)             | NaOH, 2.5                           | 0                                | 1     | 10    | 78 | 89% [356000]      | 88%                                |
| 26    | <b>2d</b> (0.00025)             | NaOH, 2.5                           | 0                                | 2     | 3     | 57 | 62% [248000]      | 95%                                |

<sup>a</sup>Reaction conditions: 4.14 mmol of **4**, 4.14 mmol of **5**, X mol % of base and Y mol % of pincer-ruthenium. <sup>b</sup>Mol % of base and catalyst is with respect to total alcohol content (**4**+**5**). <sup>c</sup>Yield is determined from <sup>1</sup>H NMR using toluene as external standard. <sup>d</sup>Selectivity = Yield of **7**/Total Yield.

**Table S2b.**  $\beta$ -Alkylation of Substituted 1-Phenyl Ethanol with Various Benzyl Alcohols Catalyzed by 0.00025 Mol % of **2b**<sup>a</sup>

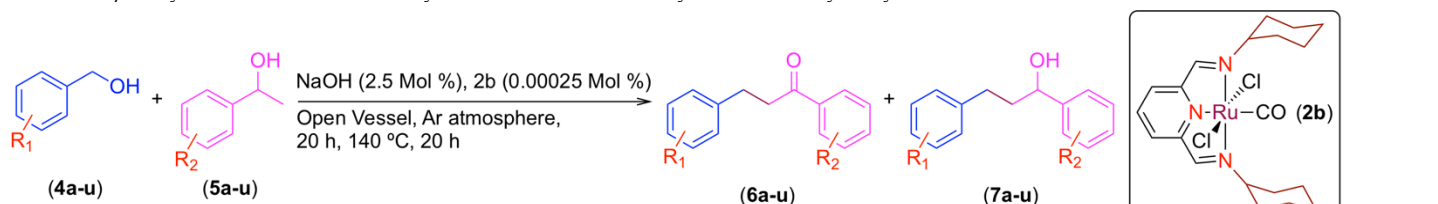

| Entry | Product                                                                                  | 7 Yield <sup>b</sup><br>[7 Selectivity] <sup>c</sup> | Total TON<br>(6 + 7)        | Entry | Product                                                                                   | 7 Yield <sup>b</sup><br>[7 Selectivity] <sup>c</sup> | Total TON<br>(6 + 7) |
|-------|------------------------------------------------------------------------------------------|------------------------------------------------------|-----------------------------|-------|-------------------------------------------------------------------------------------------|------------------------------------------------------|----------------------|
| 1     |  (7)    | 73 % [79:21]                                         | 372000                      | 12    |  (7k)   | 70 % [89:11]                                         | 316000               |
| 2     |  (7a)   | 63 % [93:7]                                          | 368000                      | 13    |  (7l)   | 28 % [80:20]                                         | 140000               |
| 3     |  (7b)   | 85 % [94:6]                                          | 360000                      | 14    |  (7m)   | 21 % <sup>d</sup> [100: 0]                           | 840 <sup>d</sup>     |
| 4     |  (7c)   | 74 % [83:17]                                         | 356000                      | 15    |  (7n)   | 53 % <sup>d</sup> [99: 1]                            | 2120 <sup>d</sup>    |
| 5     |  (7d) | 38 % [93:7]<br>46 % <sup>d</sup> [88:12]             | 164000<br>2080 <sup>d</sup> | 16    |  (7o) | 30 % <sup>d</sup> [99: 1]                            | 1200 <sup>d</sup>    |
| 6     |  (7e) | 6 % [55:45]<br>30 % <sup>d</sup> [83:17]             | 44000<br>1440 <sup>d</sup>  | 17    |  (7p) | 32 % <sup>d</sup> [91: 9]                            | 1400 <sup>d</sup>    |
| 7     |  (7f) | 3 % [75:25]<br>63 % <sup>d</sup> [97:3]              | 16000<br>2600 <sup>d</sup>  | 18    |  (7q) | 73 % [88:12]                                         | 332000               |
| 8     |  (7g) | 50 % [91:9]                                          | 220000                      | 19    |  (7r) | 10 % [83:17]                                         | 40000                |
| 9     |  (7h) | 50 % [81:19]                                         | 248000                      | 20    |  (7s) | 19 % [99:1]                                          | 76000                |
| 10    |  (7i) | 80 % [84:16]                                         | 380000                      | 21    |  (7t) | 77 % [95:5]                                          | 324000               |
| 11    |  (7j) | 37 % [90:10]<br>48 % <sup>d</sup> [87:13]            | 160000<br>2200 <sup>d</sup> | 22    |  (7u) | 36 %<br>2 Diastereomers [95:5]                       | 144000               |

<sup>a</sup>Reaction conditions: 4.14 mmol of **4**, 4.14 mmol of **5**, 0.207 mmol of NaOH and 20  $\mu$ mol of **2b**. <sup>b</sup>Yield is determined from <sup>1</sup>H NMR using toluene as external standard. <sup>c</sup>Selectivity = Yield of 7/Total Yield. <sup>d</sup>Reaction performed with 0.025 mol % of **2**

**Table S2c.** The **2b** Catalyzed Upgradation of Ethanol (**4v**) to *n*-Butanol (**4p**)<sup>a</sup>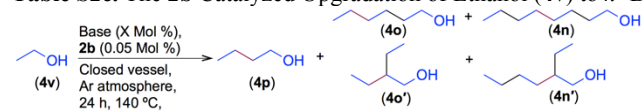

| Entry             | Base (mol %)                        | % Butanol Selectivity <sup>b</sup> | Total TON <sup>c,b</sup> |
|-------------------|-------------------------------------|------------------------------------|--------------------------|
| 1                 | NaO <sup>t</sup> Bu, 10             | 90                                 | 195                      |
| 2                 | NaO <sup>t</sup> Bu, 20             | 97                                 | 145                      |
| 3                 | KOH, 10                             | 85                                 | 155                      |
| 4                 | KO <sup>t</sup> Bu, 10              | 86                                 | 65                       |
| 5                 | Et <sub>3</sub> N, 10               | ND                                 | trace                    |
| 6                 | K <sub>2</sub> CO <sub>3</sub> , 10 | 0                                  | 0                        |
| 7                 | Mg, 10                              | 0                                  | 0                        |
| 8                 | NaH, 10                             | 90                                 | 260                      |
| 9                 | NaOH, 10                            | 90                                 | 310                      |
| 10                | NaOH, 5                             | 85                                 | 150                      |
| 11                | NaOH, 20                            | 80                                 | 330                      |
| 12 <sup>d</sup>   | NaOH, 10                            | 90                                 | 290                      |
| 13 <sup>d,e</sup> | NaOH, 10                            | 90                                 | 320                      |
| 14 <sup>f</sup>   | NaOEt, 10                           | 90                                 | 335                      |
| 15 <sup>e,f</sup> | NaOEt, 10                           | 90                                 | 410                      |

<sup>a</sup>Reaction conditions: 8.56 mmol of ethanol, X mol % of base and 4.28 μmol of **2b**. <sup>b</sup>Selectivity and TON were calculated by GC analysis using toluene as an internal standard. <sup>c</sup>Total ethanol converted to products. <sup>d</sup>The reaction was carried out at 150 °C. <sup>e</sup>Reaction was carried out for 48 h. <sup>f</sup>NaOEt was prepared *in-situ* using ethanol (110 mol %) and Na(10 mol %) prior to addition of **2b**

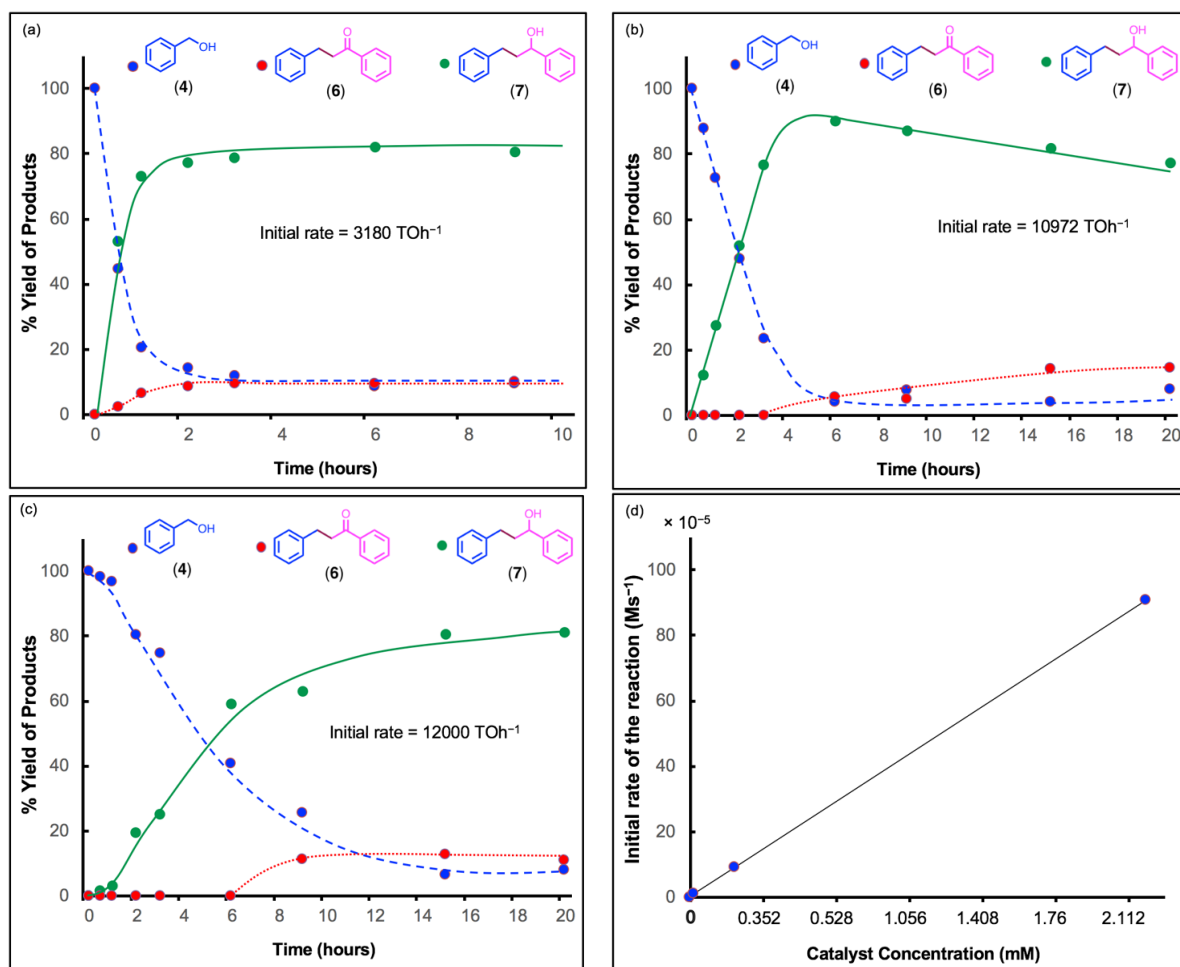

**Figure S1.** Time course of the reaction of benzyl alcohol (**4**) with 1-phenyl ethanol (**5**) at 140 °C catalyzed by (a) 0.025 mol % **2b**, (b) 0.0025 mol % **2b** and (c) 0.00025 mol % **2b**. (d) Plot of initial rate of the reaction vs catalyst concentration (0.022, 0.22 and 2.2 mM).

Dehydrogenation + Alcoholysis

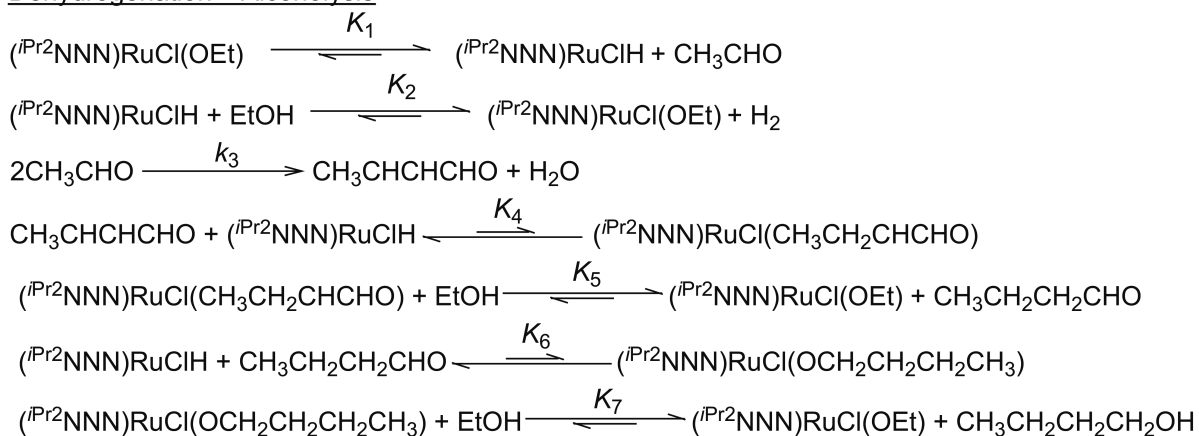

Dehydrogenation + Hydrogenation

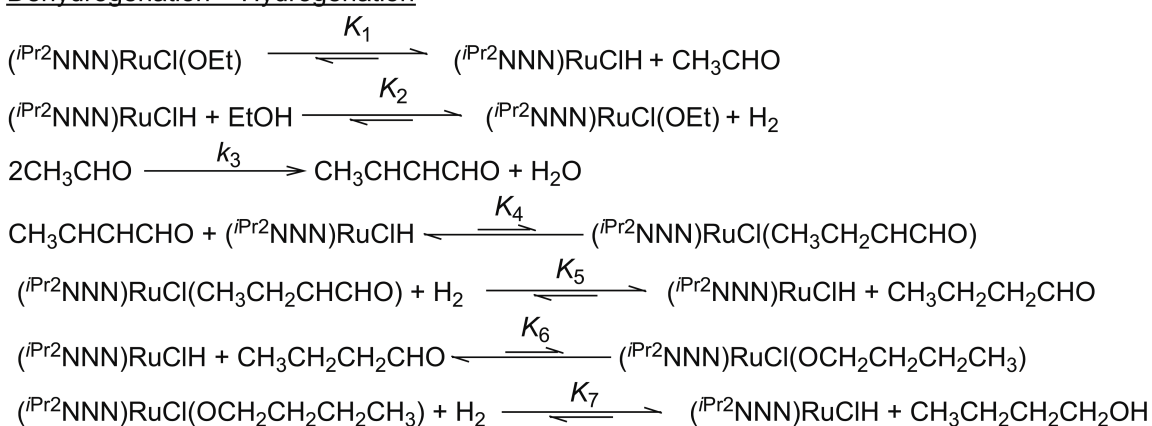

Either for hydrogenation or for alcoholysis,  $k_2 > k_{-2}$ , and under low steady state concentration of  $CH_3CHCHCHO$

$$\text{Rate} = (k_2)[(iPr_2NNN)RuClH][EtOH] \quad (1)$$

**Scheme S1.** Rate Equation for the **2c** Catalyzed Alkylation of Alcohols

#### 4. NMR spectra

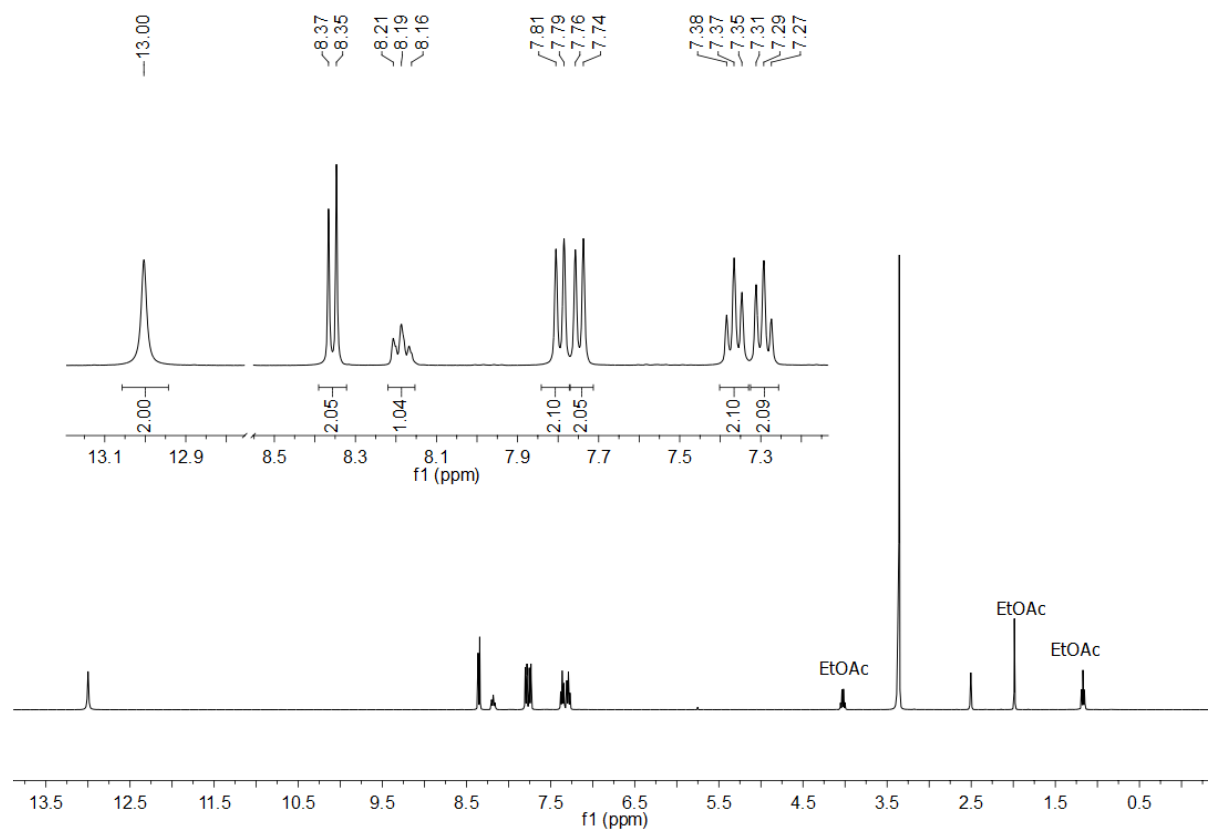

Figure S1e:  $^1\text{H}$  NMR spectra of **3e**

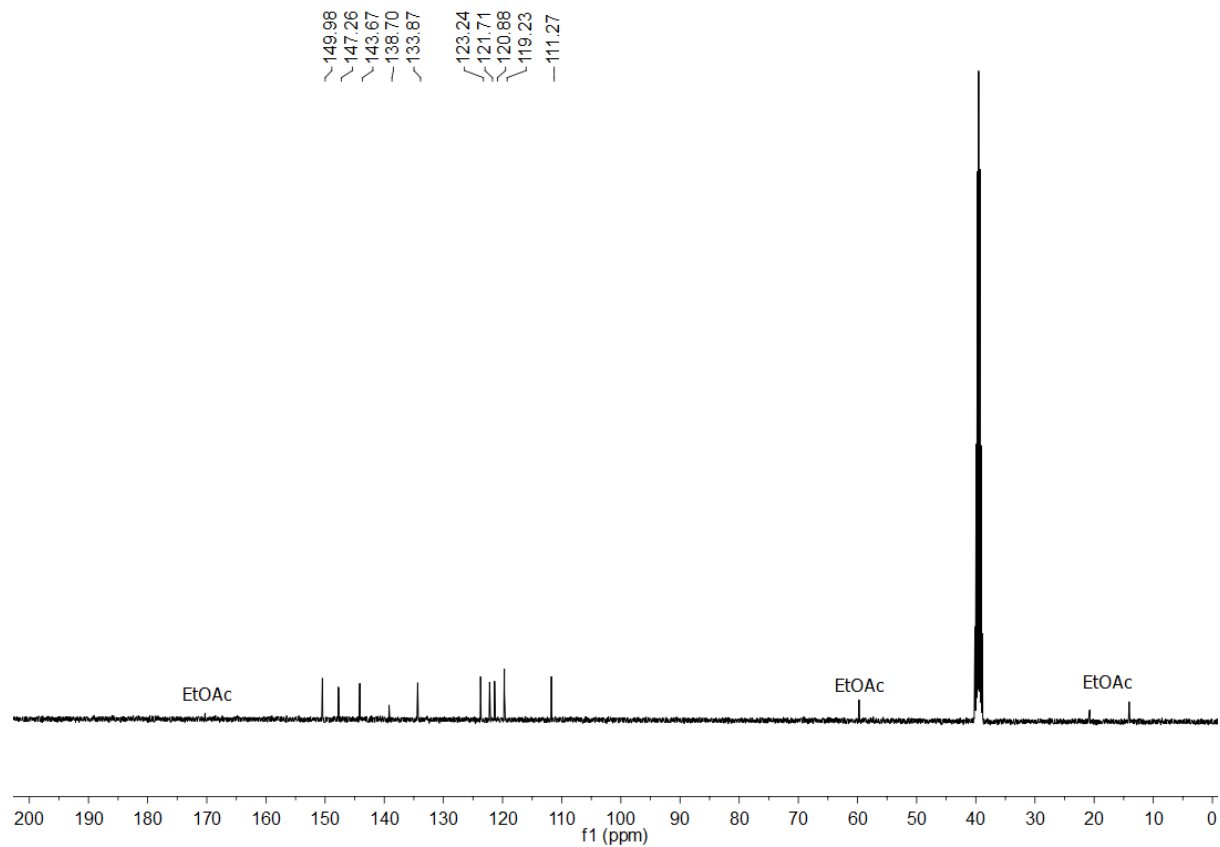

Figure S2:  $^{13}\text{C}$  NMR spectra of **3e**



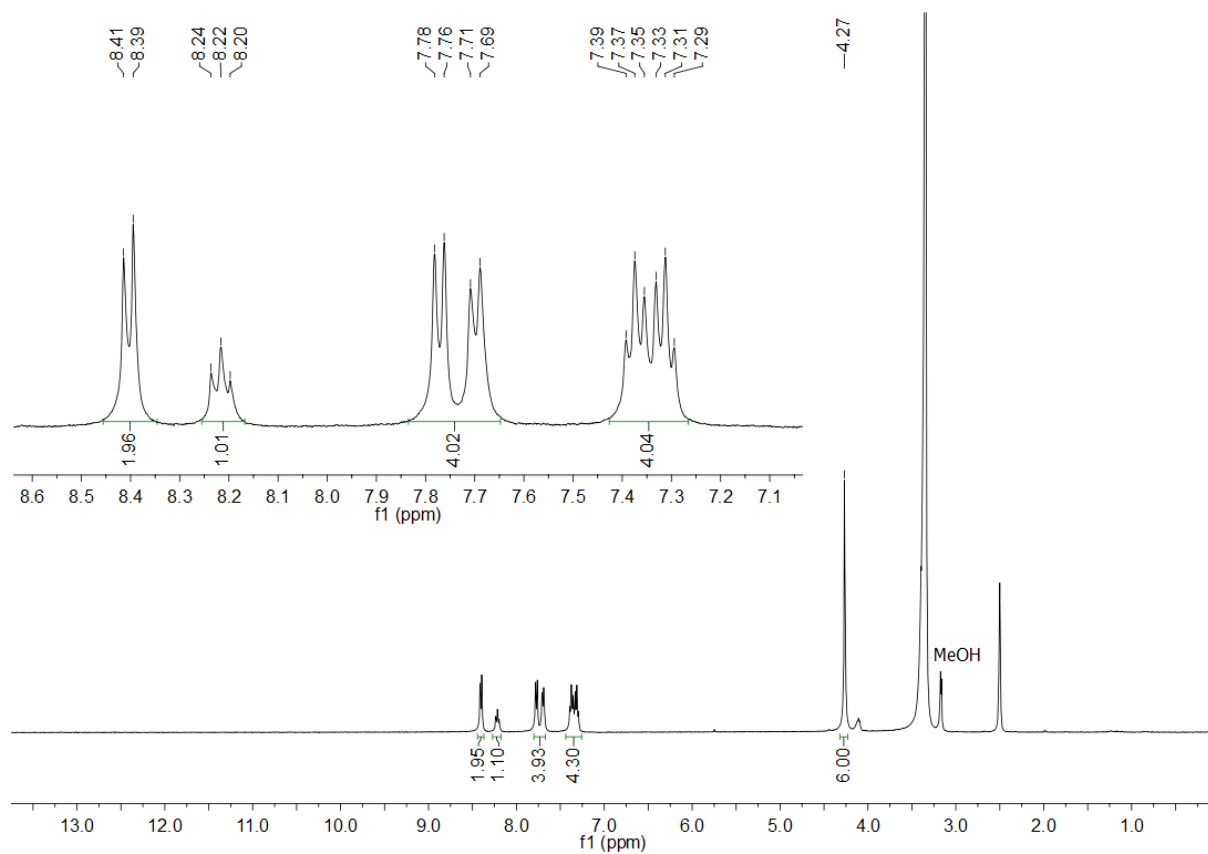

Figure S3:  $^1\text{H}$  NMR spectra of **3f**

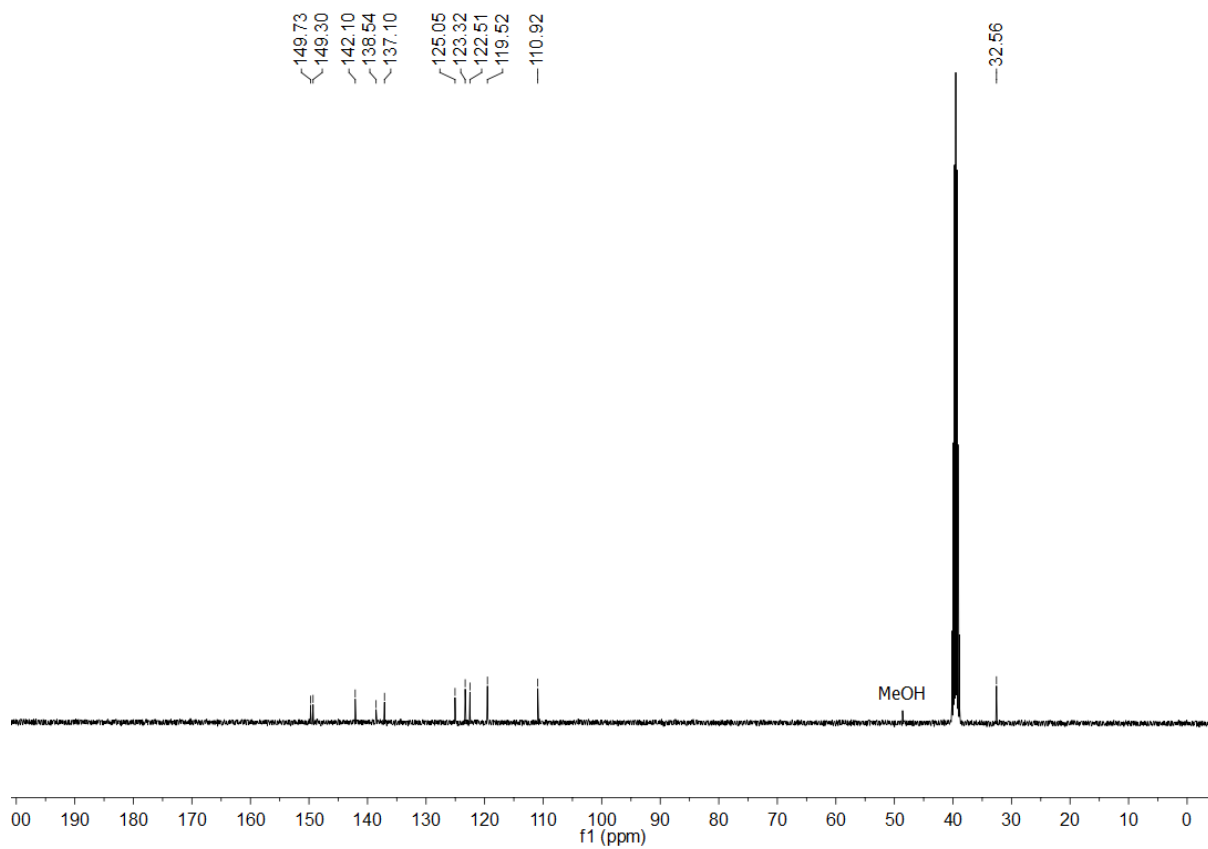

Figure S4:  $^{13}\text{C}$  NMR spectra of **3f**

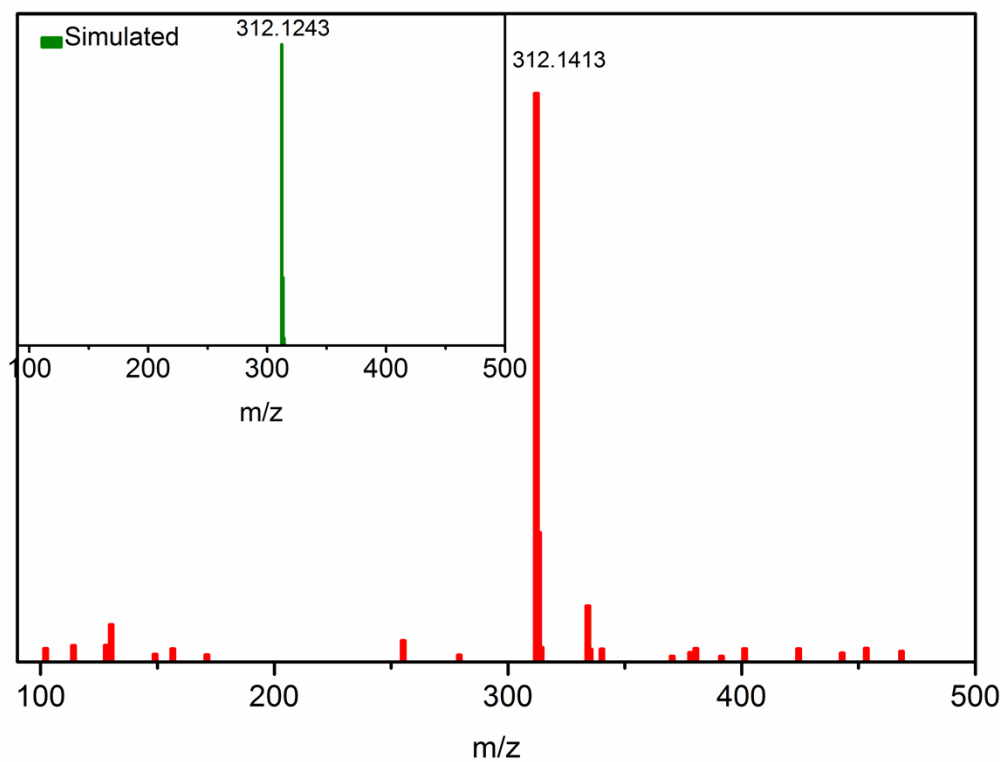

**Figure S5:** ESI-MS full spectra of **3e** with simulated data

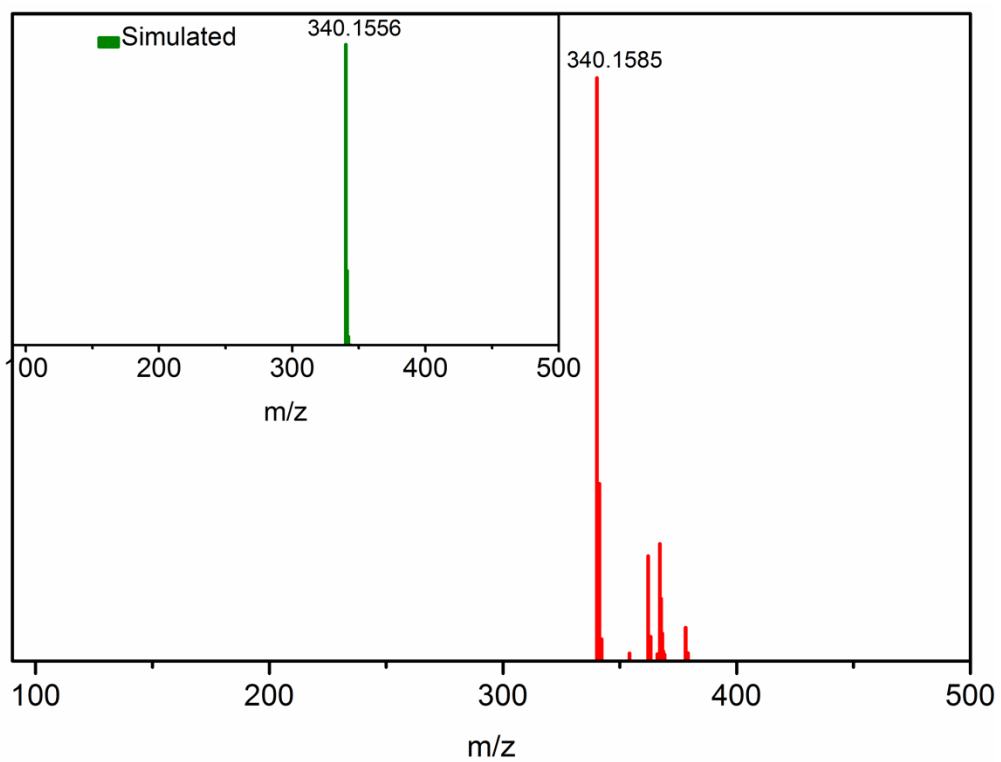

**Figure S6:** ESI-MS full spectra of **3f** with simulated data

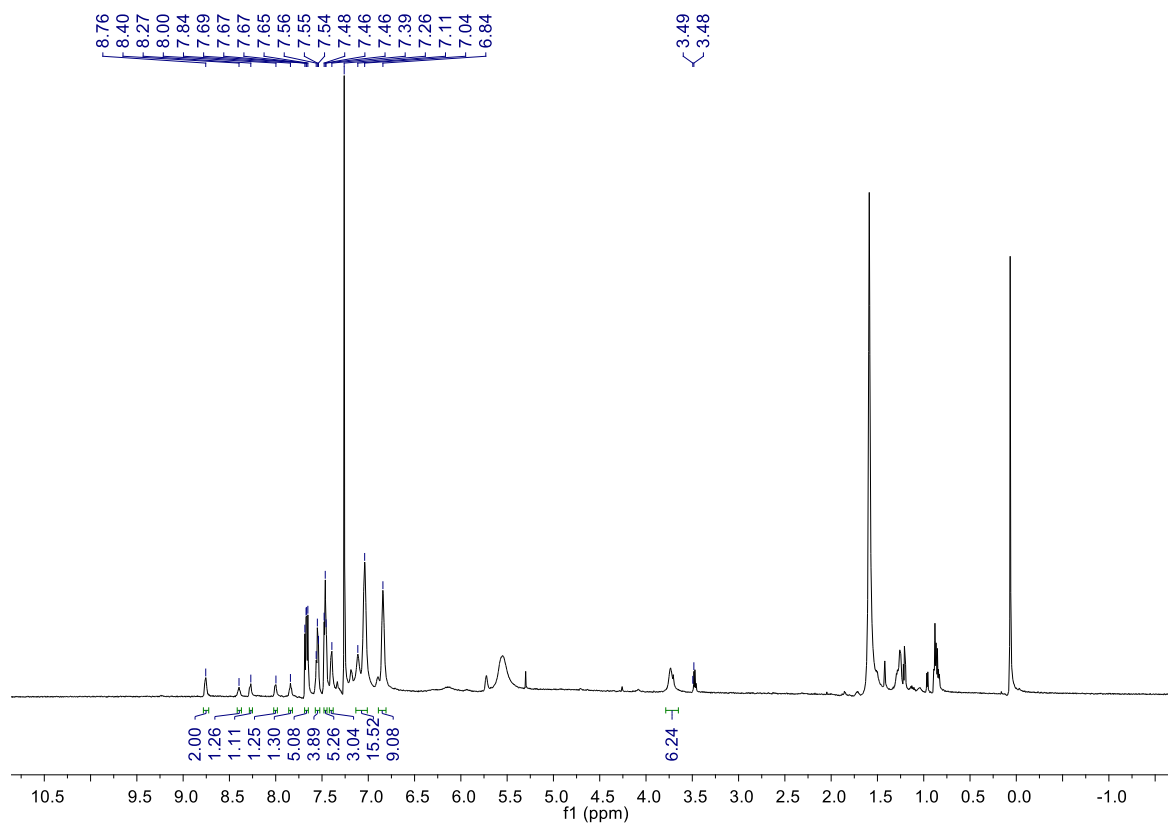

**Figure S7:**  $^1\text{H}$  NMR spectra of  $[(^{\text{MeBim2}}\text{NNN})\text{RuCl}(\text{PPh}_3)_2]\text{Cl}$  (**1f**)

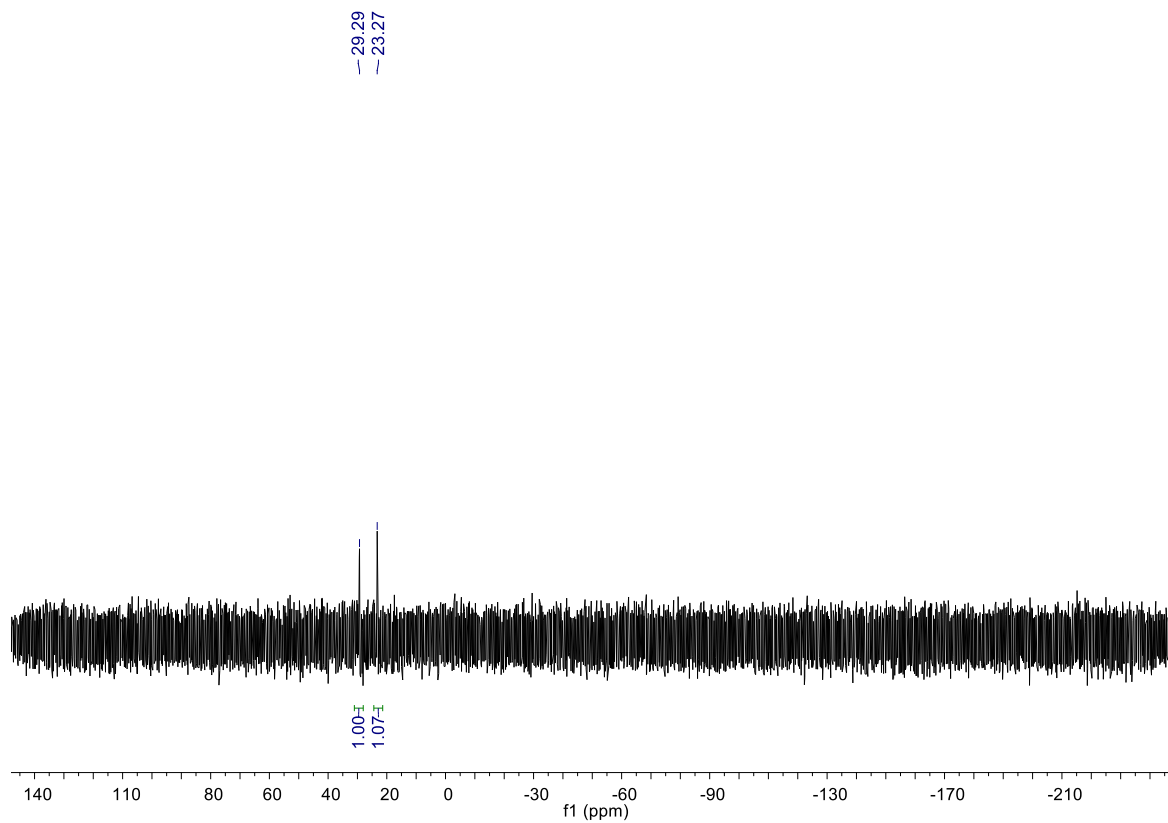

**Figure S8:**  $^{31}\text{P}$  NMR spectra of  $[(^{\text{MeBim2}}\text{NNN})\text{RuCl}(\text{PPh}_3)_2]\text{Cl}$  (**1f**)

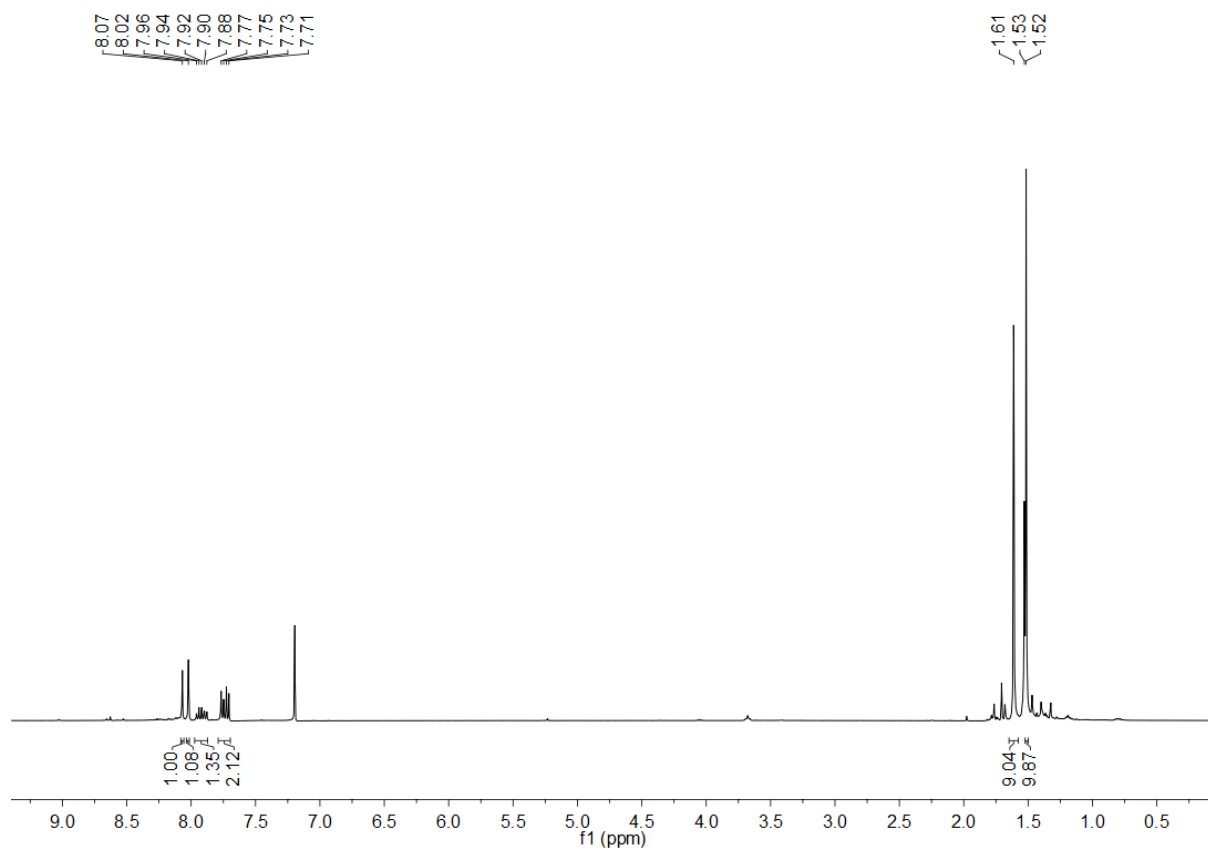

**Figure S9:** <sup>1</sup>H NMR spectra of (tBu<sub>2</sub>NNN)RuCl<sub>2</sub>(CO) (**2a**)

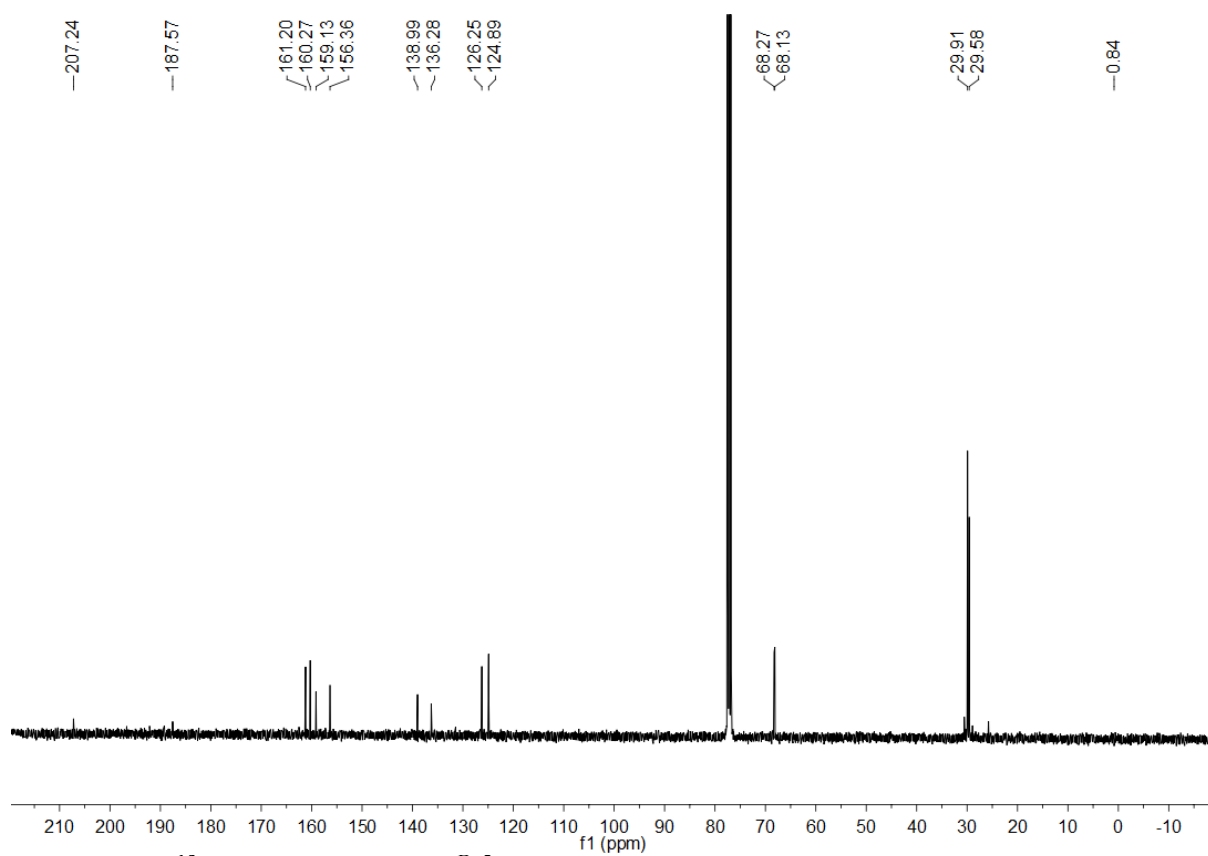

**Figure S10:** <sup>13</sup>C NMR spectra of (tBu<sub>2</sub>NNN)RuCl<sub>2</sub>(CO) (**2a**)

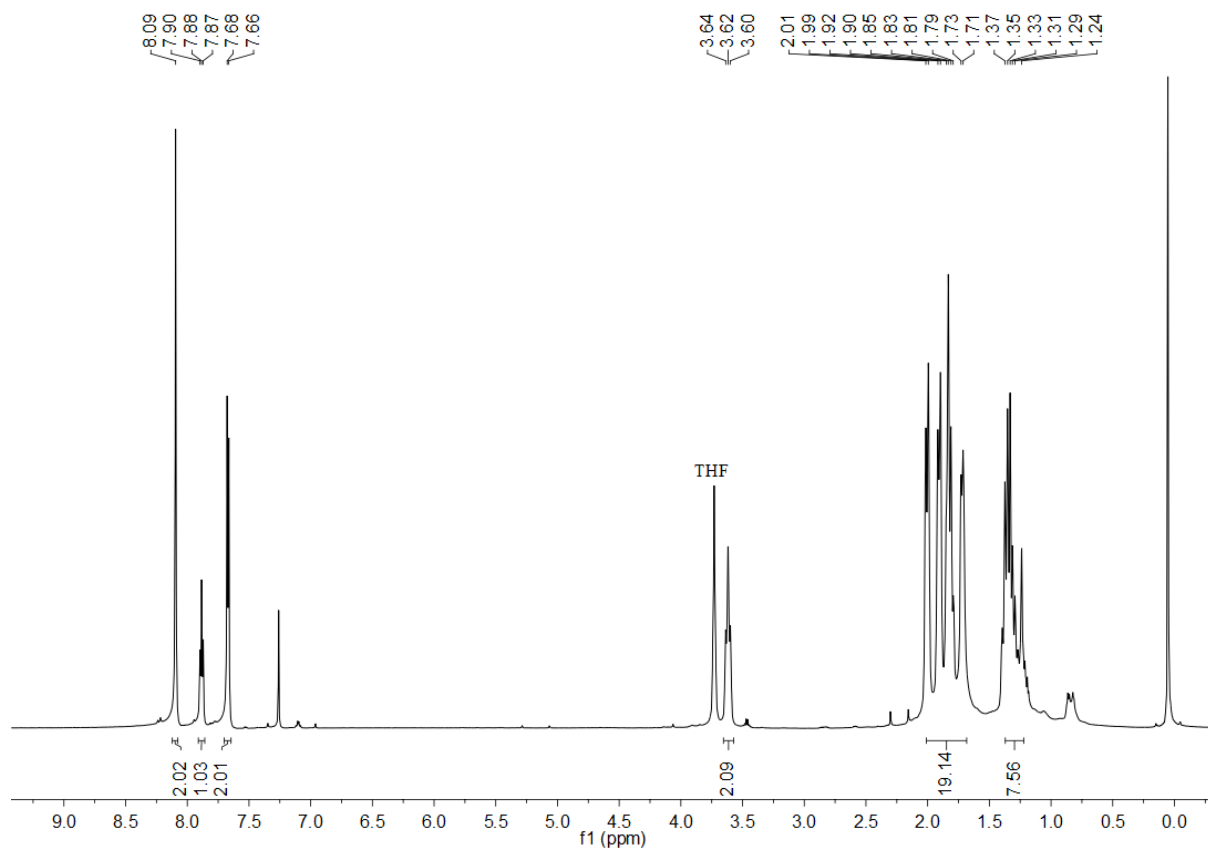

**Figure S11:**  $^1\text{H}$  NMR spectra of  $(\text{Cy}^2\text{NNN})\text{RuCl}_2(\text{CO})$  (**2b**)

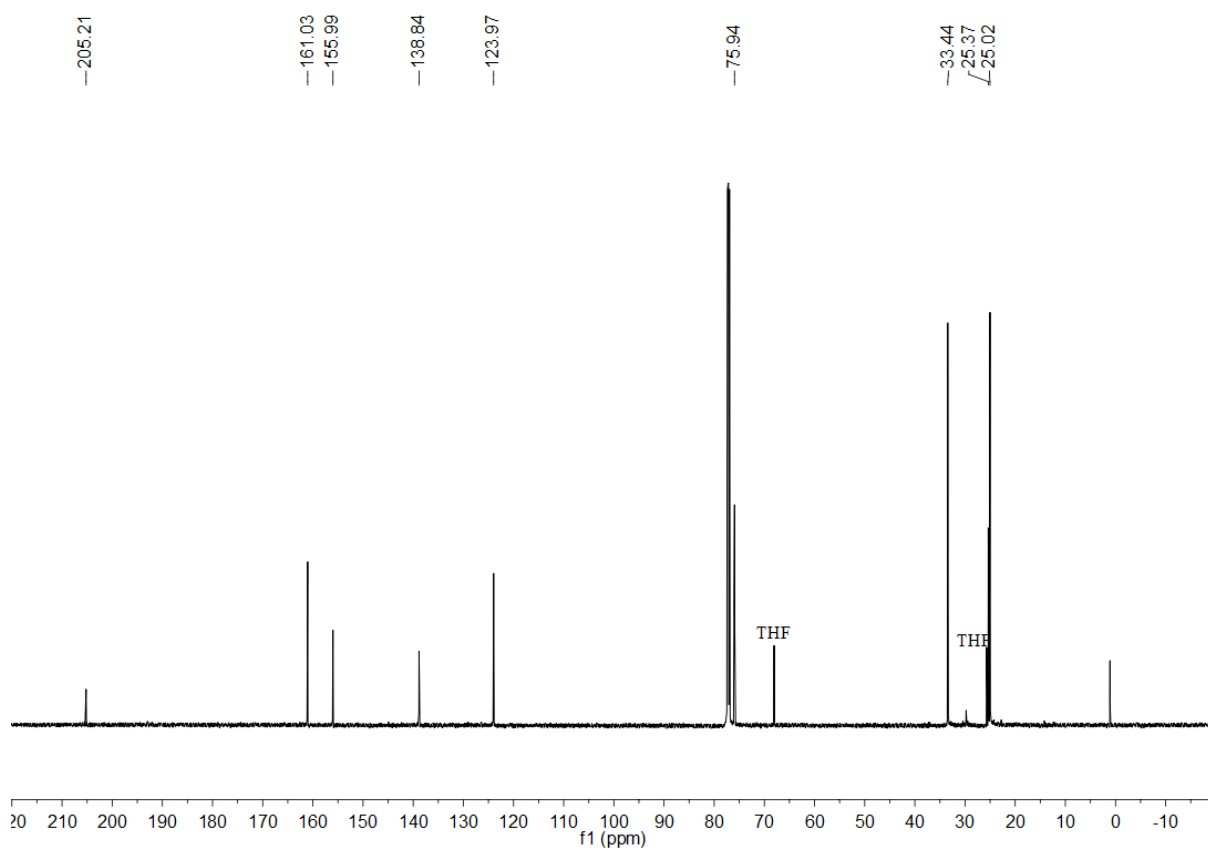

**Figure S12:**  $^{13}\text{C}$  NMR spectra of  $(\text{Cy}^2\text{NNN})\text{RuCl}_2(\text{CO})$  (**2b**)

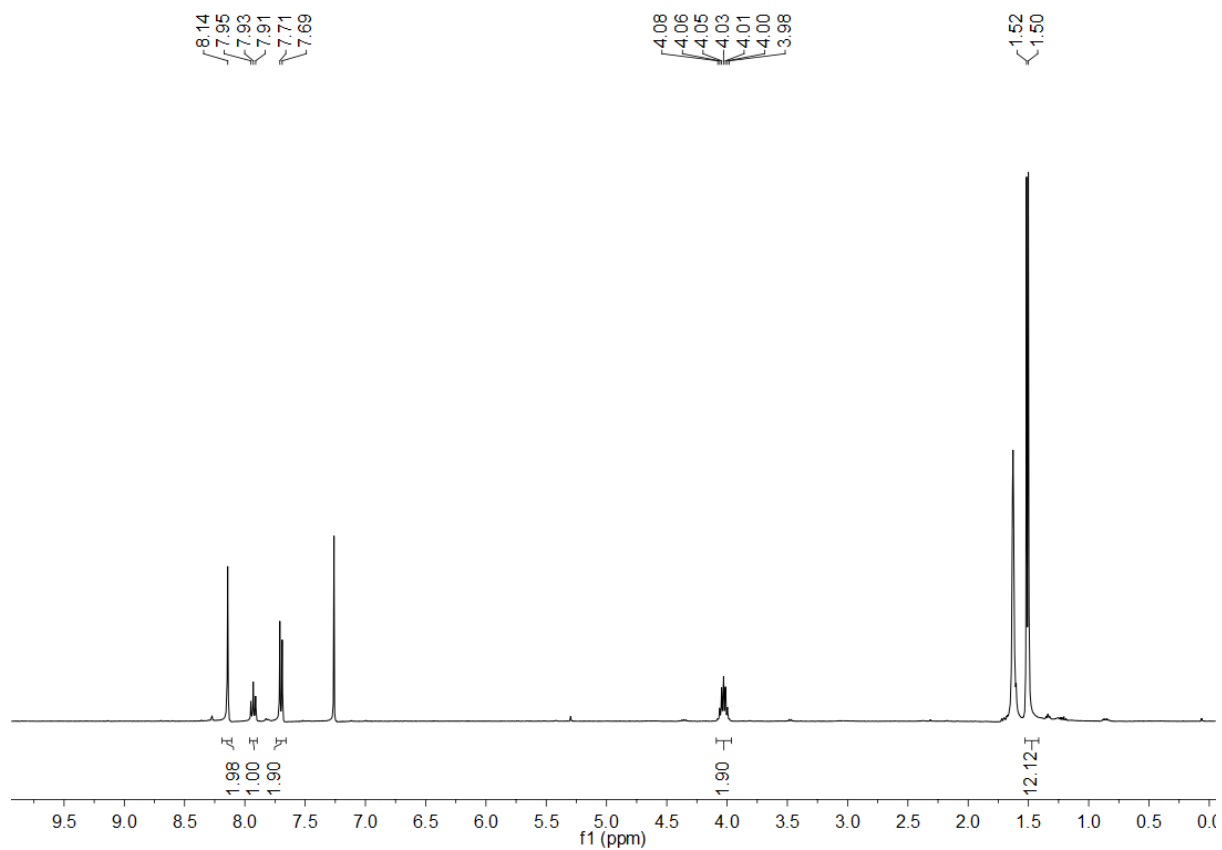

**Figure S13:**  $^1\text{H}$  NMR spectra of  $(i\text{Pr}_2\text{NNN})\text{RuCl}_2(\text{CO})$  (**2c**)

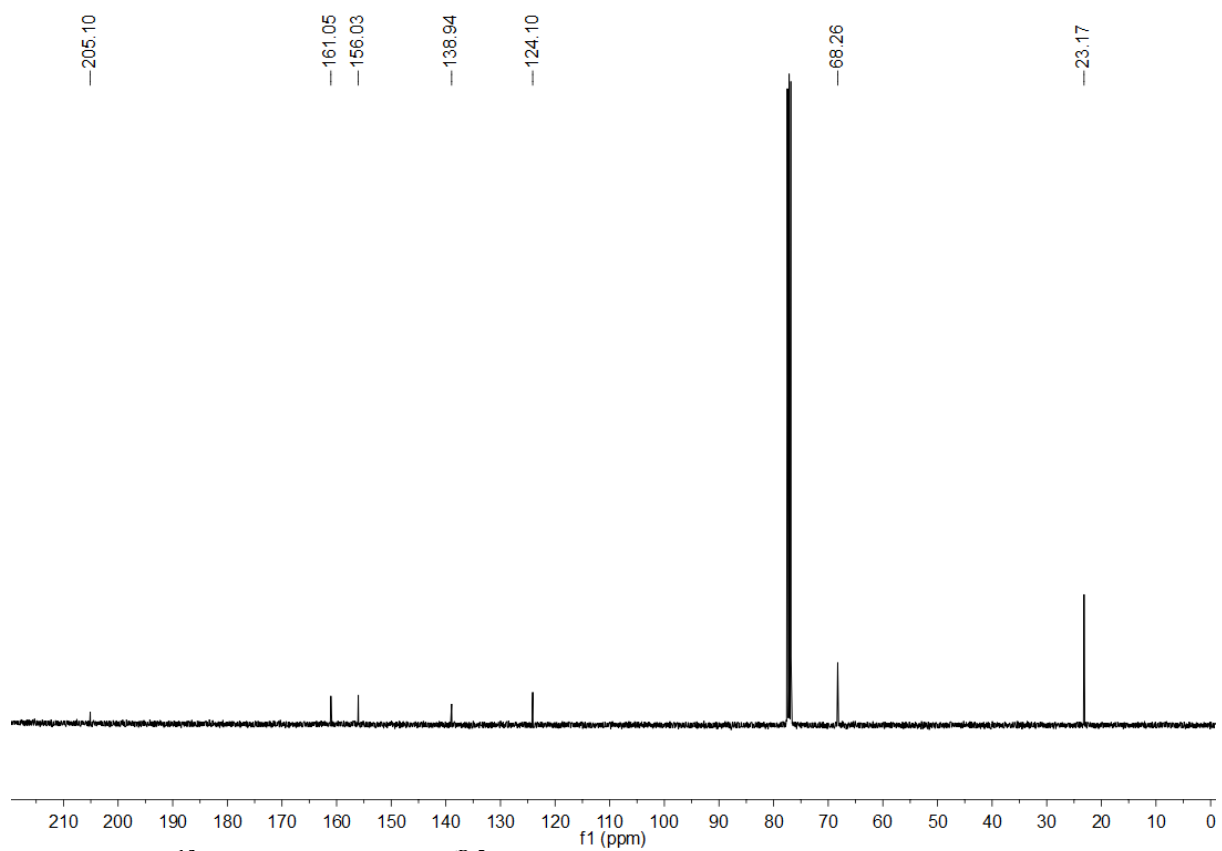

**Figure S14:**  $^{13}\text{C}$  NMR spectra of  $(i\text{Pr}_2\text{NNN})\text{RuCl}_2(\text{CO})$  (**2c**)

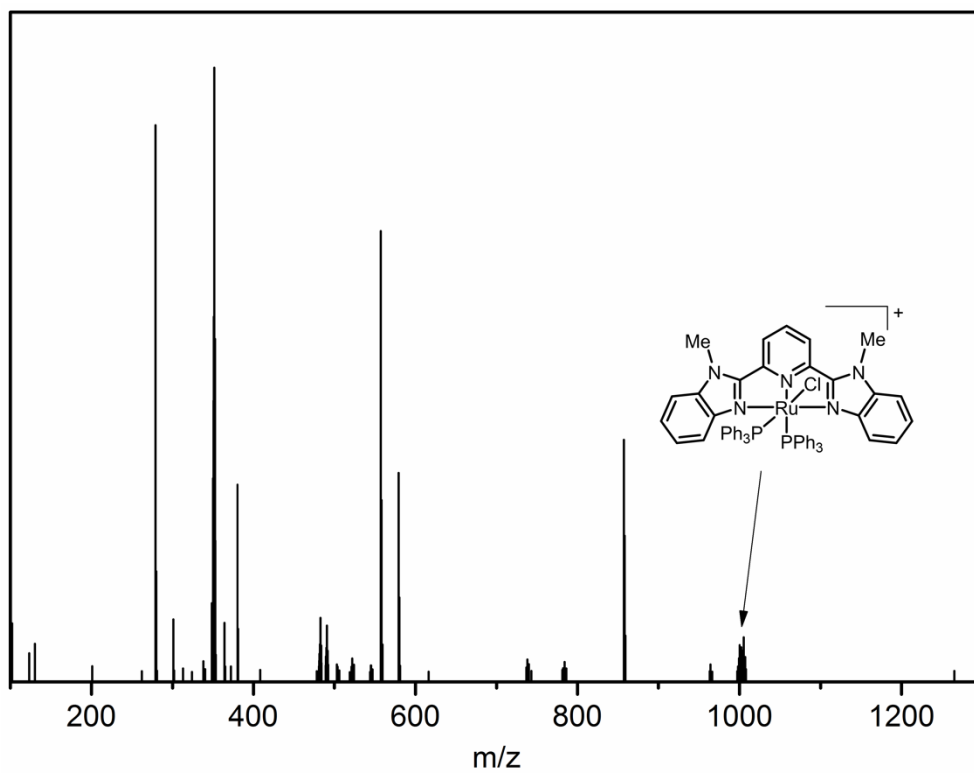

**Figure S15:** ESI-MS full spectra of complex  $[(^{\text{MeBim}2}\text{NNN})\text{RuCl}(\text{PPh}_3)_2]\text{Cl}$  (**1f**)

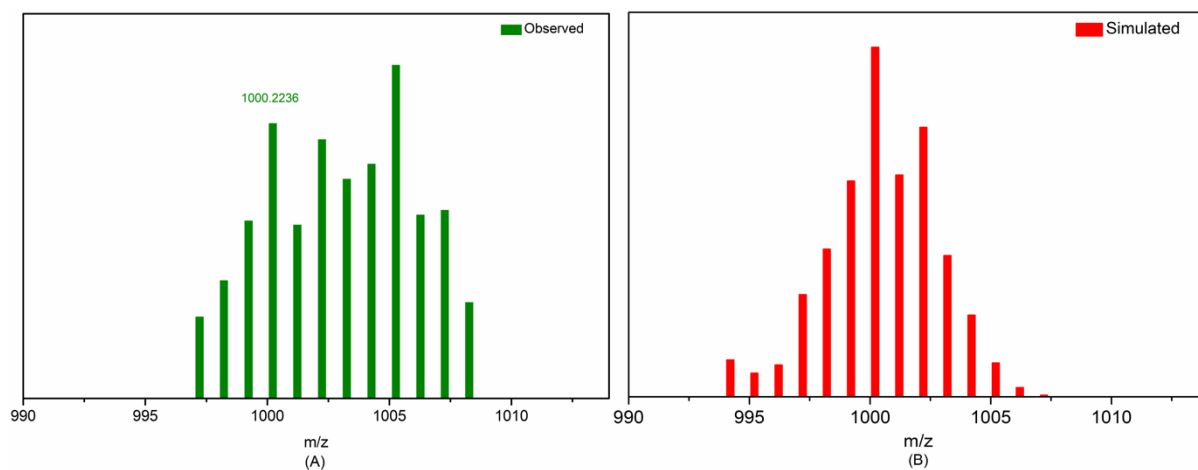

**Figure S16:** ESI-MS expanded spectra of complex  $[(^{\text{MeBim}2}\text{NNN})\text{RuCl}(\text{PPh}_3)_2]\text{Cl}$  (**1f**) at  $m/z$  1000.2236 (A) Observed (B) Simulated.

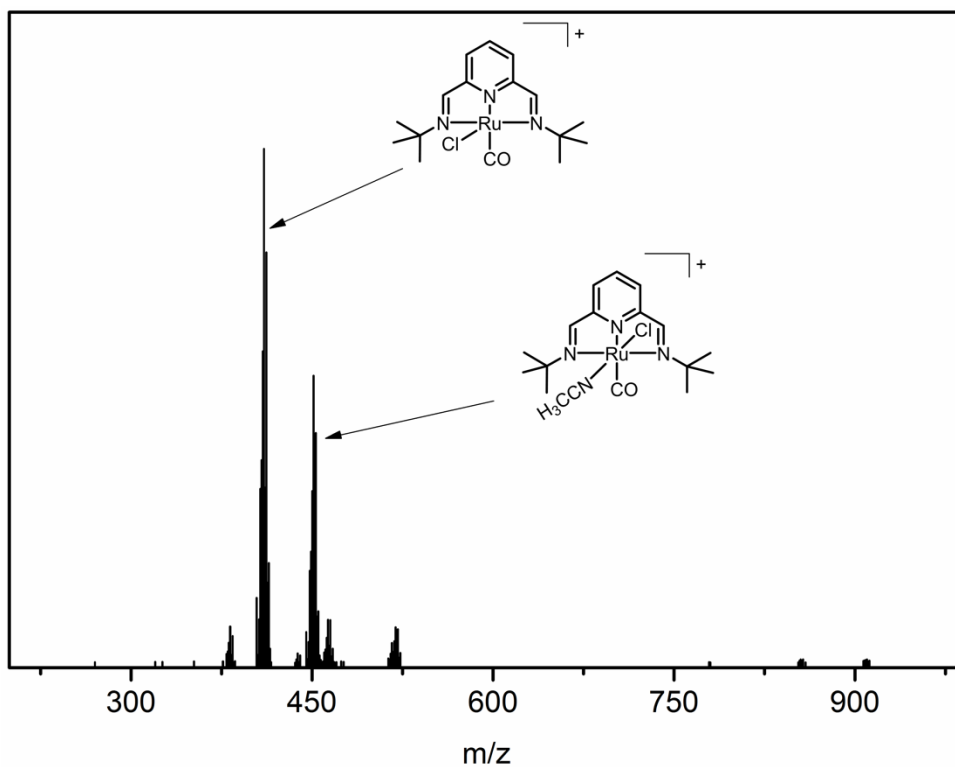

**Figure S17:** ESI-MS full spectra of complex  $(t\text{Bu}_2\text{NNN})\text{RuCl}_2(\text{CO})$  (**2a**)

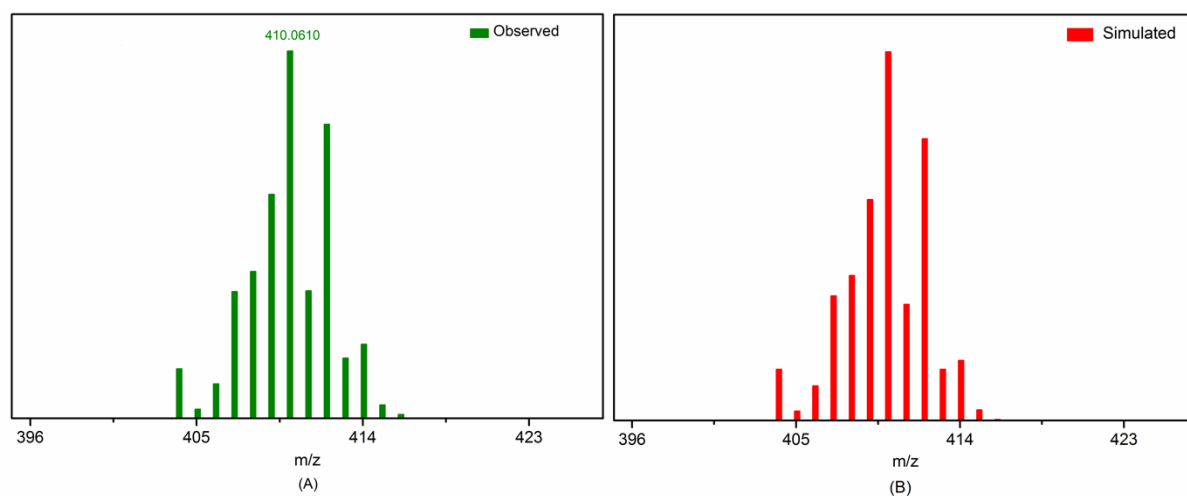

**Figure S18:** ESI-MS expanded spectra of complex  $(t\text{Bu}_2\text{NNN})\text{RuCl}_2(\text{CO})$  (**2a**) at  $m/z$  410.0610 (A) Observed (B) Simulated.



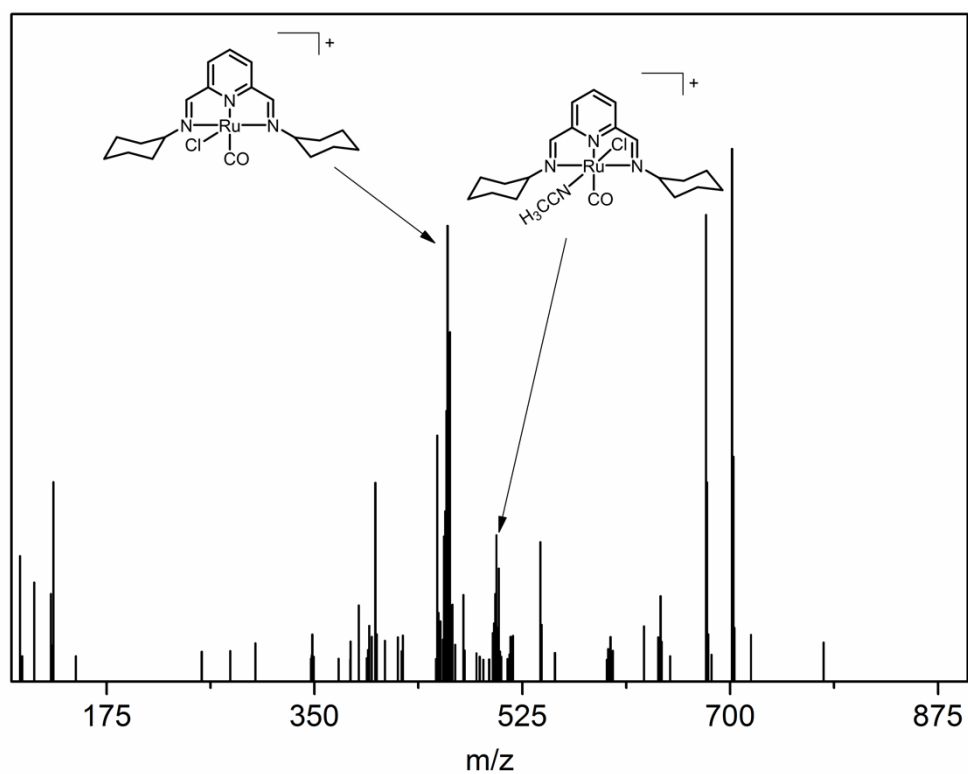

**Figure S19:** ESI-MS full spectra of complex  $(\text{Cy}^2\text{NNN})\text{RuCl}_2(\text{CO})$  (**2b**)

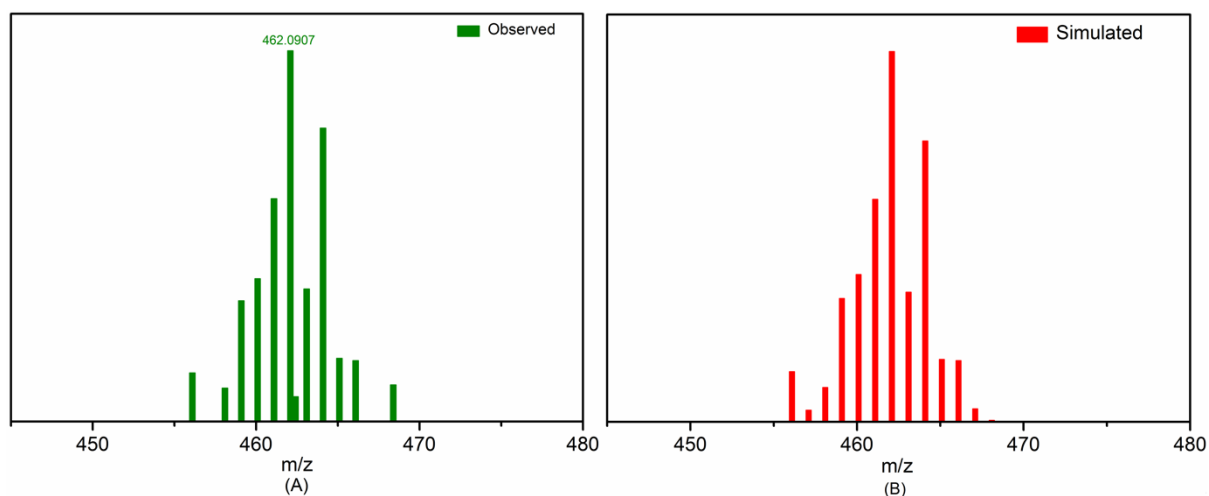

**Figure S20:** ESI-MS expanded spectra of complex  $(\text{Cy}^2\text{NNN})\text{RuCl}_2(\text{CO})$  (**2b**) at  $m/z$  462.0907 (A) Observed (B) Simulated.

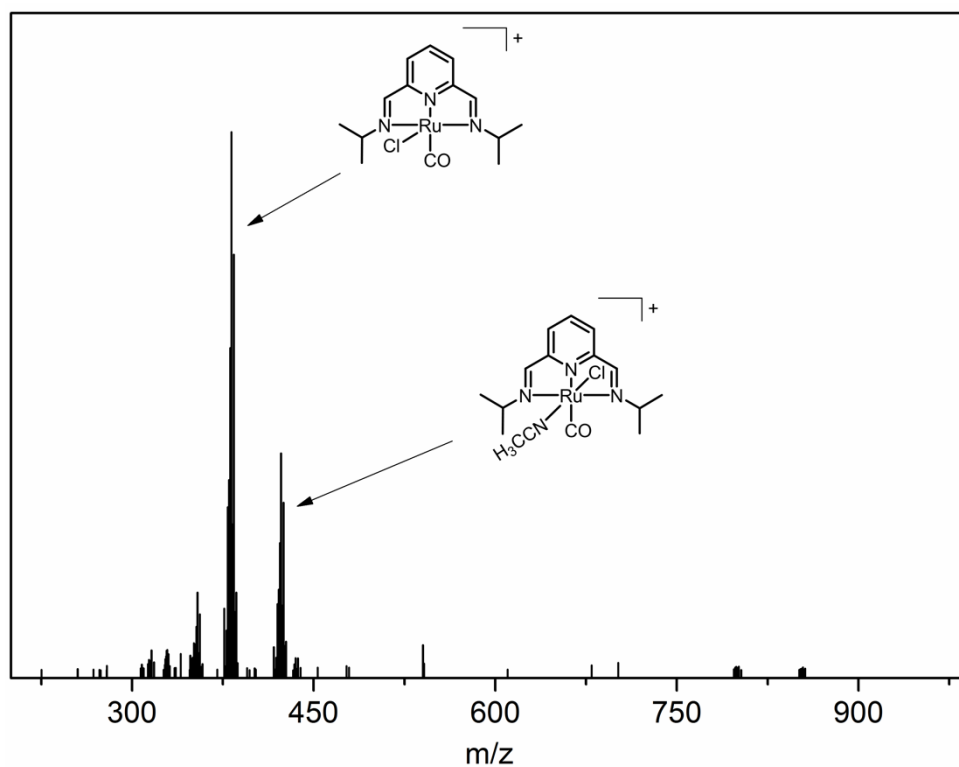

**Figure S21:** ESI-MS full spectra of complex  $(iPr_2NNN)RuCl_2(CO)$  (**2c**)

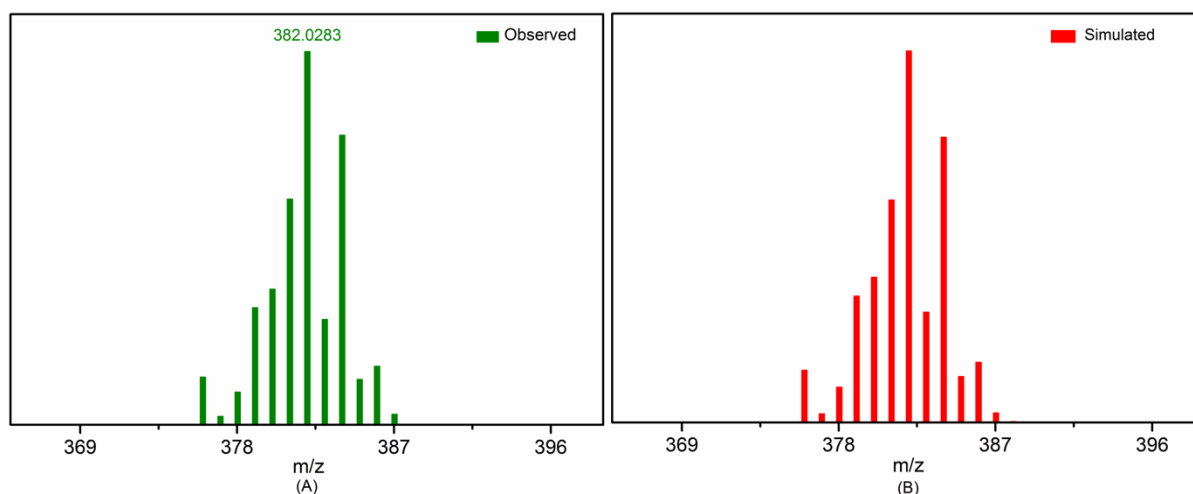

**Figure S22:** ESI-MS expanded spectra of complex  $(iPr_2NNN)RuCl_2(CO)$  (**2c**) at  $m/z$  382.0283 (A) Observed (B) Simulated.

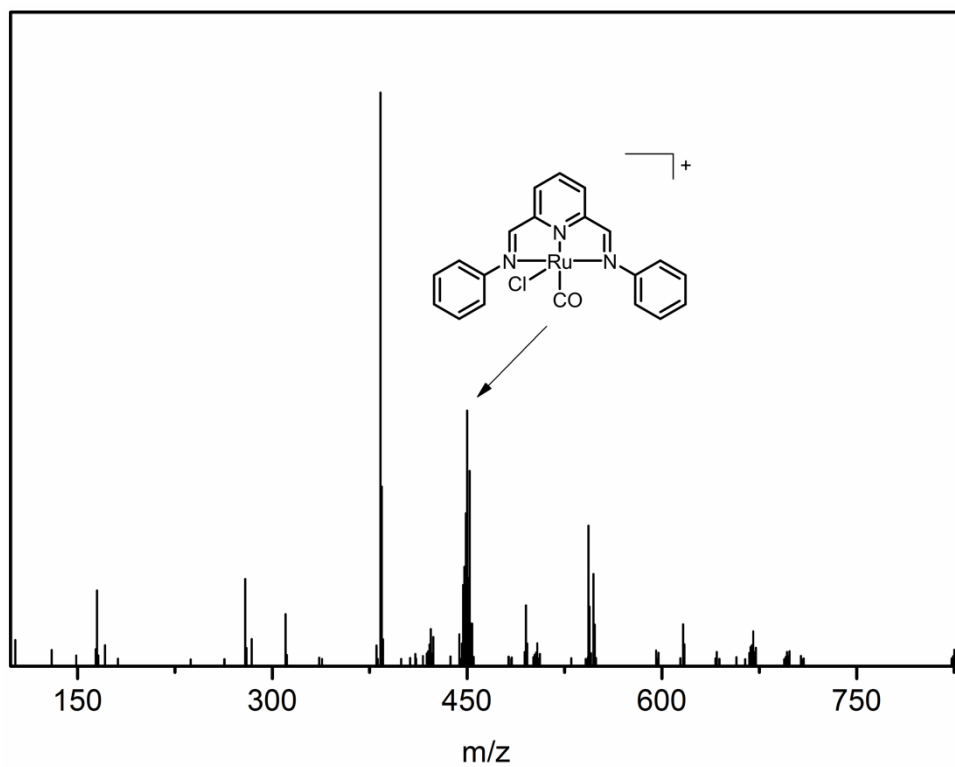

**Figure S23:** ESI-MS full spectra of complex  $(\text{Ph}^2\text{NNN})\text{RuCl}_2(\text{CO})$  (**2d**)

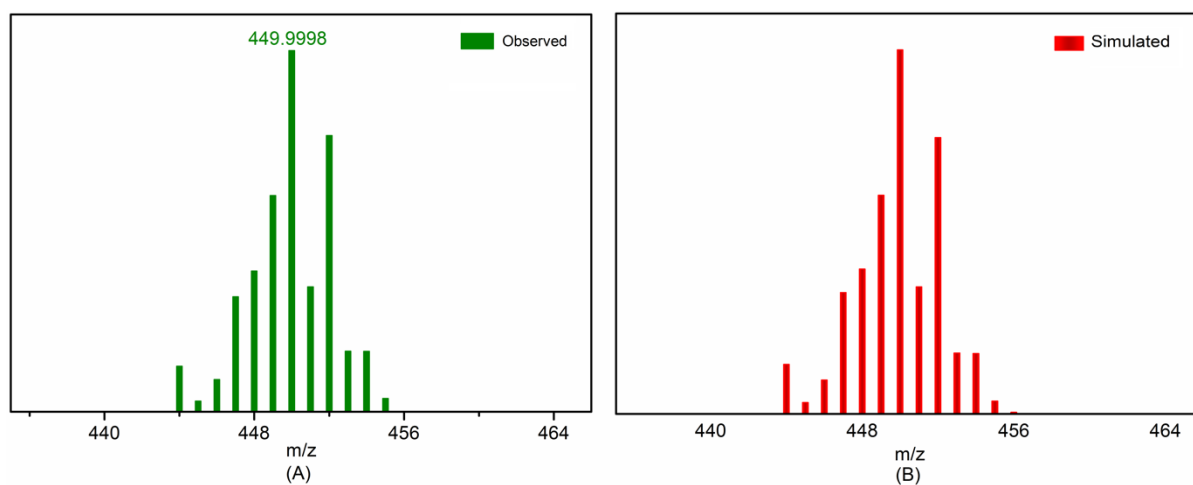

**Figure S24:** ESI-MS expanded spectra of complex  $(\text{Ph}^2\text{NNN})\text{RuCl}_2(\text{CO})$  (**2d**) at  $m/z$  449.9998 (A) Observed (B) Simulated.

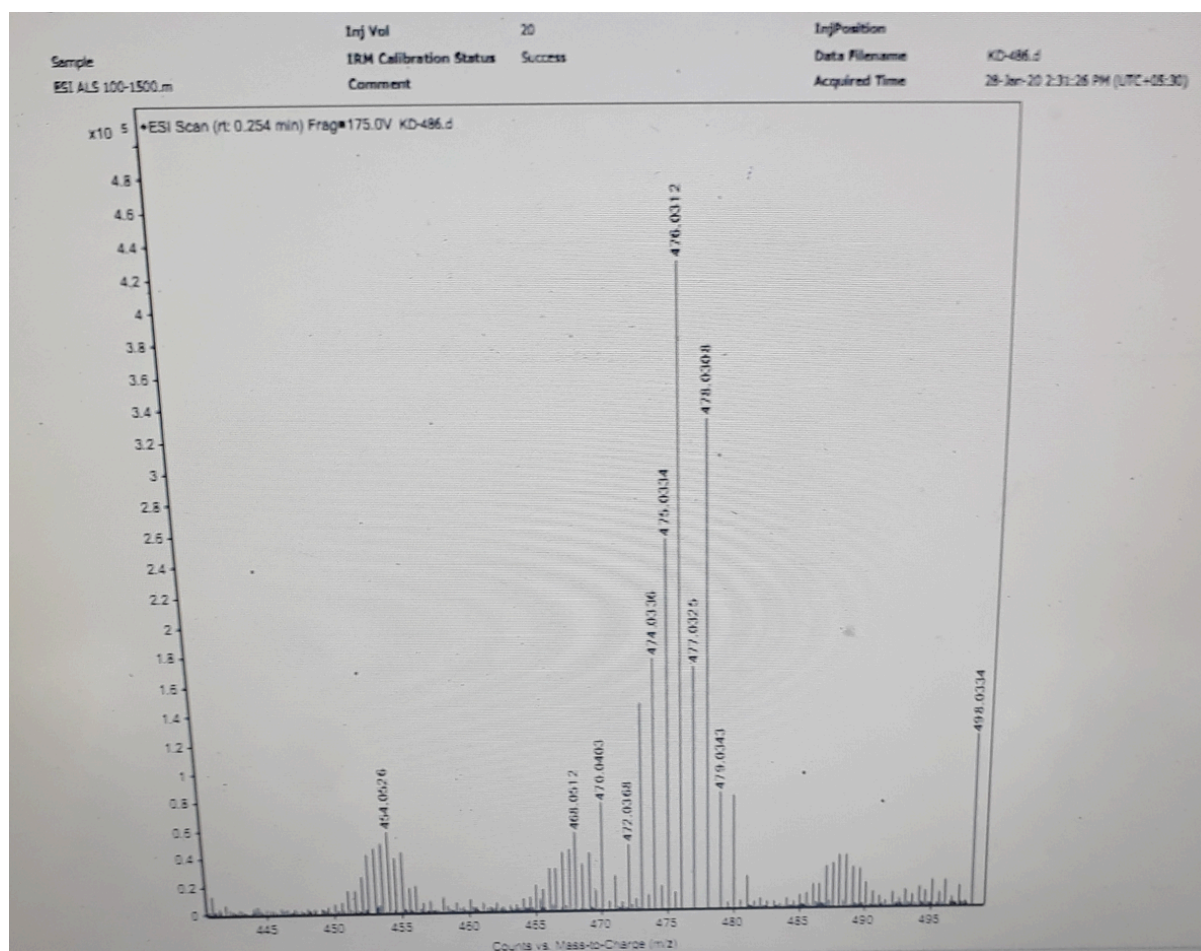

**Figure S25:** ESI-MS full spectra of complex ( $\text{Bim}^2\text{NNN}$ ) $\text{RuCl}_2(\text{CO})$  (**2e**)

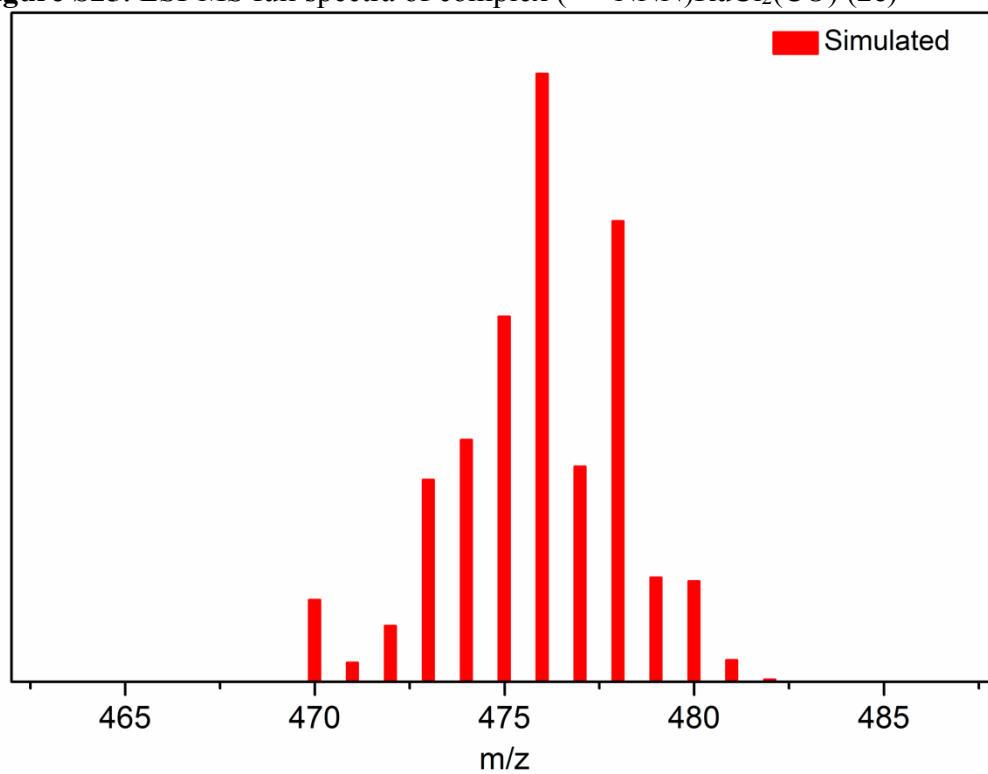

**Figure S26:** ESI-MS spectra of complex ( $\text{Bim}^2\text{NNN}$ ) $\text{RuCl}_2(\text{CO})$  (**2e**) at  $m/z$  475.9884 (Simulated).

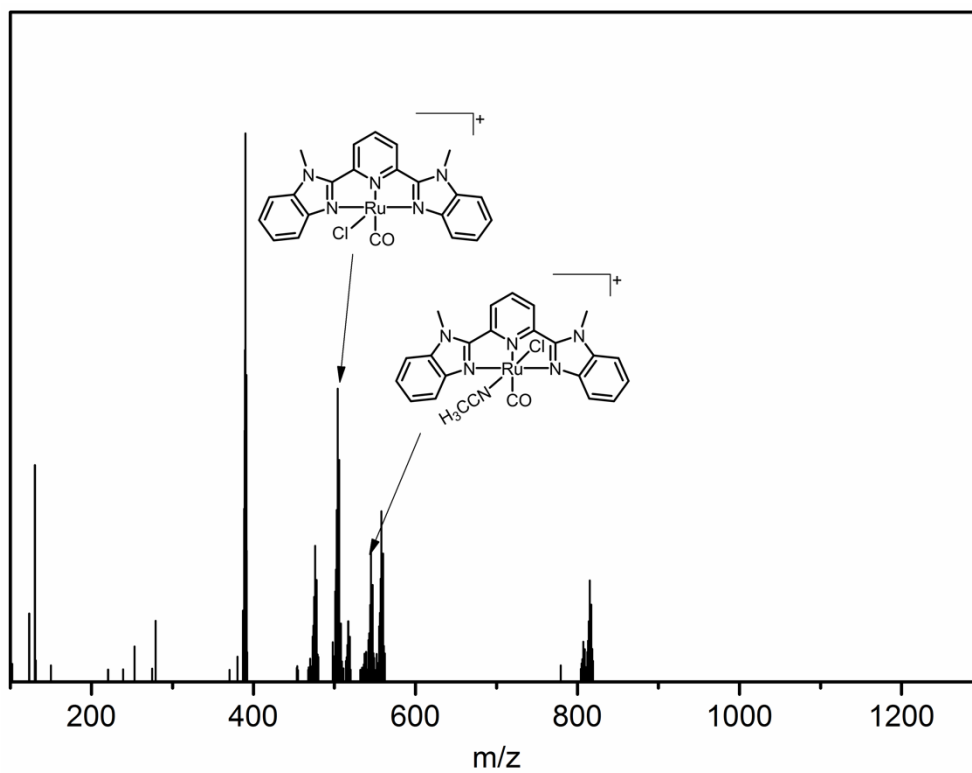

**Figure S27:** ESI-MS full spectra of complex  $(^{\text{MeBim}^2}\text{NNN})\text{RuCl}_2(\text{CO})$  (**2f**)

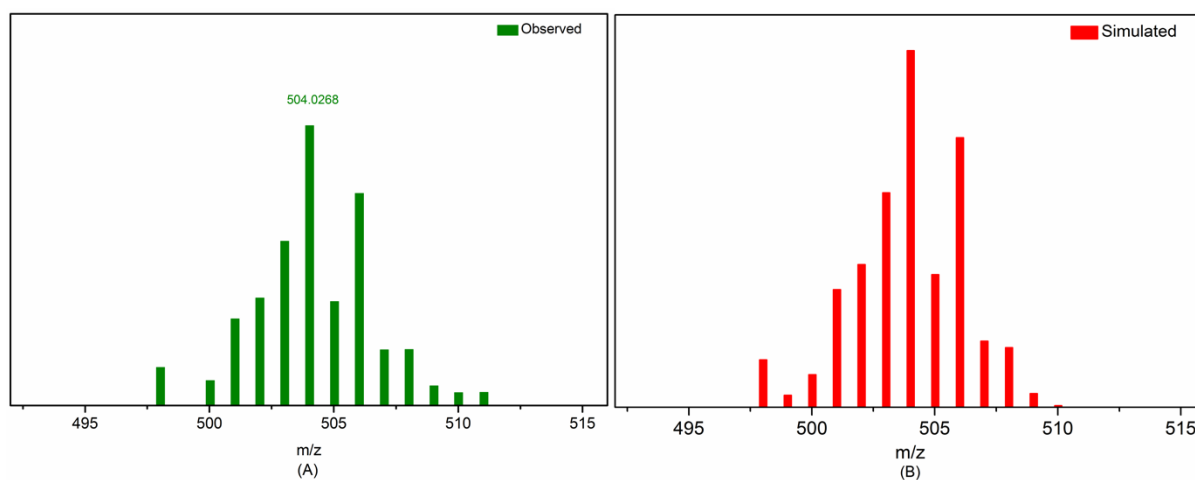

**Figure S28:** ESI-MS expanded spectra of complex  $(^{\text{MeBim}^2}\text{NNN})\text{RuCl}_2(\text{CO})$  (**2f**) at  $m/z$  504.0268 (A) Observed (B) Simulated.

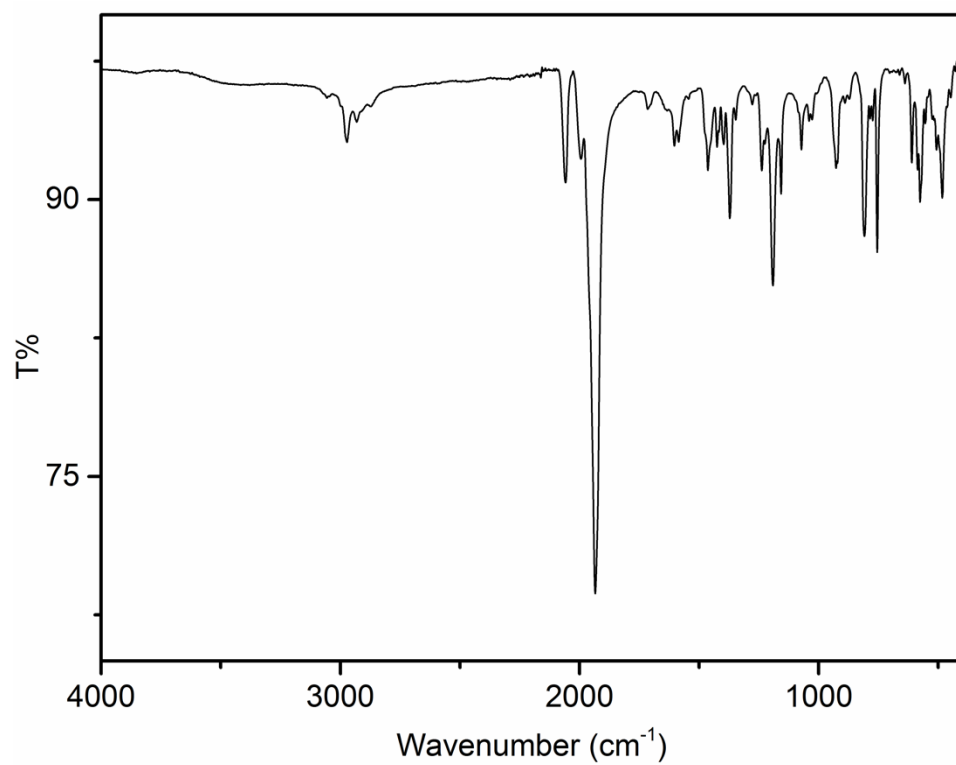

**Figure S29:** IR spectra of complex (<sup>t</sup>Bu<sub>2</sub>NNN)RuCl<sub>2</sub>(CO) (**2a**)

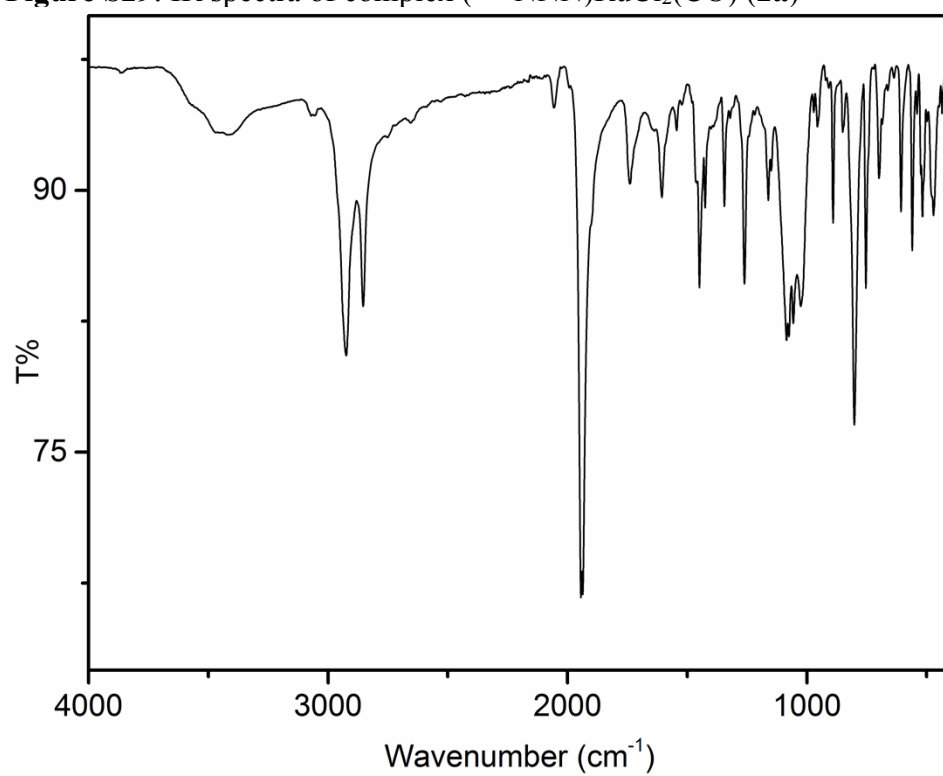

**Figure S30:** IR spectra of complex (<sup>Cy</sup><sub>2</sub>NNN)RuCl<sub>2</sub>(CO) (**2b**)

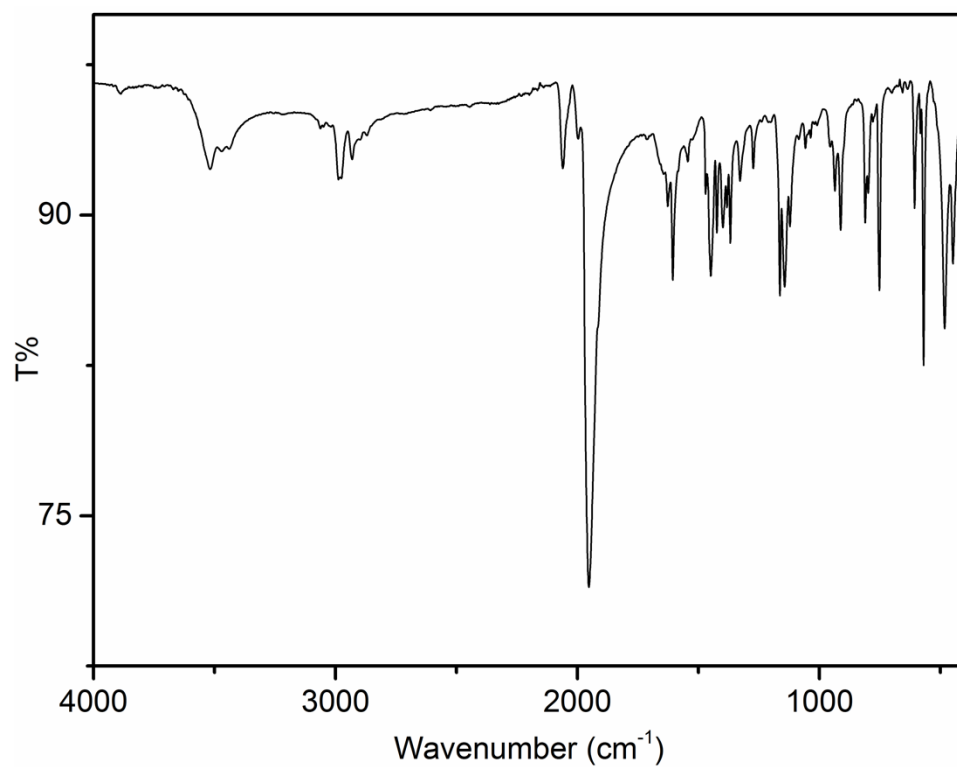

**Figure S31:** IR spectra of complex (<sup>iPr</sup><sub>2</sub>NNN)RuCl<sub>2</sub>(CO) (**2c**)

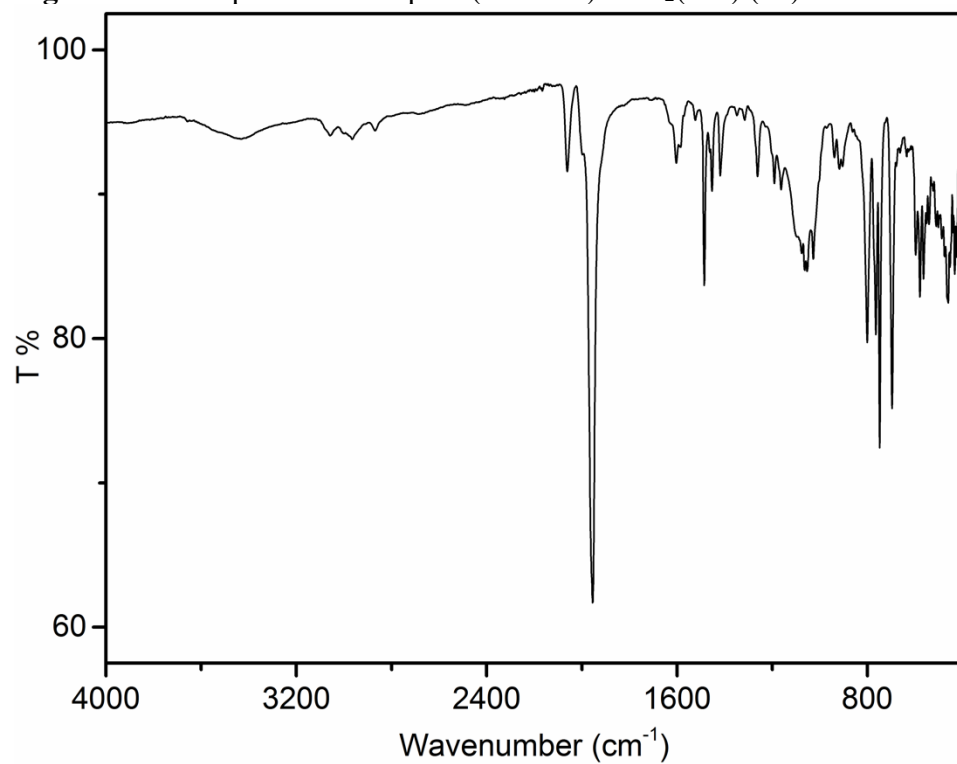

**Figure S32:** IR spectra of complex (<sup>Ph</sup><sub>2</sub>NNN)RuCl<sub>2</sub>(CO) (**2d**)

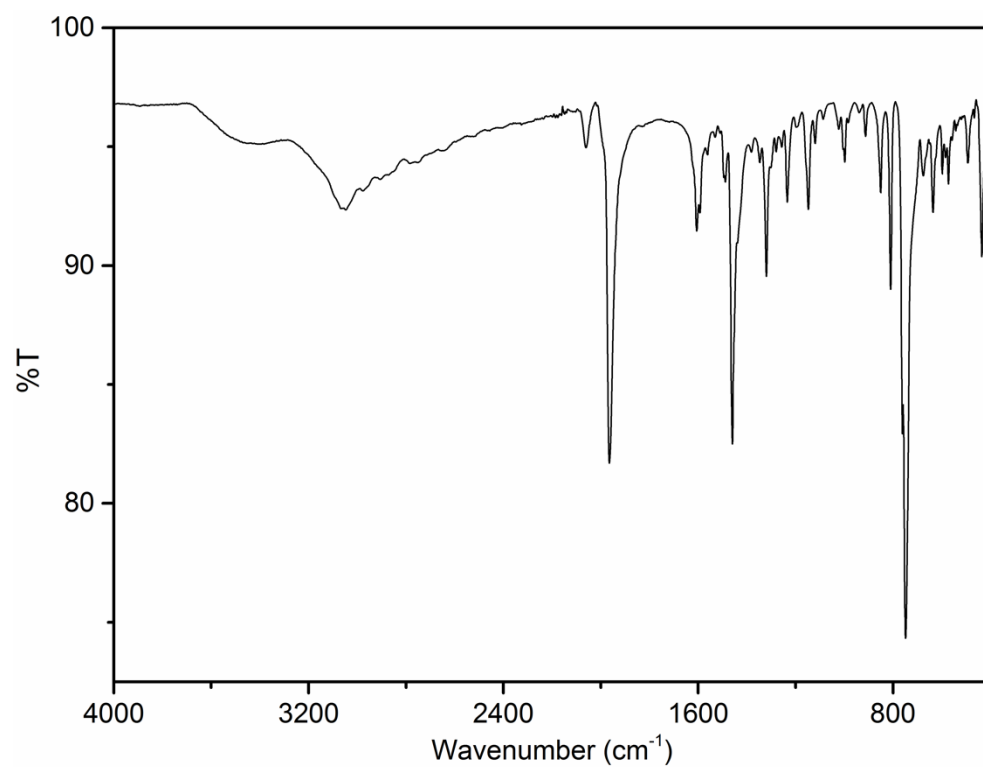

**Figure S33:** IR spectra of complex (<sup>Bim2</sup>NNN)RuCl<sub>2</sub>(CO) (**2e**)

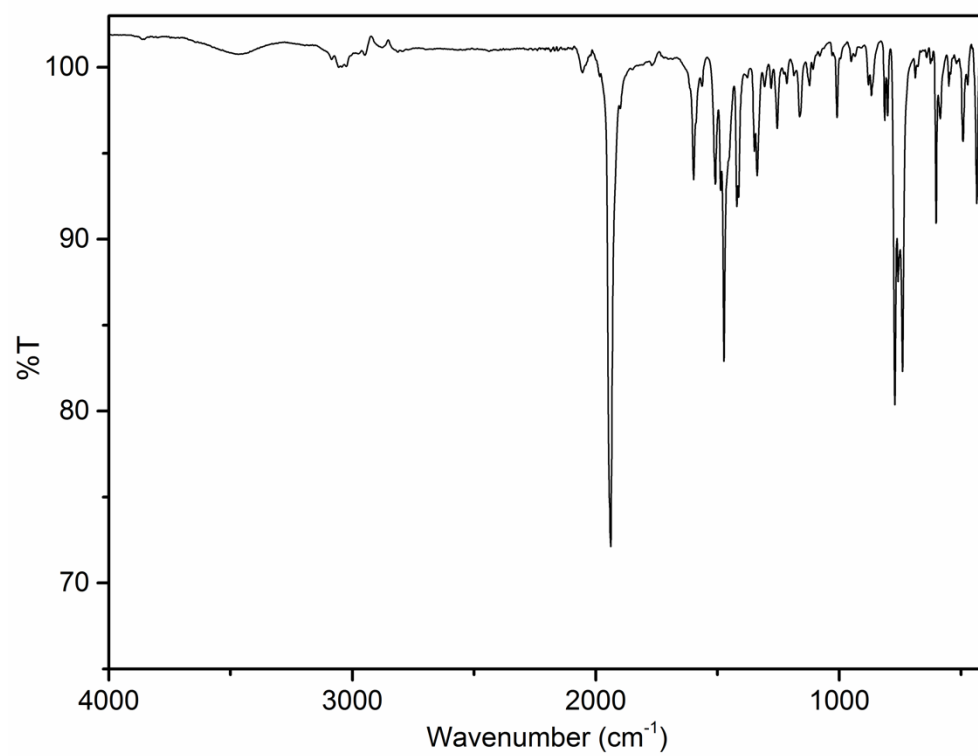

**Figure S34:** IR spectra of complex (<sup>MeBim2</sup>NNN)RuCl<sub>2</sub>(CO) (**2f**)



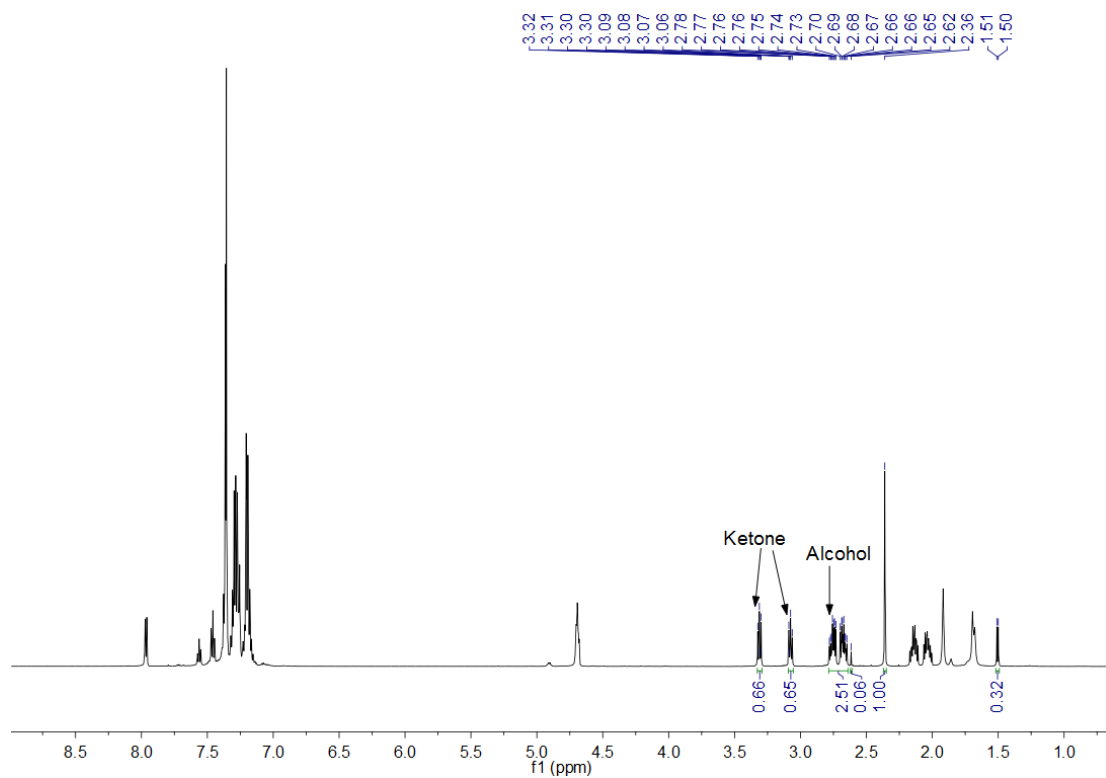

**Figure S35:**  $^1\text{H}$  NMR spectra of  $\beta$ -alkylation of **5** with **4** catalyzed by **2b** ( $^{\text{Cy}}\text{NNN}$ ) $\text{RuCl}_2(\text{CO})$  (0.00025 mol %) at 140 °C (Table 2, entry 1).

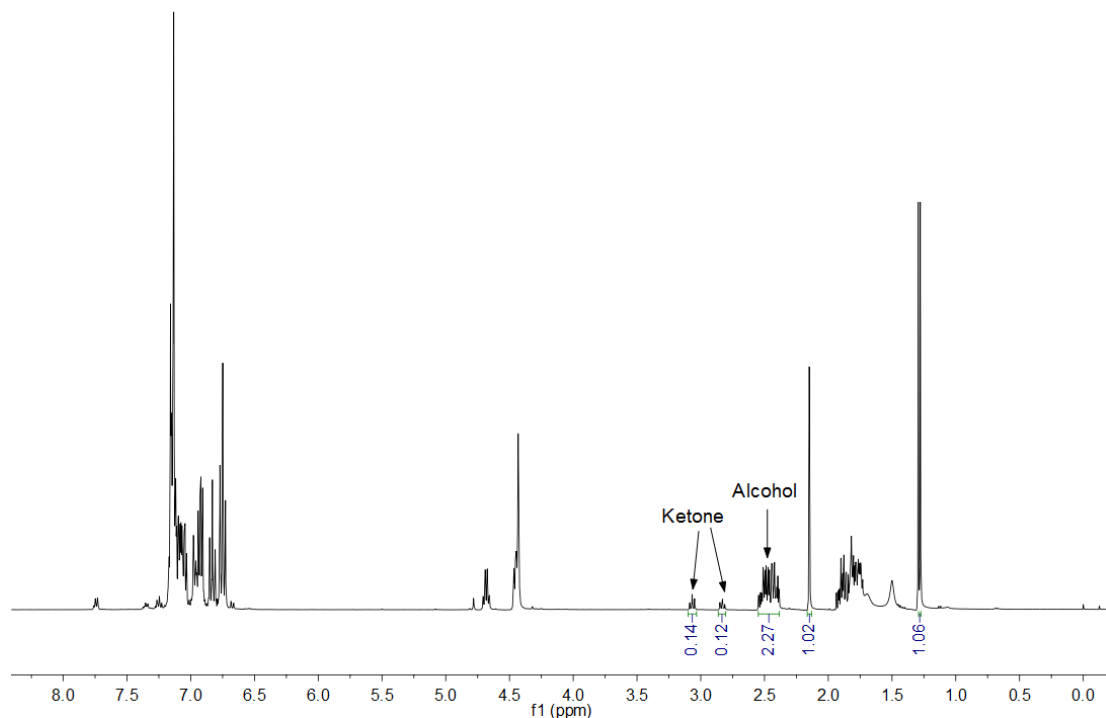

**Figure S36:**  $^1\text{H}$  NMR spectra of  $\beta$ -alkylation of **5a** with **4a** catalyzed by **2b** ( $^{\text{Cy}}\text{NNN}$ ) $\text{RuCl}_2(\text{CO})$  (0.00025 mol %) at 140 °C (Table 2, entry 2).

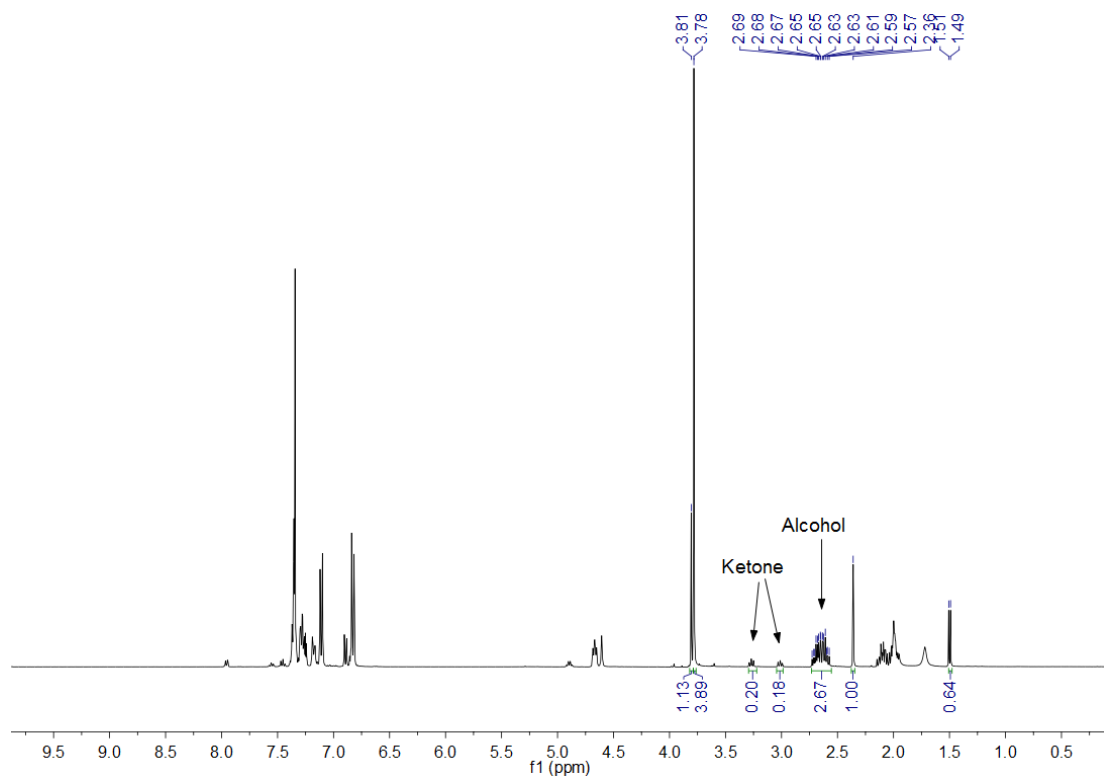

**Figure S37:**  $^1\text{H}$  NMR spectra of  $\beta$ -alkylation of **5b** with **4b** catalyzed by **2b** ( $^{\text{Cy}}\text{NNN}$ ) $\text{RuCl}_2(\text{CO})$  (0.00025 mol %) at 140 °C (Table 2, entry 3).

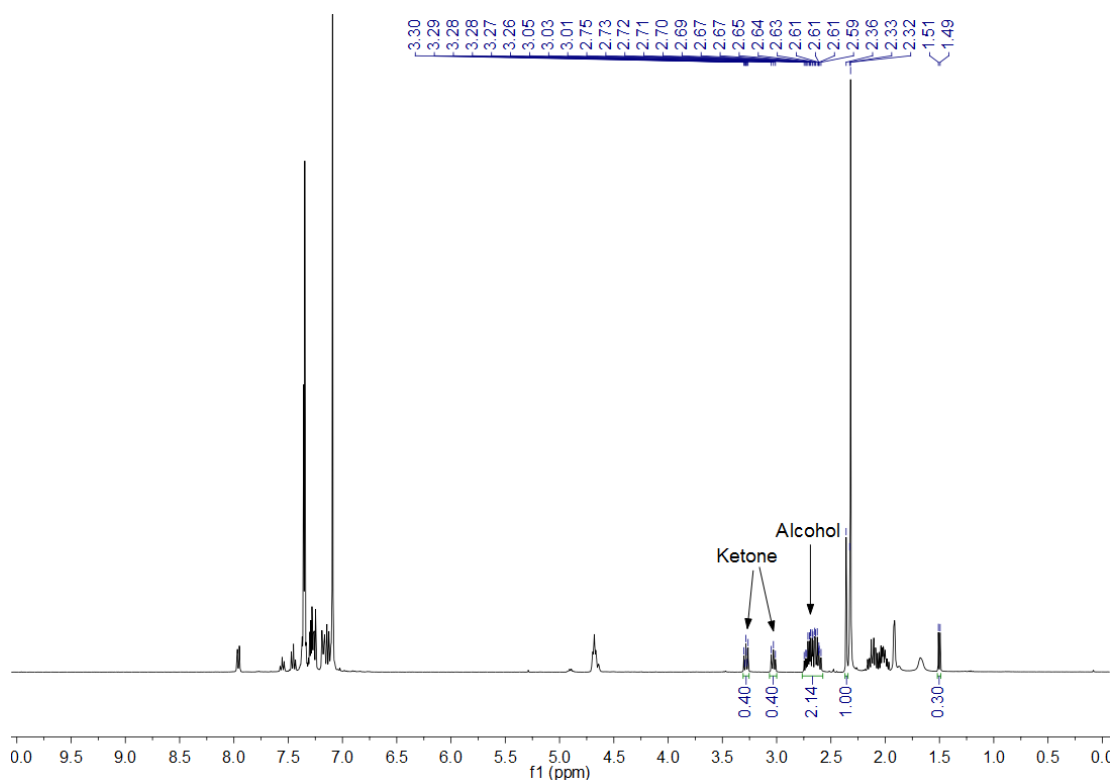

**Figure S38:**  $^1\text{H}$  NMR spectra of  $\beta$ -alkylation of **5c** with **4c** catalyzed by **2b** ( $^{\text{Cy}}\text{NNN}$ ) $\text{RuCl}_2(\text{CO})$  (0.00025 mol %) at 140 °C (Table 2, entry 4).

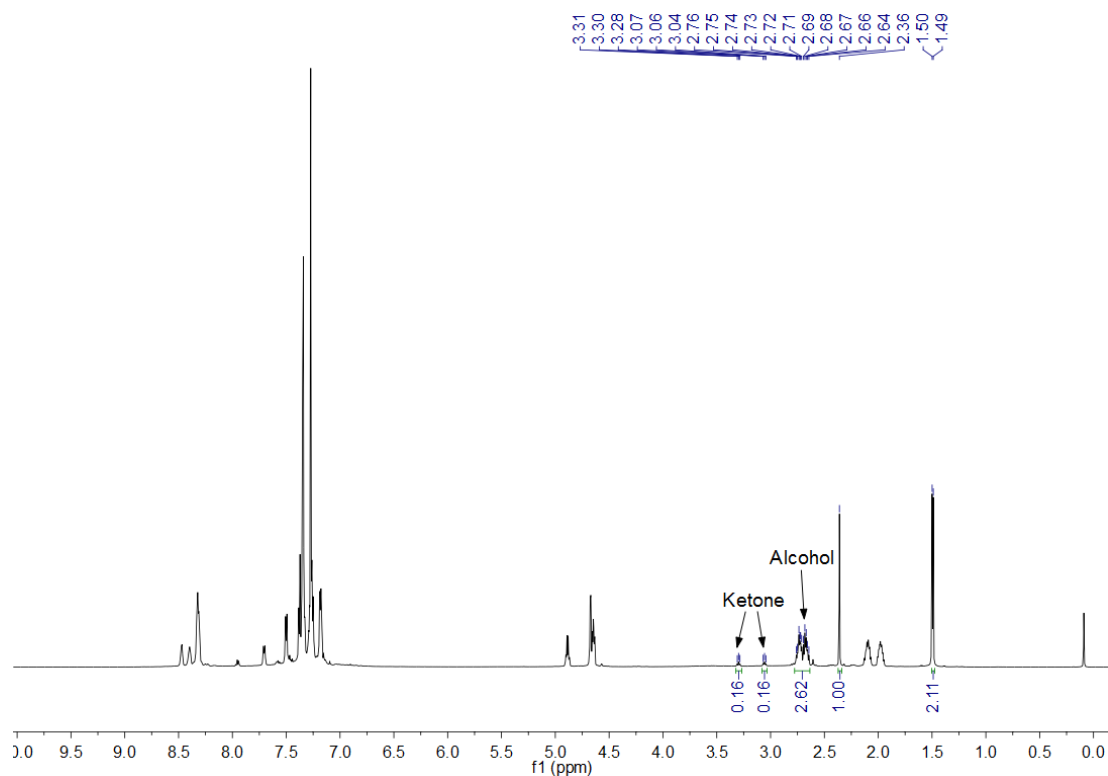

**Figure S39:**  $^1\text{H}$  NMR spectra of  $\beta$ -alkylation of **5d** with **4d** catalyzed by **2b** ( $^{\text{C}}\text{yNNN}$ ) $\text{RuCl}_2(\text{CO})$  (0.025 mol %) at 140  $^\circ\text{C}$  (Table 2, entry 5).

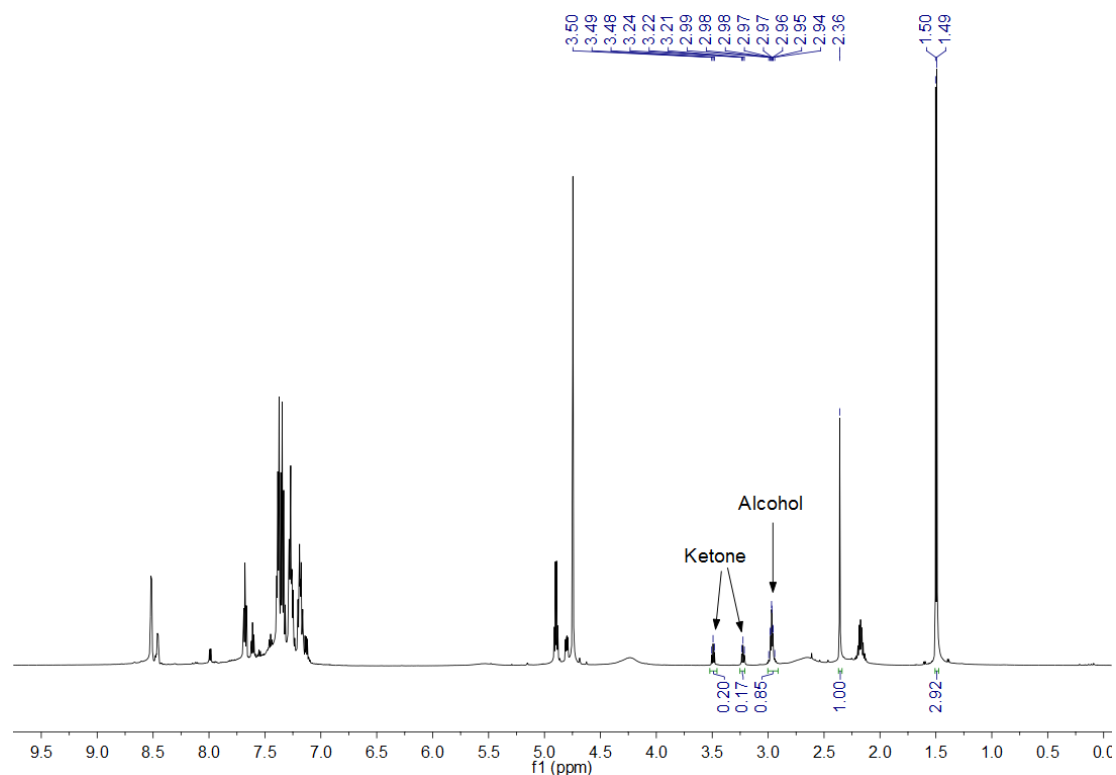

**Figure S40:**  $^1\text{H}$  NMR spectra of  $\beta$ -alkylation of **5e** with **4e** catalyzed by **2b** ( $^{\text{C}}\text{yNNN}$ ) $\text{RuCl}_2(\text{CO})$  (0.025 mol %) at 140  $^\circ\text{C}$  (Table 2, entry 6).

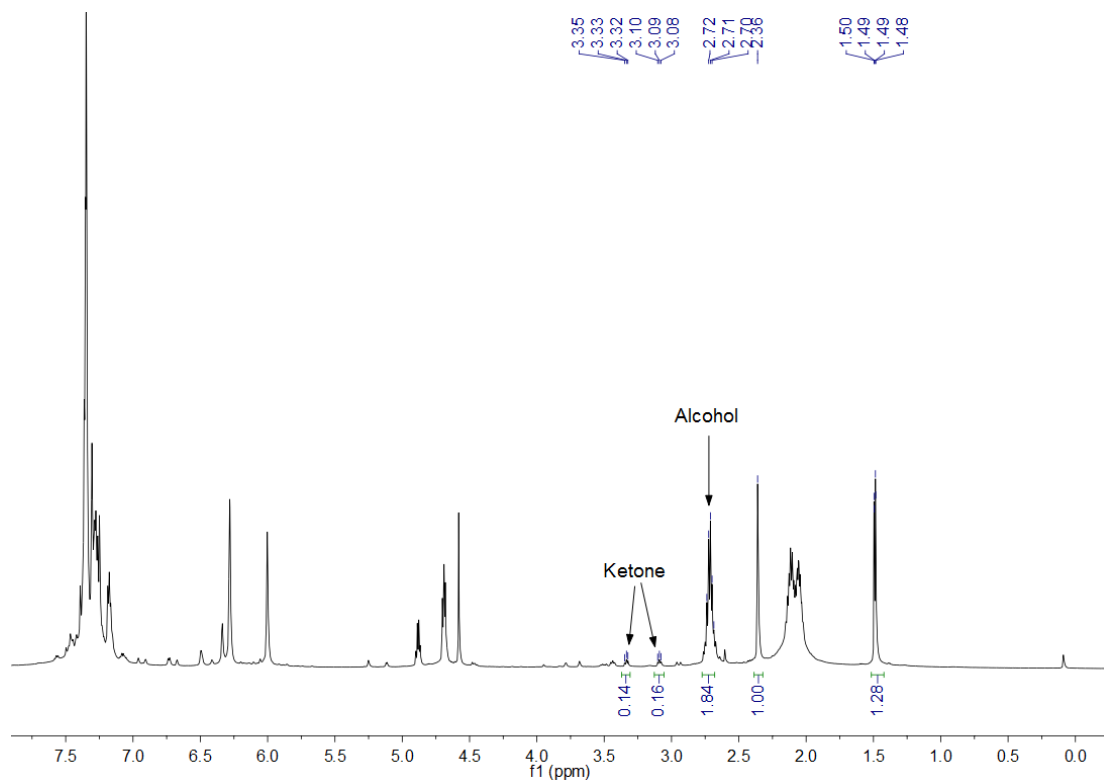

**Figure S41:**  $^1\text{H}$  NMR spectra of  $\beta$ -alkylation of **5f** with **4f** catalyzed by **2b** ( $^{\text{Cy}}\text{NNN}$ ) $\text{RuCl}_2(\text{CO})$  (0.00025 mol %) at 140  $^\circ\text{C}$  (Table 2, entry 7).

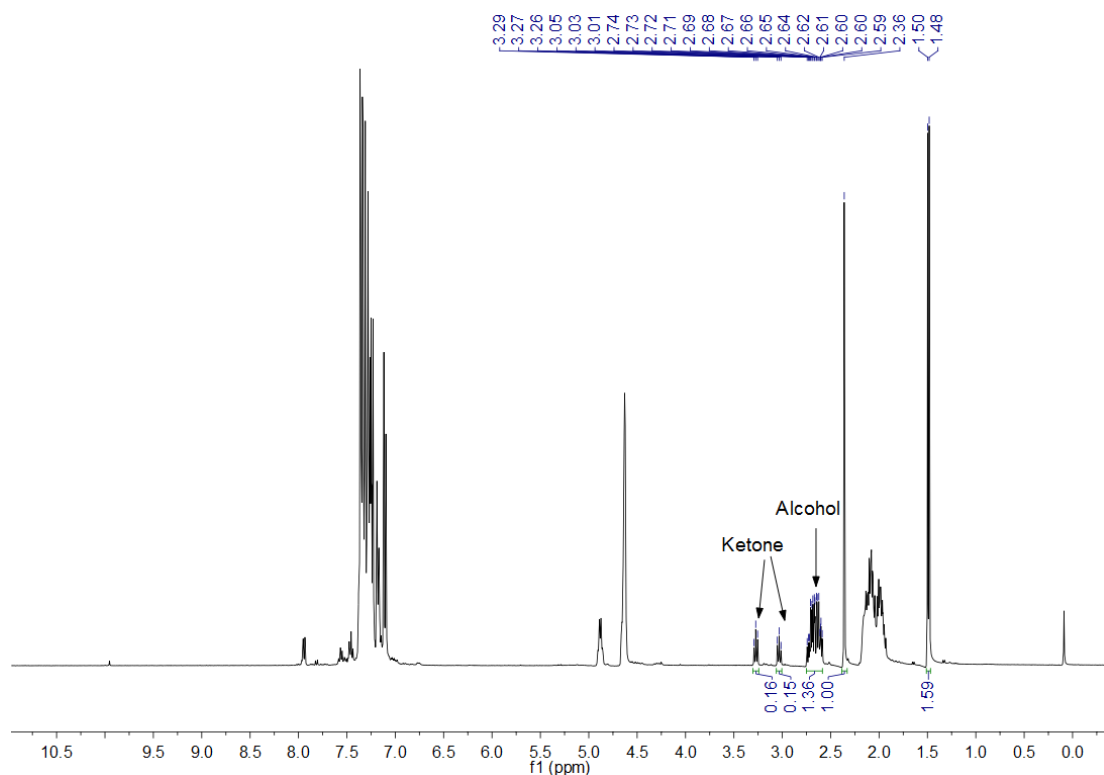

**Figure S42:**  $^1\text{H}$  NMR spectra of  $\beta$ -alkylation of **5g** with **4g** catalyzed by **2b** ( $^{\text{Cy}}\text{NNN}$ ) $\text{RuCl}_2(\text{CO})$  (0.00025 mol %) at 140  $^\circ\text{C}$  (Table 2, entry 8).

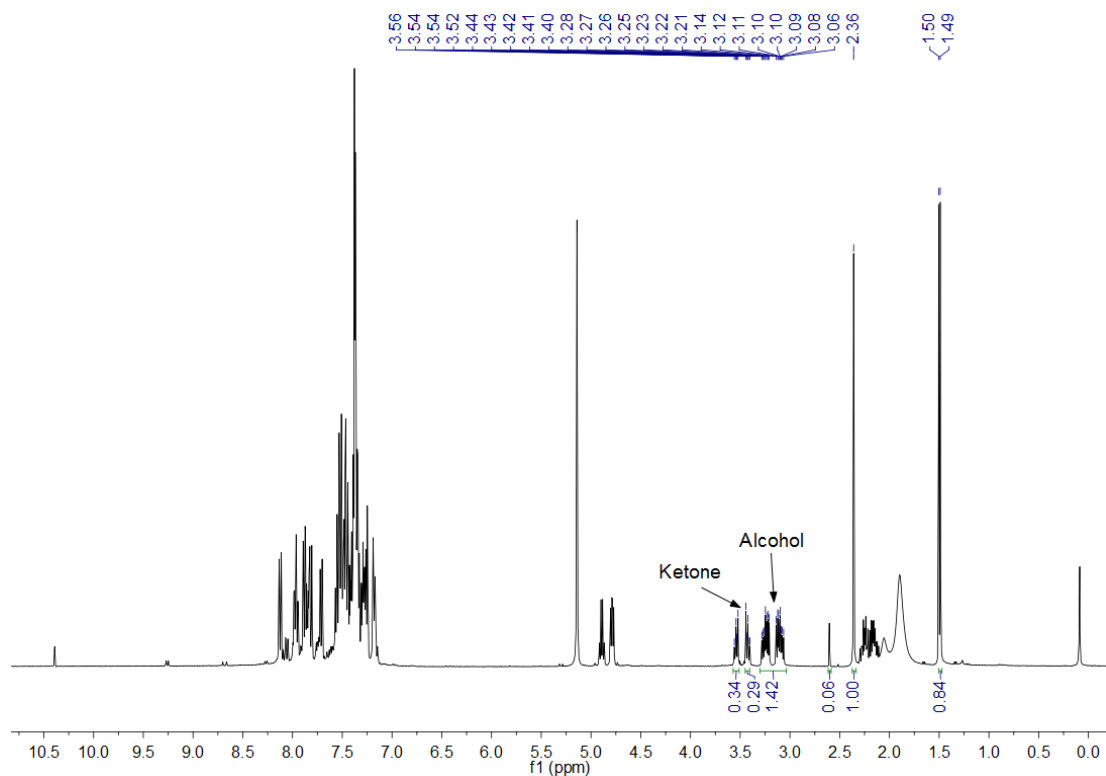

**Figure S43:**  $^1\text{H}$  NMR spectra of  $\beta$ -alkylation of **5h** with **4h** catalyzed by **2b** ( $^{\text{Cy}}\text{NNN}$ ) $\text{RuCl}_2(\text{CO})$  (0.00025 mol %) at 140  $^\circ\text{C}$  (Table 2, entry 9).

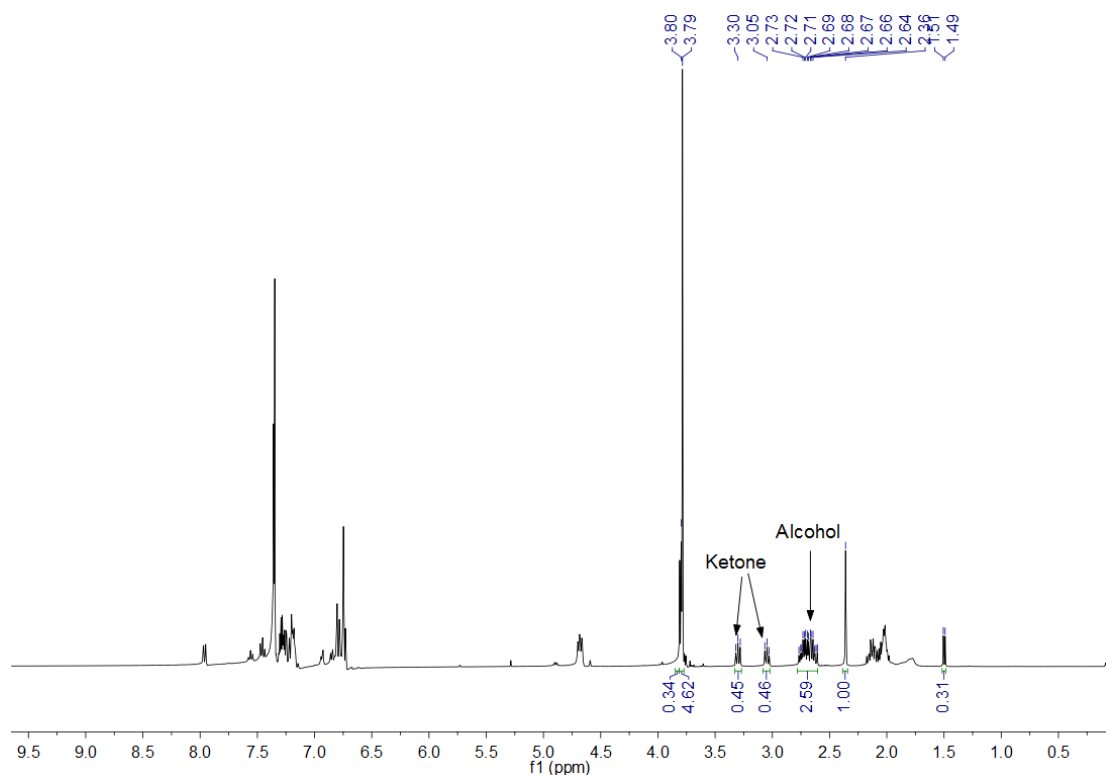

**Figure S44:**  $^1\text{H}$  NMR spectra of  $\beta$ -alkylation of **5i** with **4i** catalyzed by **2b** ( $^{\text{Cy}}\text{NNN}$ ) $\text{RuCl}_2(\text{CO})$  (0.00025 mol %) at 140  $^\circ\text{C}$  (Table 2, entry 10).

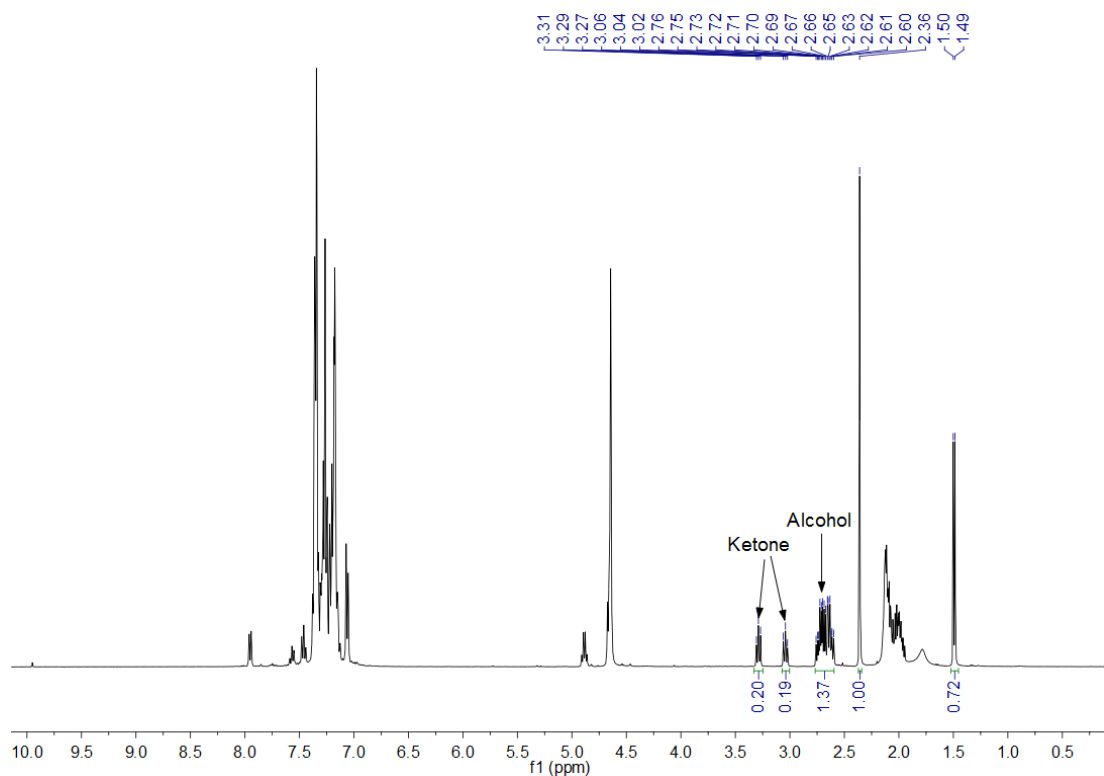

**Figure S45:**  $^1\text{H}$  NMR spectra of  $\beta$ -alkylation of **5j** with **4j** catalyzed by **2b** ( $^{\text{Cy}}\text{NNN}$ ) $\text{RuCl}_2(\text{CO})$  (0.00025 mol %) at 140  $^\circ\text{C}$  (Table 2, entry 11).

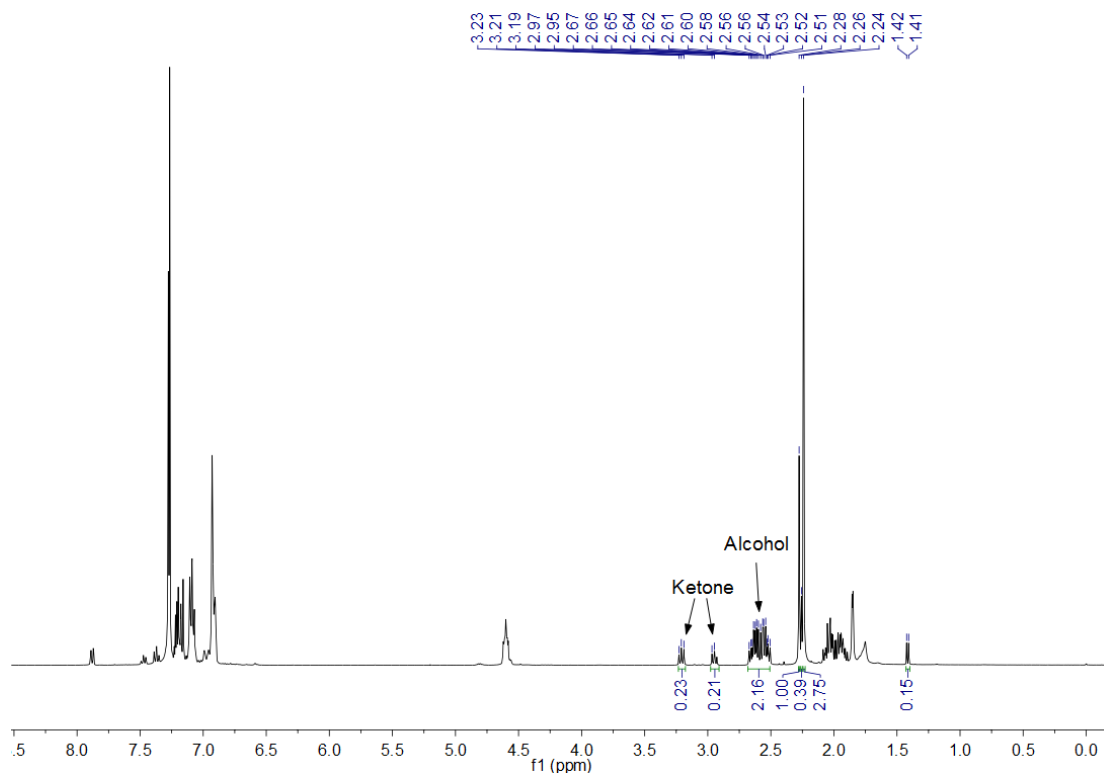

**Figure S46:**  $^1\text{H}$  NMR spectra of  $\beta$ -alkylation of **5k** with **4k** catalyzed by **2b** ( $^{\text{Cy}}\text{NNN}$ ) $\text{RuCl}_2(\text{CO})$  (0.00025 mol %) at 140  $^\circ\text{C}$  (Table 2, entry 12).

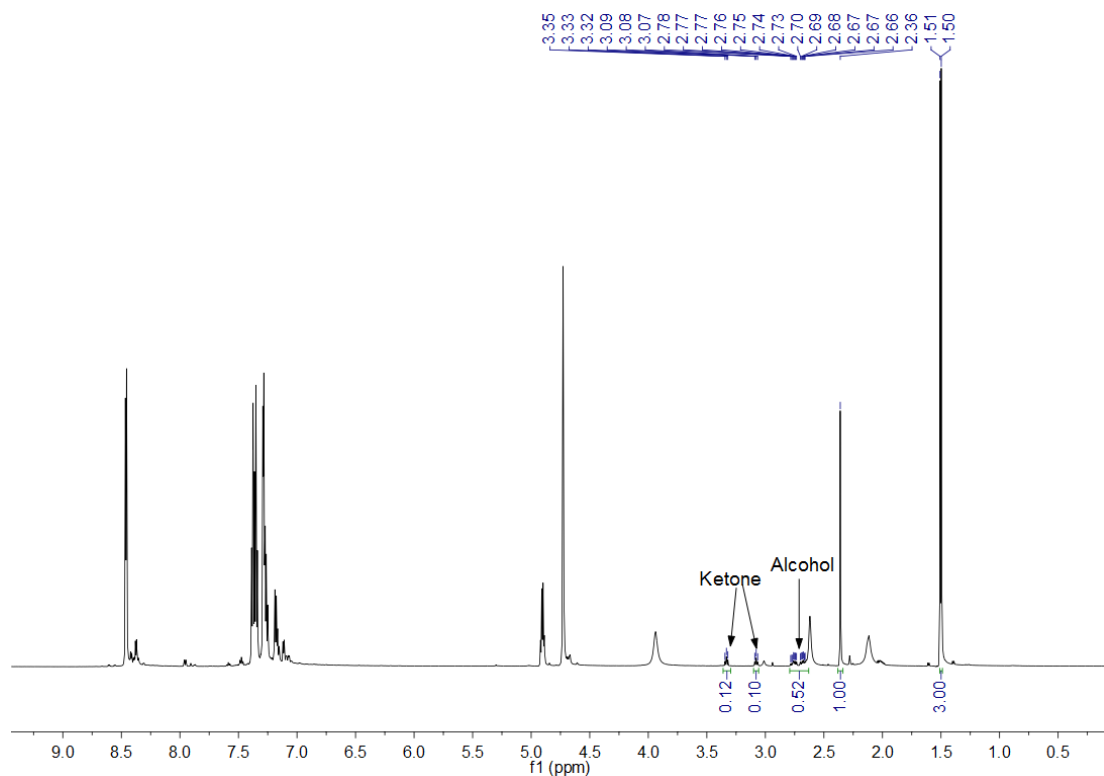

**Figure S47:**  $^1\text{H}$  NMR spectra of  $\beta$ -alkylation of **5l** with **4l** catalyzed by **2b** ( $^{\text{Cy}}\text{NNN}$ ) $\text{RuCl}_2(\text{CO})$  (0.00025 mol %) at 140  $^\circ\text{C}$  (Table 2, entry 13).

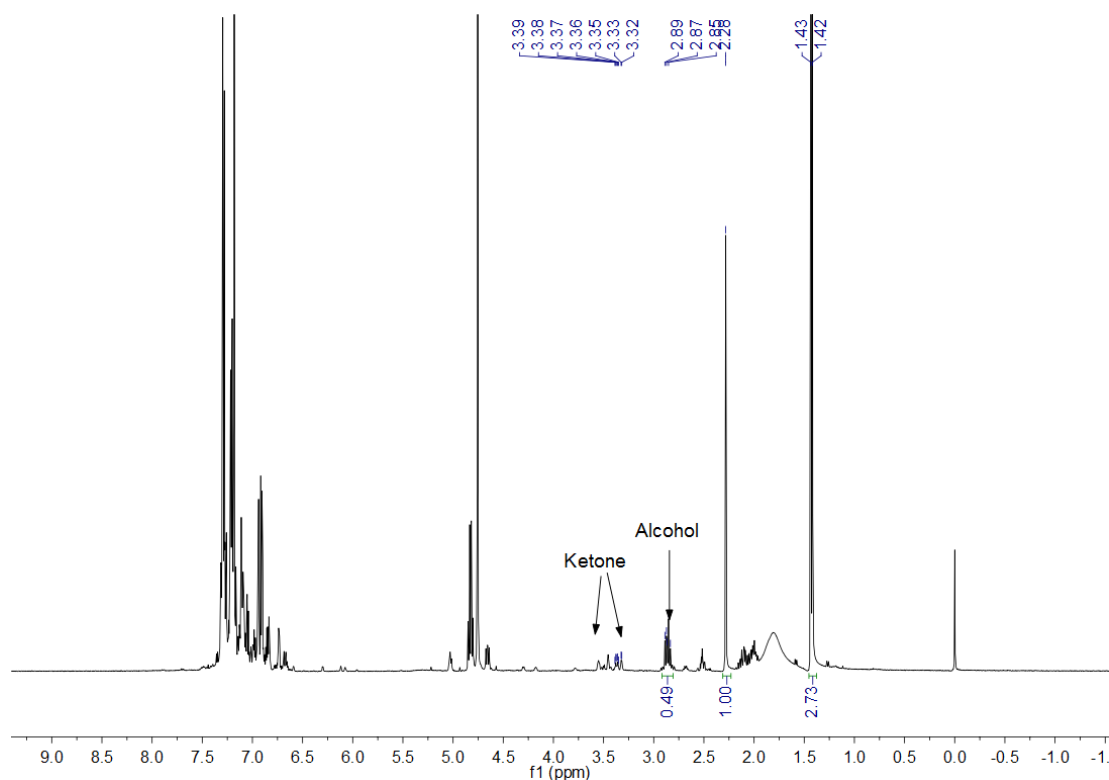

**Figure S48:**  $^1\text{H}$  NMR spectra of  $\beta$ -alkylation of **5m** with **4m** catalyzed by **2b** ( $^{\text{Cy}}\text{NNN}$ ) $\text{RuCl}_2(\text{CO})$  (0.025 mol %) at 140  $^\circ\text{C}$  (Table 2, entry 14).

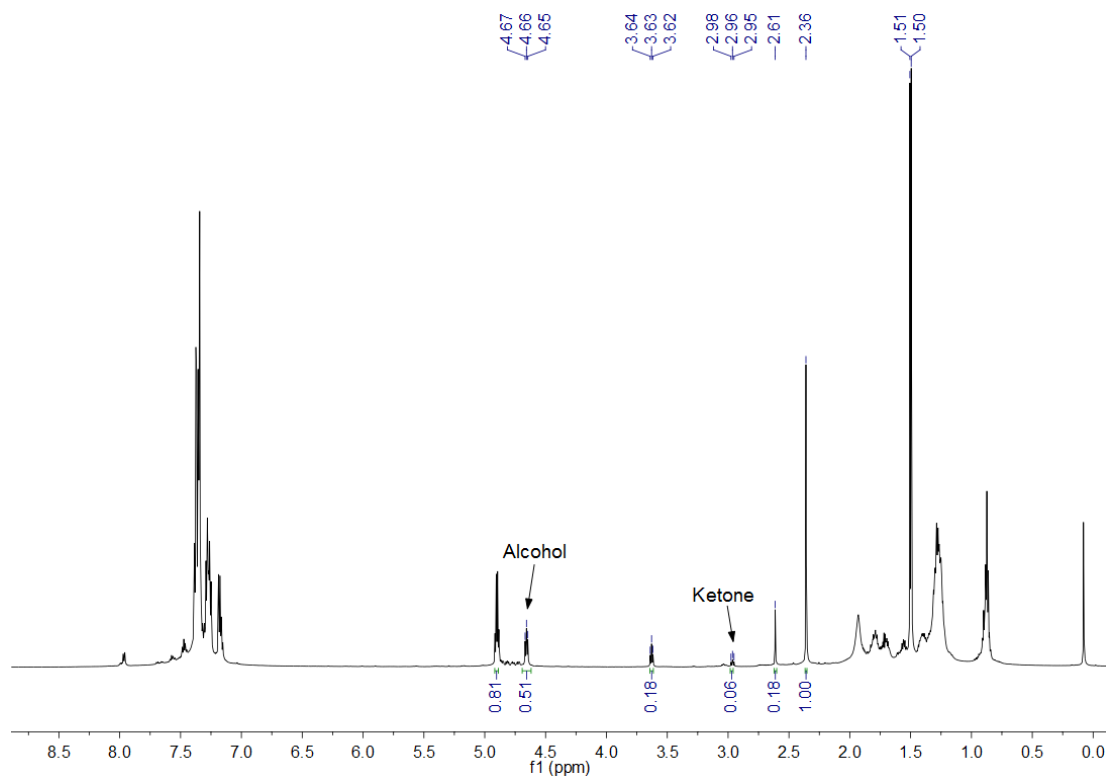

**Figure S49:**  $^1\text{H}$  NMR spectra of  $\beta$ -alkylation of **5n** with **4n** catalyzed by **2b** ( $^{\text{Cy}}\text{NNN}$ ) $\text{RuCl}_2(\text{CO})$  (0.00025 mol %) at 140 °C (Table 2, entry 15).

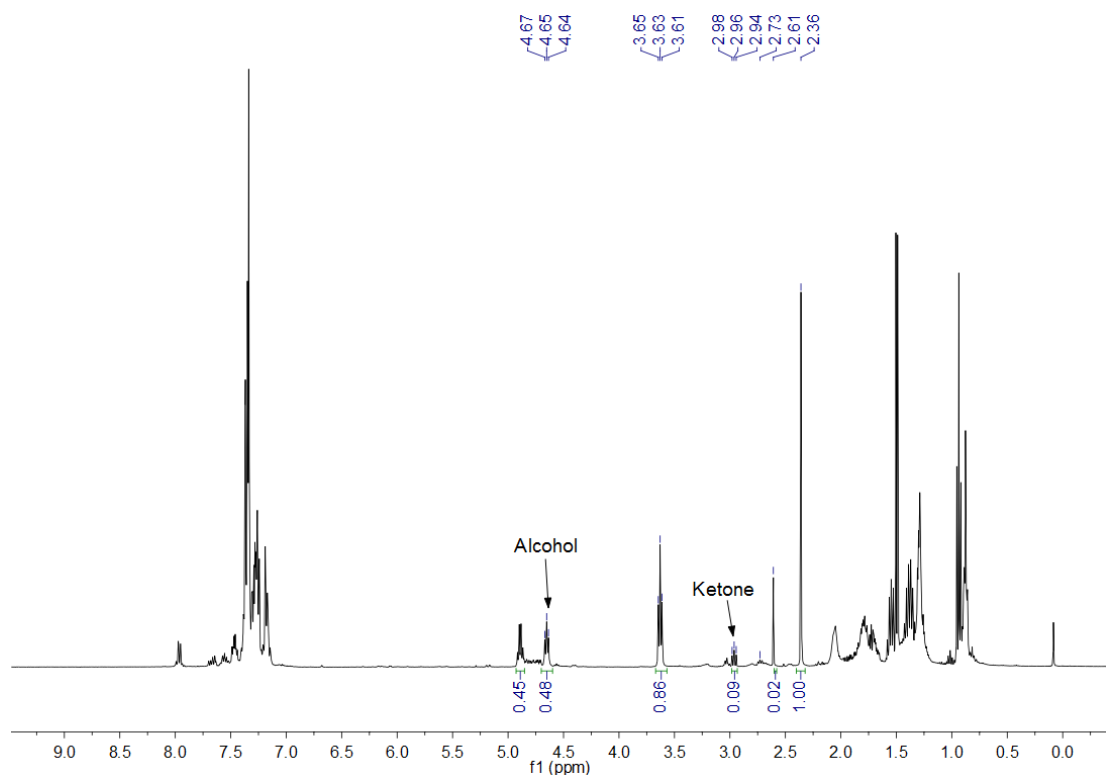

**Figure S50:**  $^1\text{H}$  NMR spectra of  $\beta$ -alkylation of **5o** with **4o** catalyzed by **2b** ( $^{\text{Cy}}\text{NNN}$ ) $\text{RuCl}_2(\text{CO})$  (0.025 mol %) at 140 °C (Table 2, entry 16).





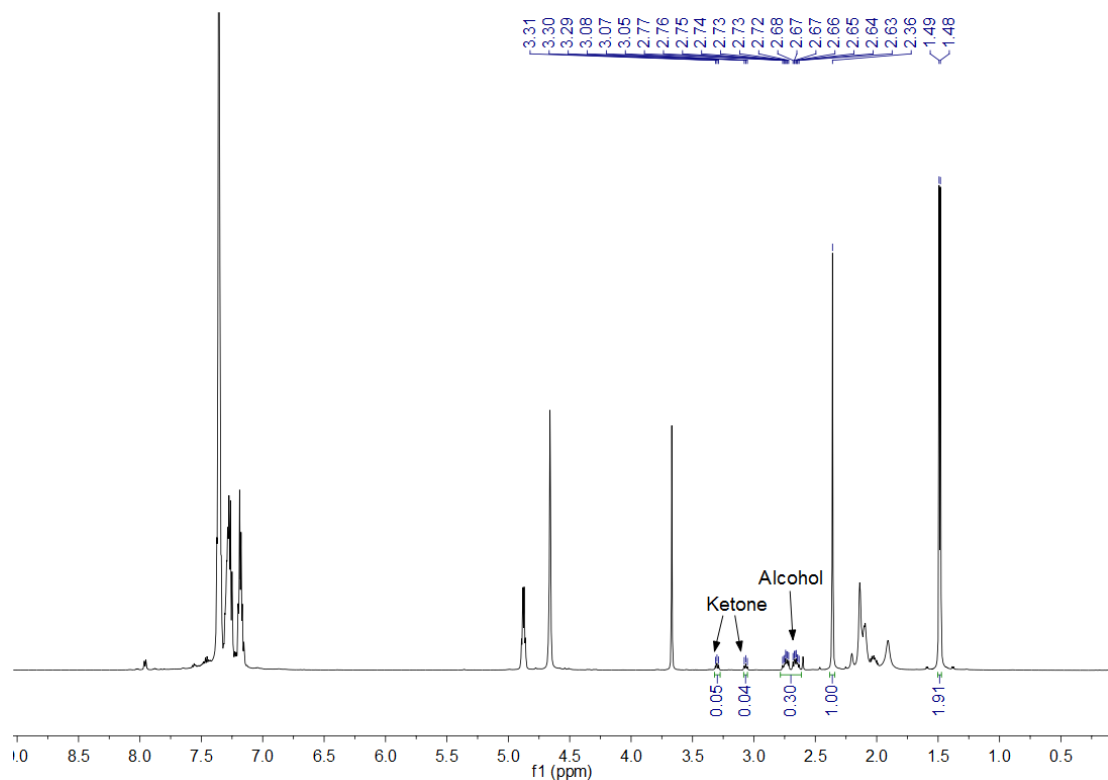

**Figure S53:**  $^1\text{H}$  NMR spectra of  $\beta$ -alkylation of **5r** with **4r** catalyzed by **2b** ( $^{\text{Cy}}\text{NNN}$ ) $\text{RuCl}_2(\text{CO})$  (0.00025 mol %) at 140  $^\circ\text{C}$  (Table 2, entry 19).

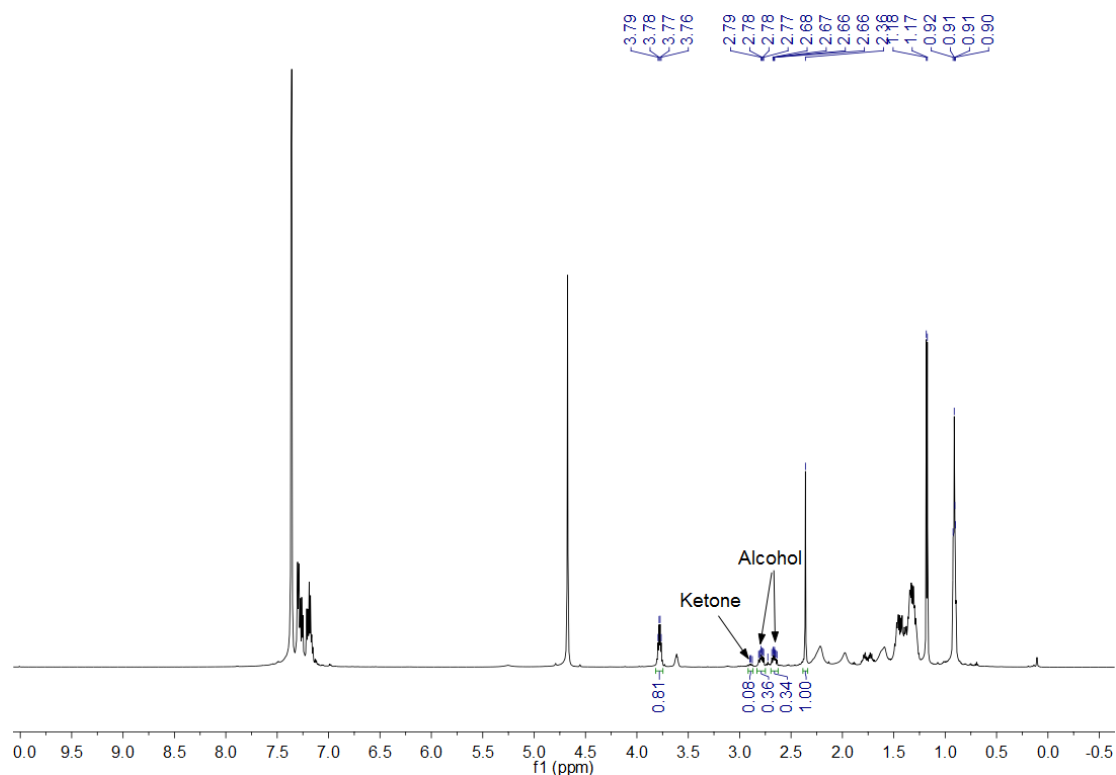

**Figure S54:**  $^1\text{H}$  NMR spectra of  $\beta$ -alkylation of **5s** with **4s** catalyzed by **2b** ( $^{\text{Cy}}\text{NNN}$ ) $\text{RuCl}_2(\text{CO})$  (0.00025 mol %) at 140  $^\circ\text{C}$  (Table 2, entry 20).

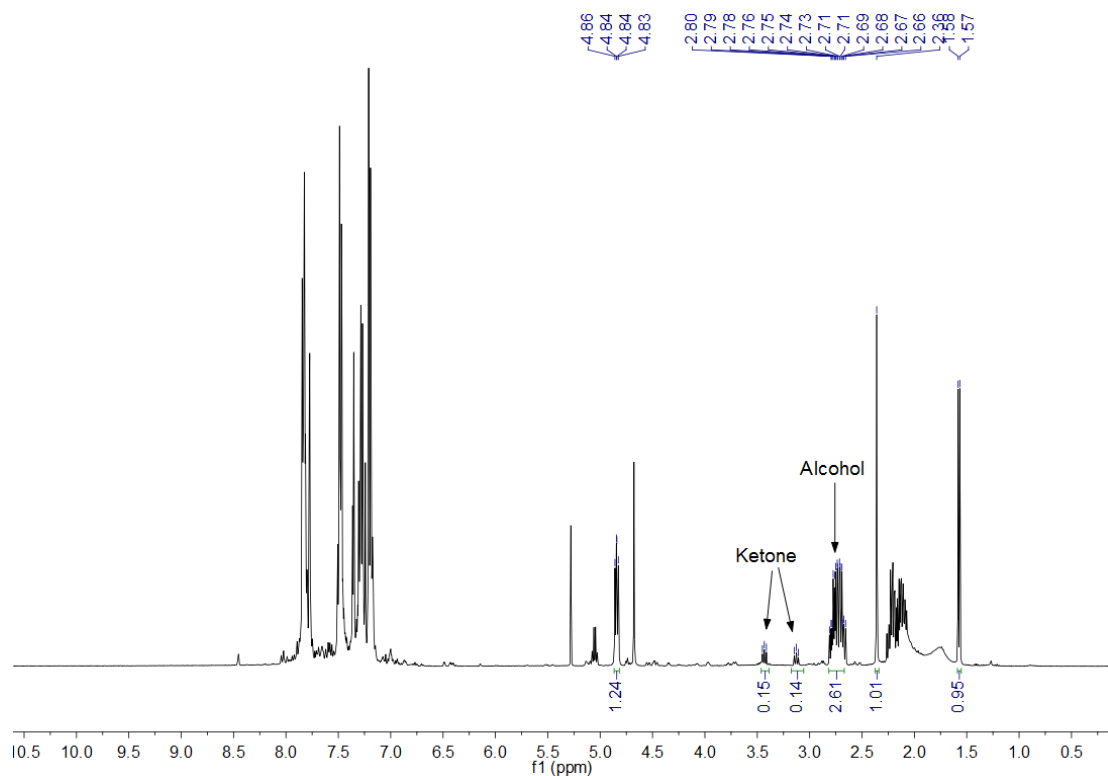

**Figure S55:**  $^1\text{H}$  NMR spectra of  $\beta$ -alkylation of **5t** with **4t** catalyzed by **2b** ( $^{\text{Cy}}\text{NNN}$ ) $\text{RuCl}_2(\text{CO})$  (0.00025 mol %) at 140  $^\circ\text{C}$  (Table 2, entry 21).

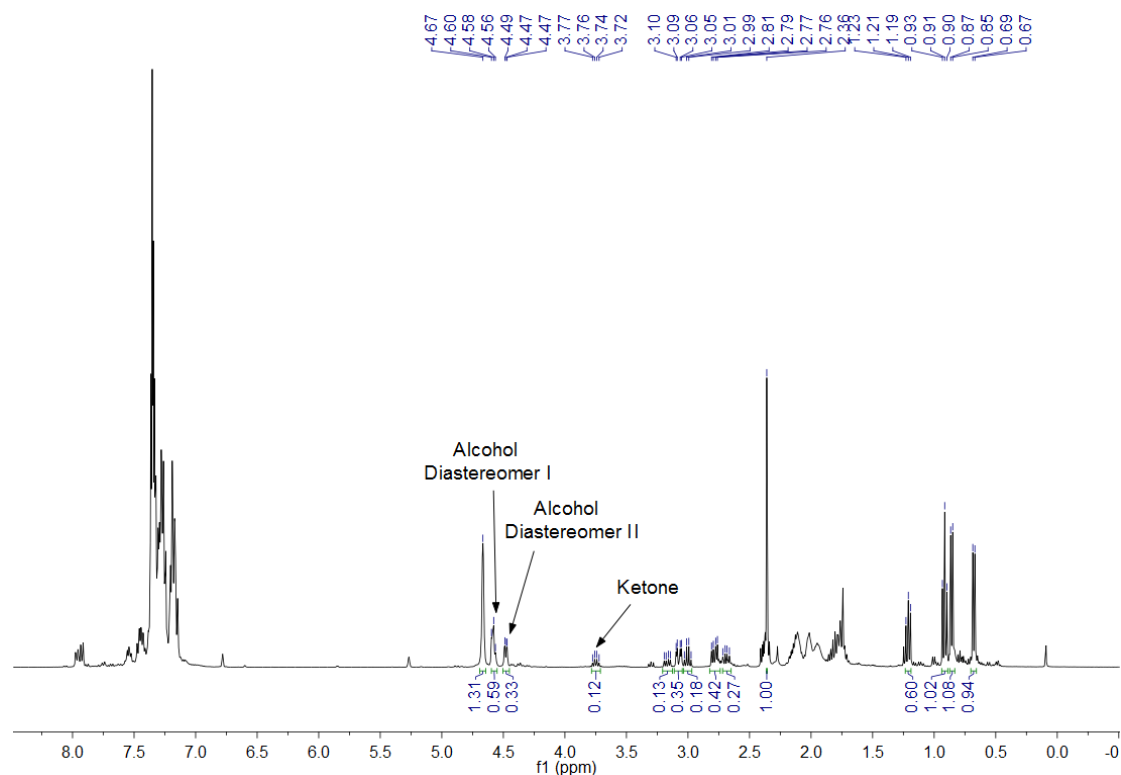

**Figure S56:**  $^1\text{H}$  NMR spectra of  $\beta$ -alkylation of **5u** with **4u** catalyzed by **2b** ( $^{\text{Cy}}\text{NNN}$ ) $\text{RuCl}_2(\text{CO})$  (0.00025 mol %) at 140  $^\circ\text{C}$  (Table 2, entry 22).

## 5. Kinetic Studies

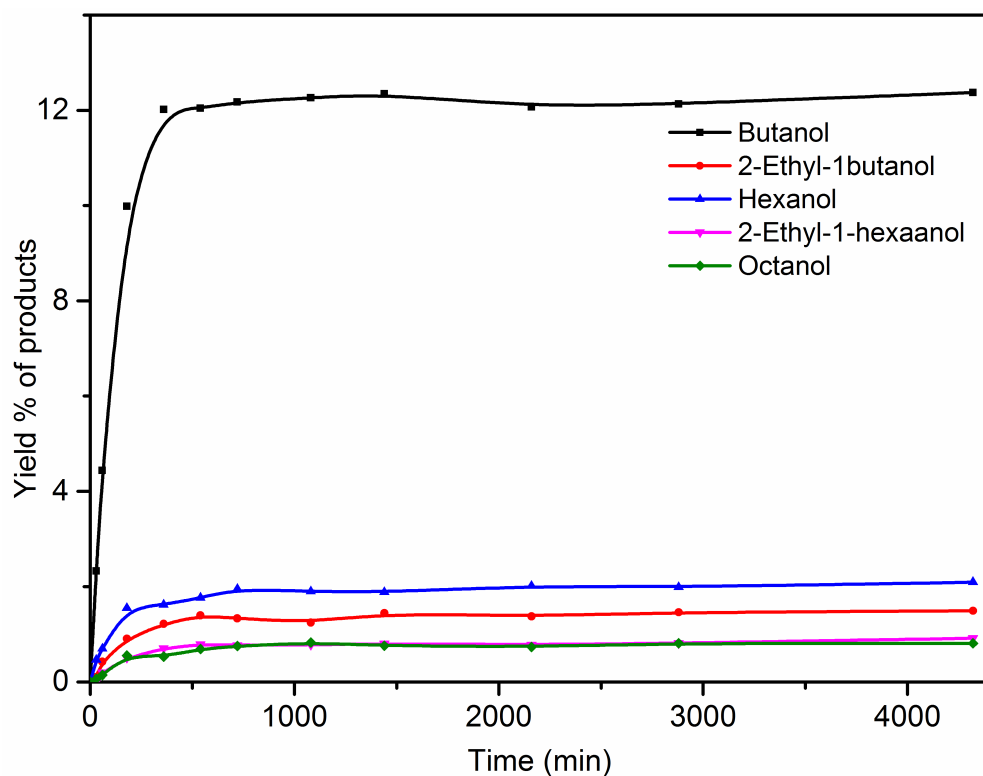

**Figure S57:** Ethanol upgradation to higher alcohol catalyzed by **1a**. Reaction condition: Temperature 140 °C; ethanol = 12.23 M; **1a** = 7.8 mM (Table 3, entry 1).

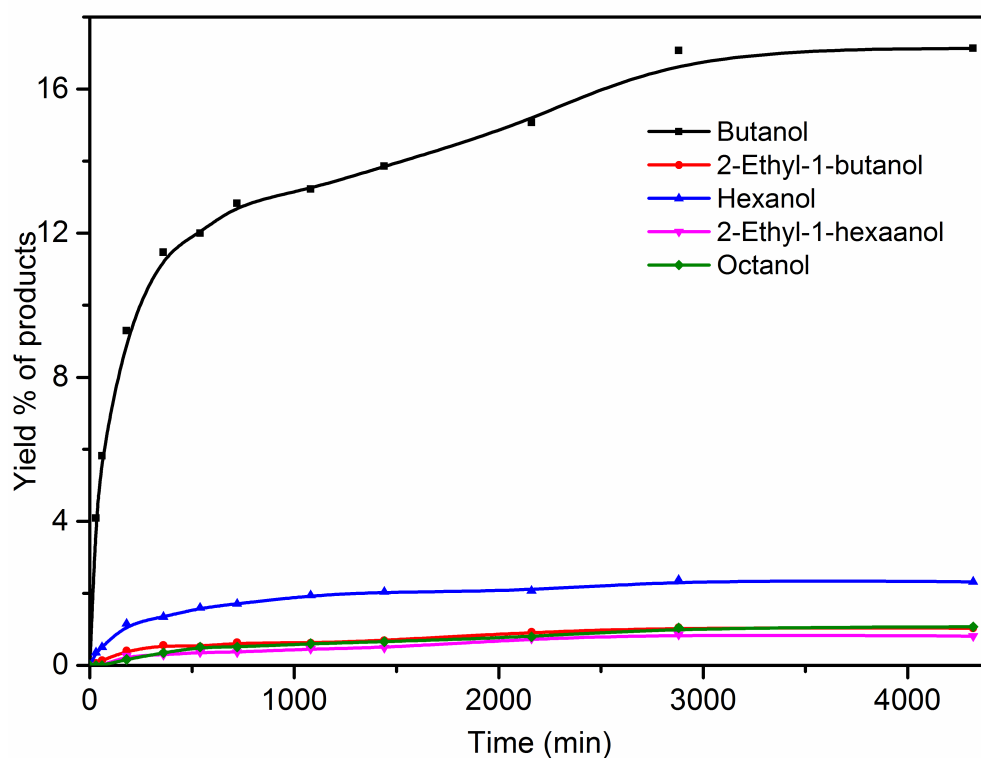

**Figure S58:** Ethanol upgradation to higher alcohol catalyzed by **1b**. Reaction condition: Temperature 140 °C; ethanol = 12.23 M; **1b** = 7.8 mM (Table 3, entry 2).

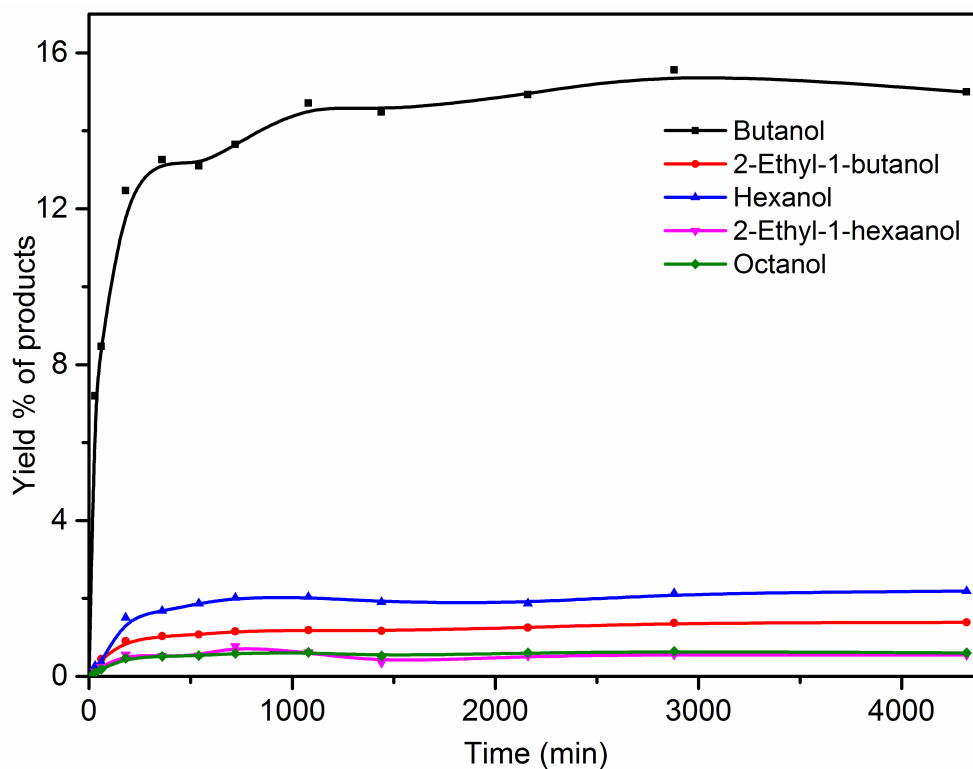

**Figure S59:** Ethanol upgradation to higher alcohol catalyzed by **1c**. Reaction condition: Temperature 140 °C; ethanol = 12.23 M; **1c** = 7.8 mM (Table 3, entry 3).

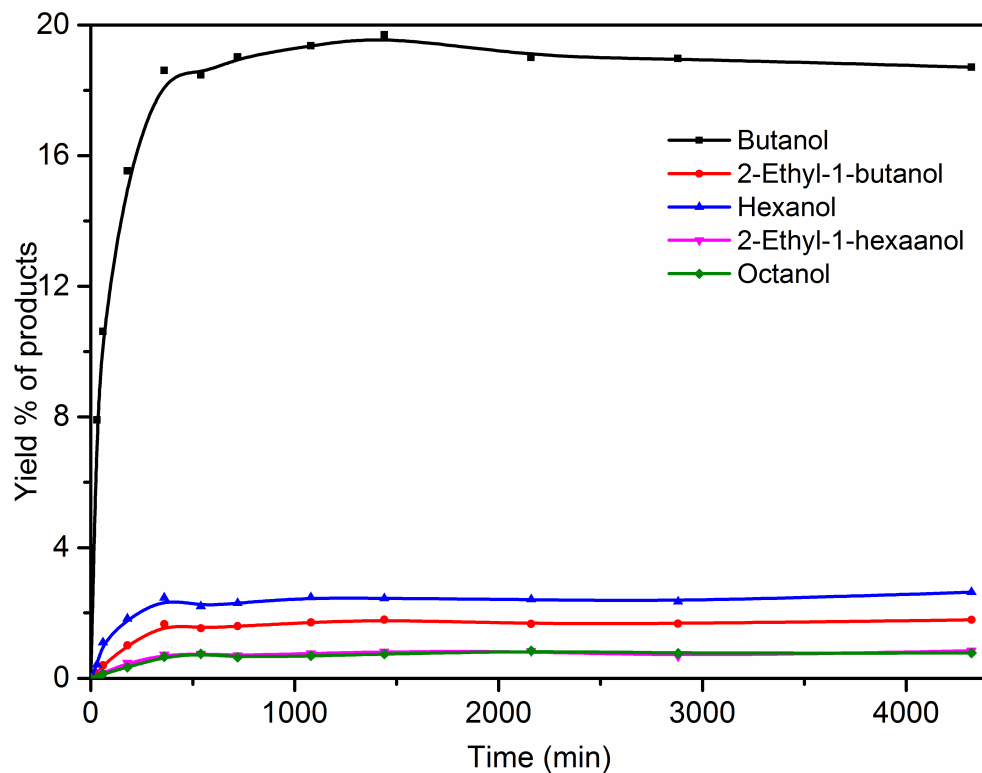

**Figure S60:** Ethanol upgradation to higher alcohol catalyzed by **1d**. Reaction condition: Temperature 140 °C; ethanol = 12.23 M; **1d** = 7.8 mM (Table 3, entry 4).

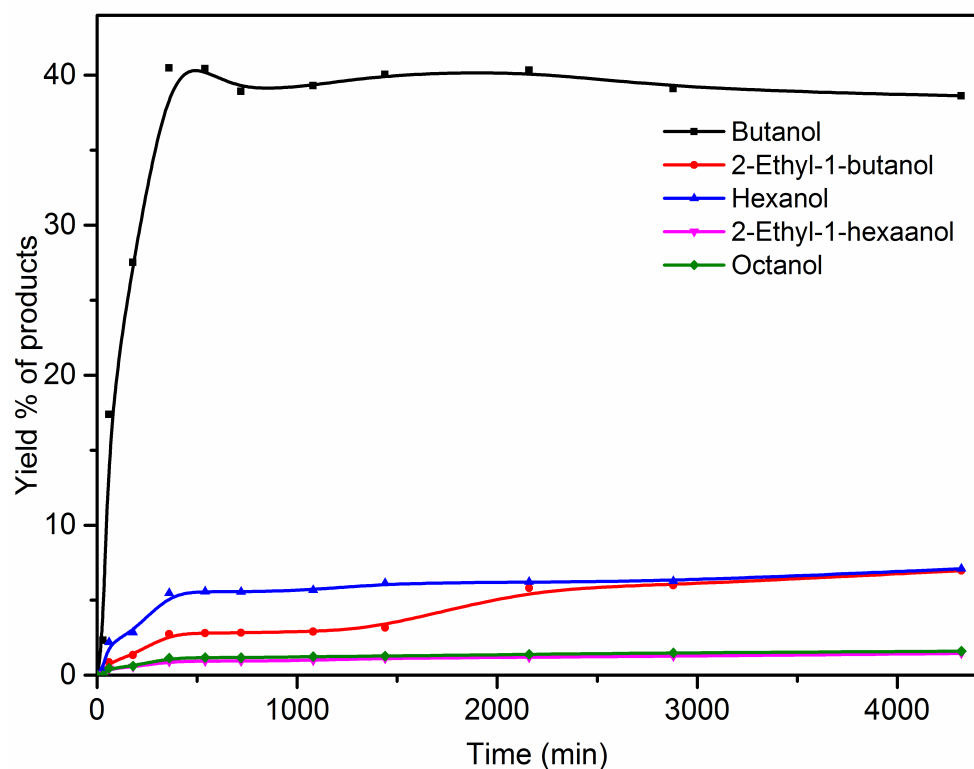

**Figure S61:** Ethanol upgradation to higher alcohol catalyzed by **1e**. Reaction condition: Temperature 140 °C; ethanol = 12.23 M; **1e** = 7.8 mM (Table 3, entry 5).

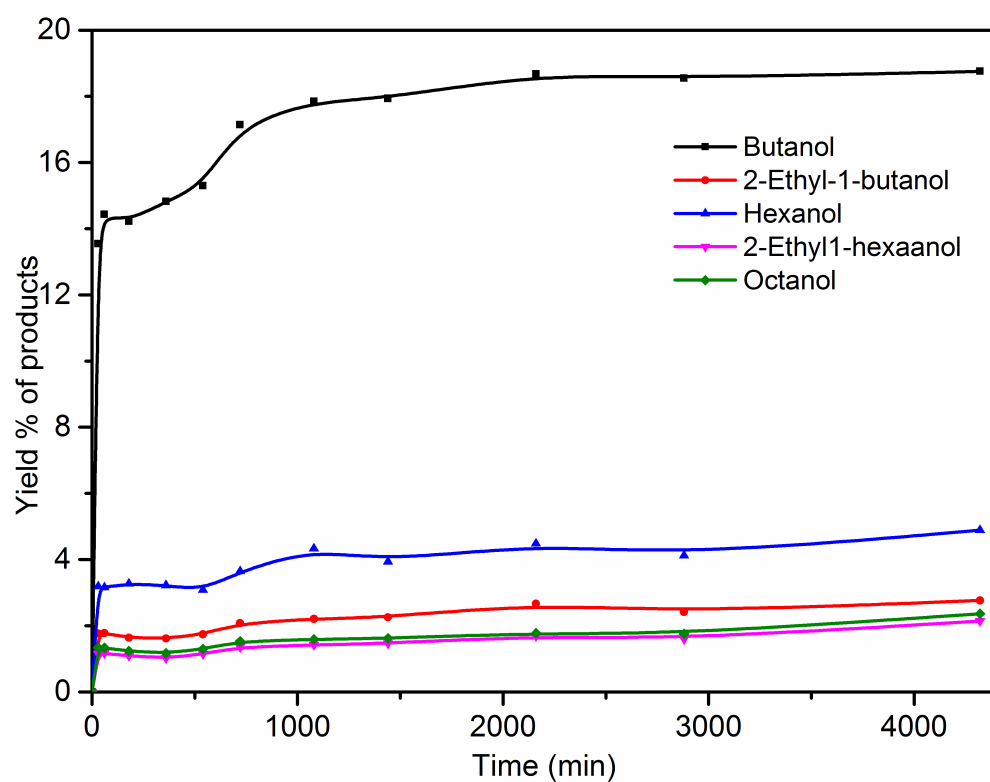

**Figure S62:** Ethanol upgradation to higher alcohol catalyzed by **1f**. Reaction condition: Temperature 140 °C; ethanol = 12.23 M **1f** = 7.8 mM (Table 3, entry 6).

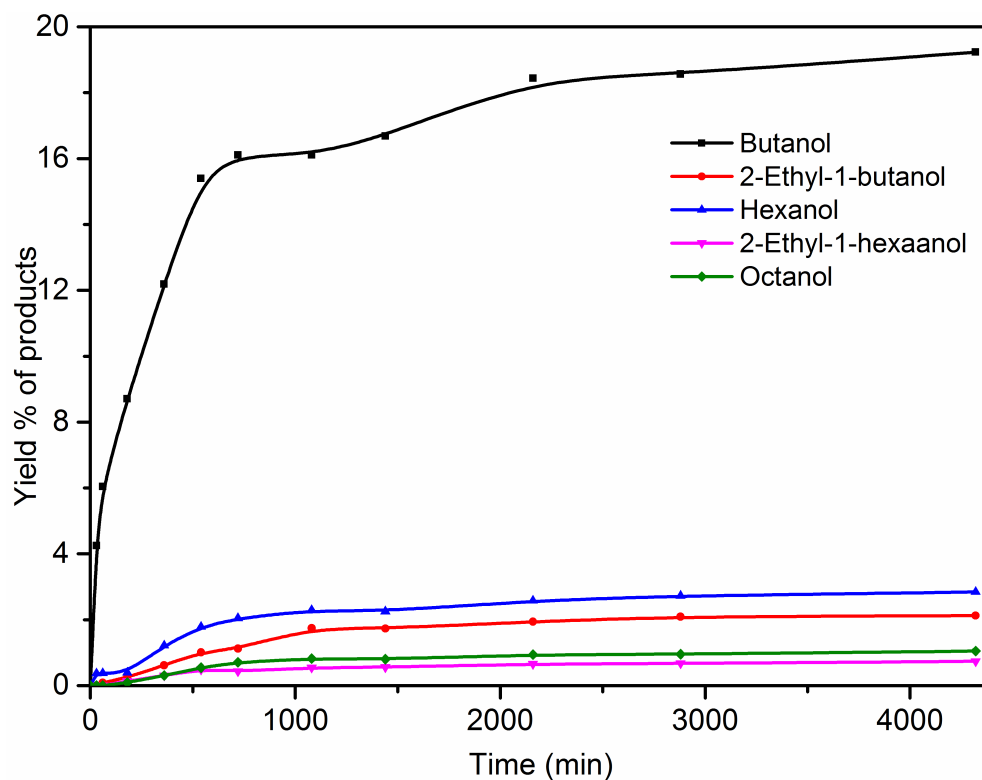

**Figure S63:** Ethanol upgradation to higher alcohol catalyzed by **2a**. Reaction condition: Temperature 140 °C; ethanol = 12.23 M; **2a** = 7.8 mM (Table 3, entry 7).

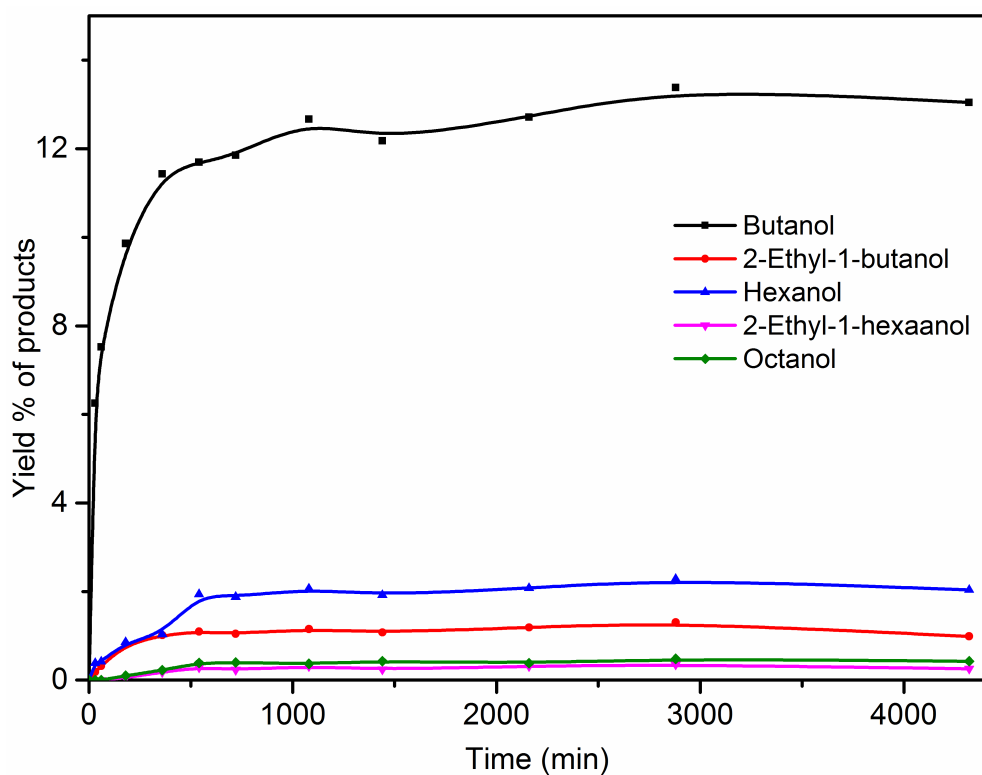

**Figure S64:** Ethanol upgradation to higher alcohol catalyzed by **2b**. Reaction condition: Temperature 140 °C; ethanol = 12.23 M; **2b** = 7.8 mM (Table 3, entry 8).



**Figure S65:** Ethanol upgradation to higher alcohol catalyzed by **2c**. Reaction condition: Temperature 140 °C; ethanol = 12.23 M; **2c** = 7.8 mM (Table 3, entry 9).

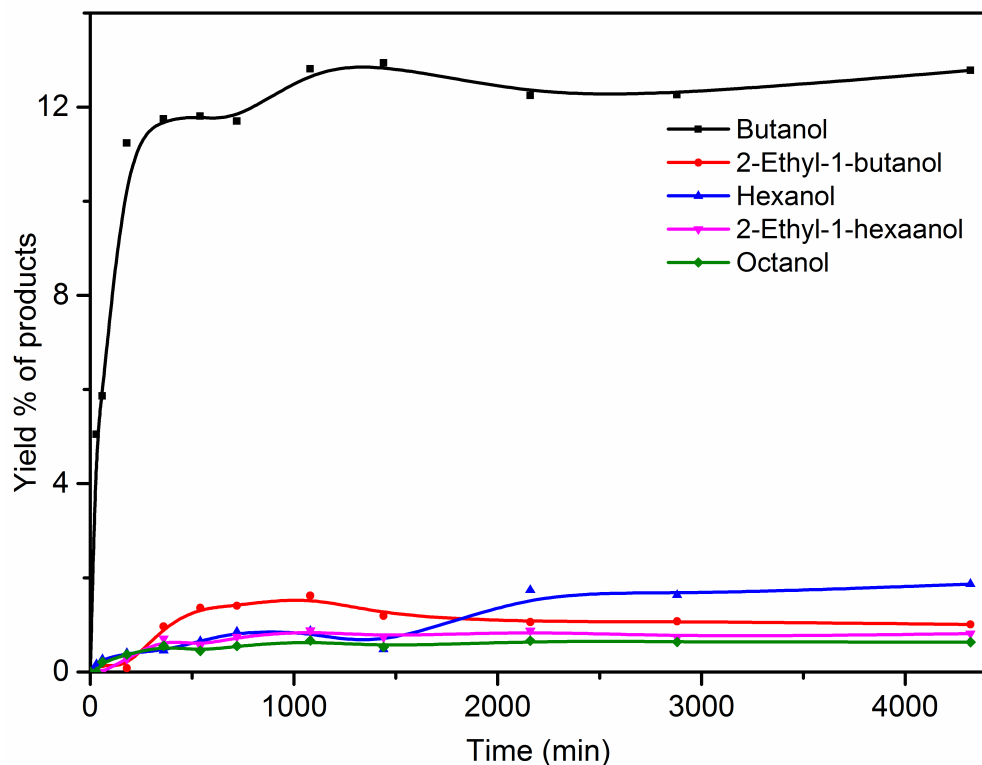

**Figure S66:** Ethanol upgradation to higher alcohol catalyzed by **2d**. Reaction condition: Temperature 140 °C; ethanol = 12.23 M; **2d** = 7.8 mM (Table 3, entry 10).



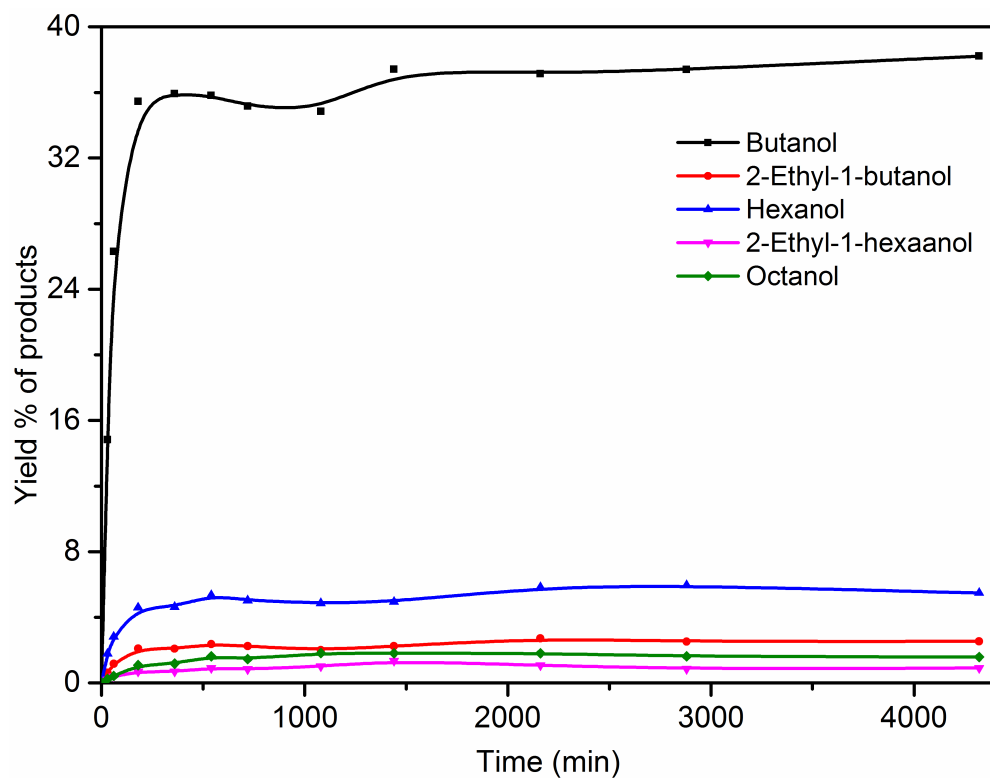

**Figure S67:** Ethanol upgradation to higher alcohol catalyzed by **2e**. Reaction condition: Temperature 140 °C; ethanol = 12.23 M; **2e** = 7.8 mM (Table 3, entry 11).

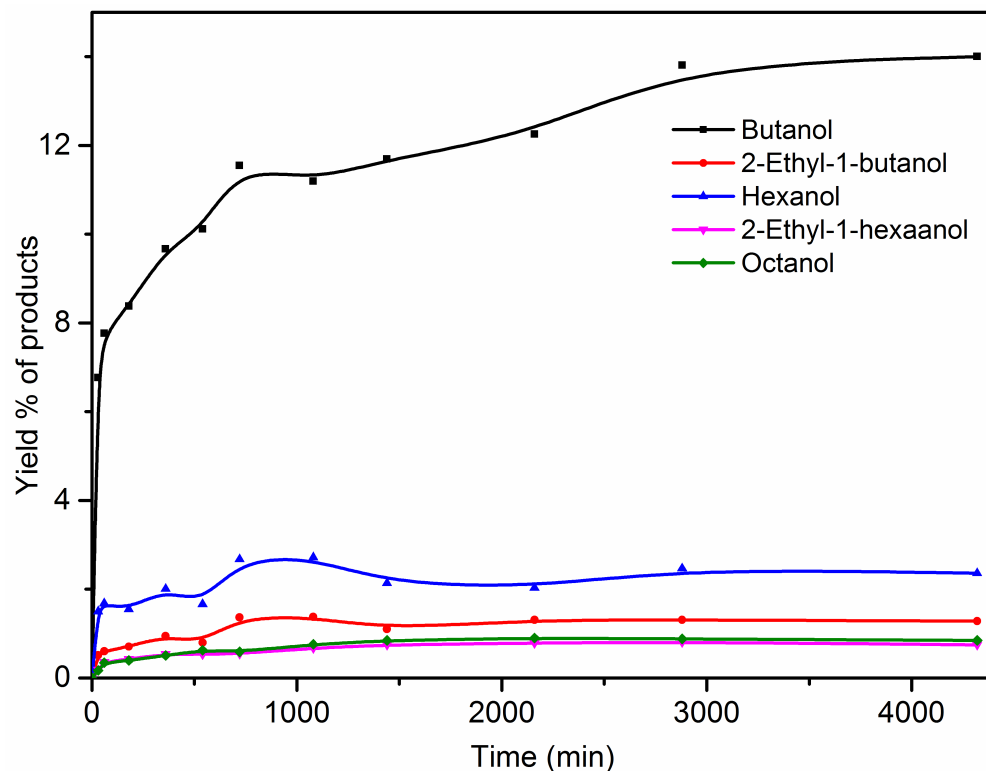

**Figure S68:** Ethanol upgradation to higher alcohol catalyzed by **2f**. Reaction condition: Temperature 140 °C; ethanol = 12.23 M; **2f** = 7.8 mM (Table 3, entry 12).

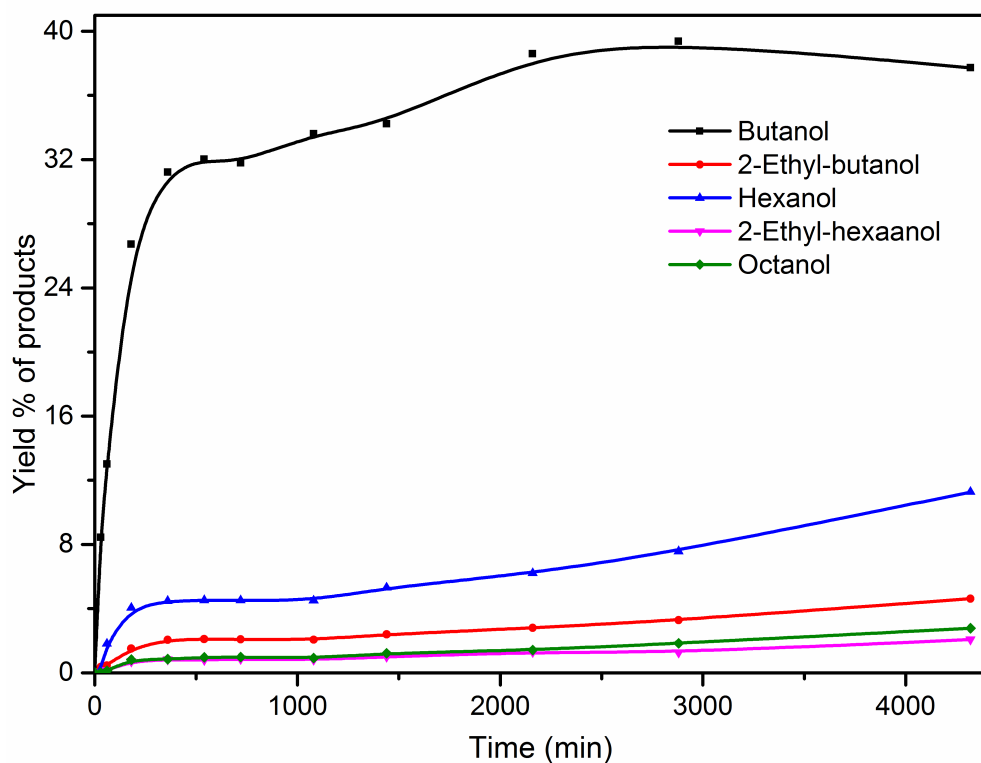

**Figure S69:** Ethanol upgradation to higher alcohol catalyzed by **2e**. Reaction condition: Temperature 140 °C; ethanol = 12.23 M; **2e** = 3.4 mM (Table 4, entry 1).

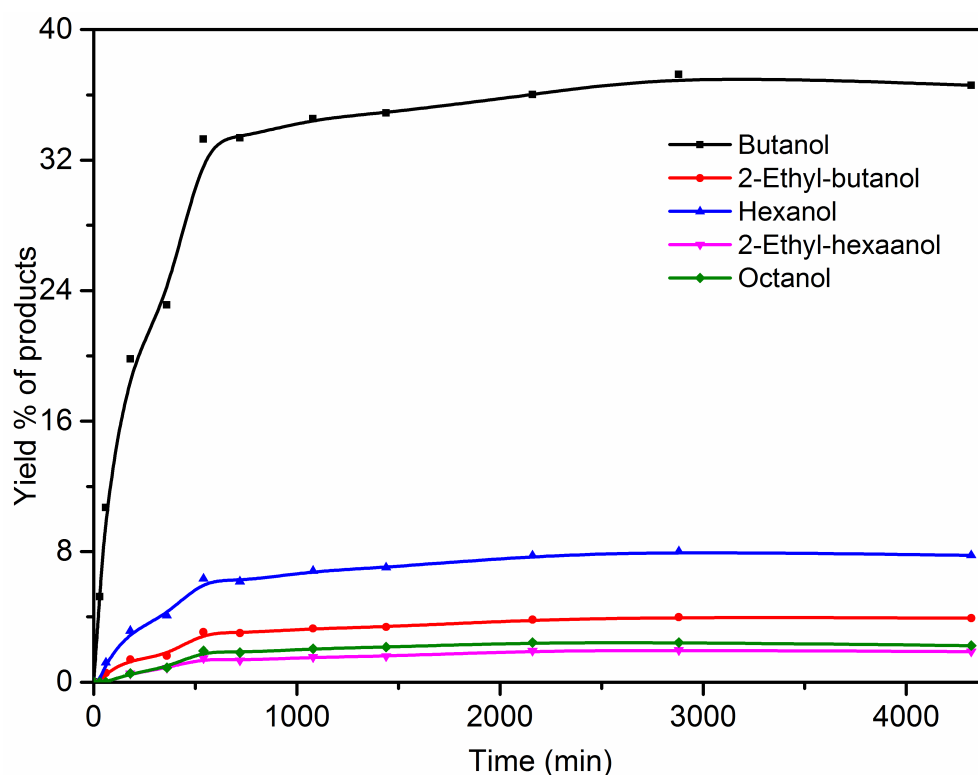

**Figure S70:** Ethanol upgradation to higher alcohol catalyzed by **2e**. Reaction condition: Temperature 140 °C; ethanol = 12.23 M; **2e** = 5.0 mM (Table 4, entry 2).

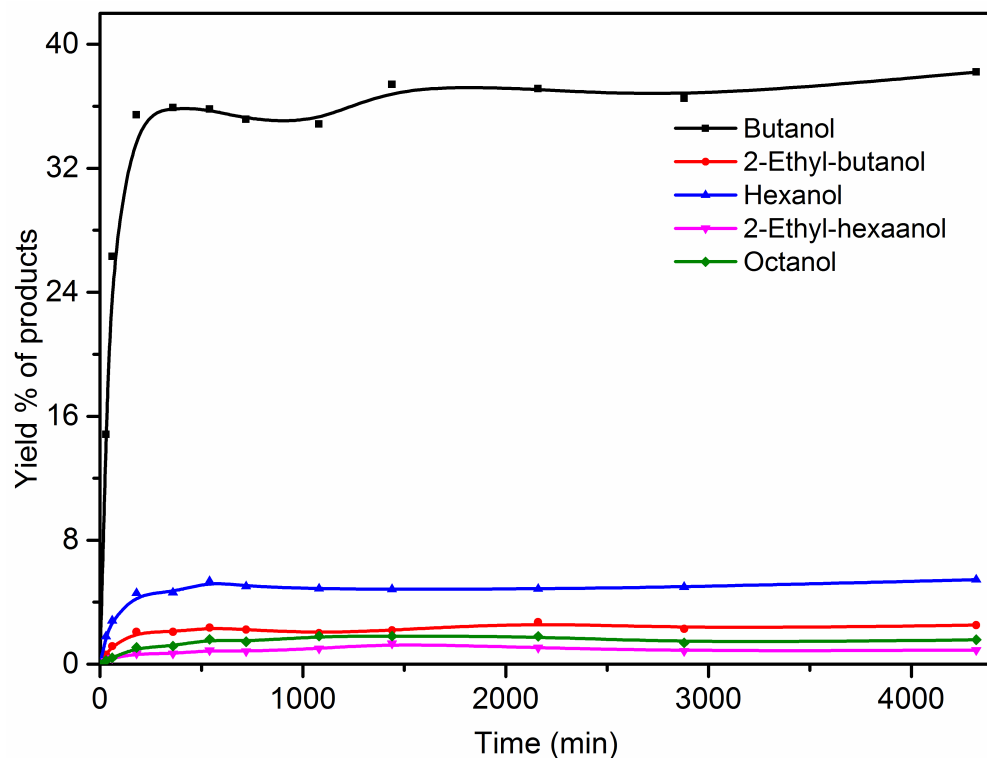

**Figure S71:** Ethanol upgradation to higher alcohol catalyzed by **2e**. Reaction condition: Temperature 140 °C; ethanol = 12.23 M; **2e** = 7.8 mM (Table 4, entry 3).

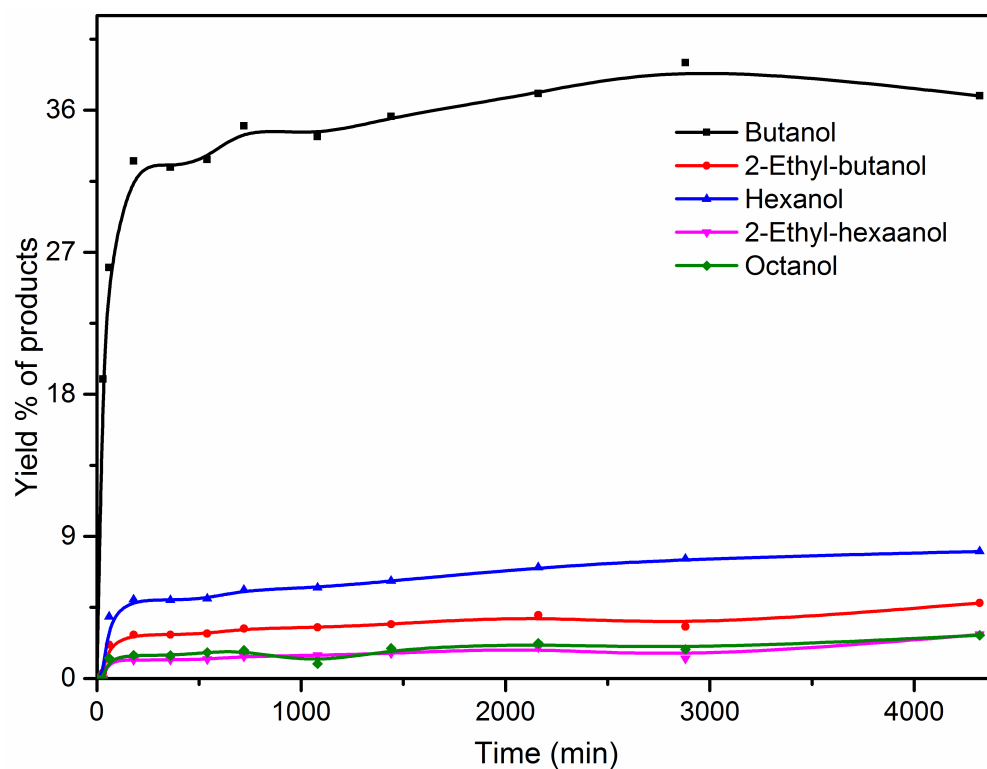

**Figure S72:** Ethanol upgradation to higher alcohol catalyzed by **2e**. Reaction condition: Temperature 140 °C; ethanol = 12.23 M; **2e** = 10.7 mM (Table 4, entry 4).

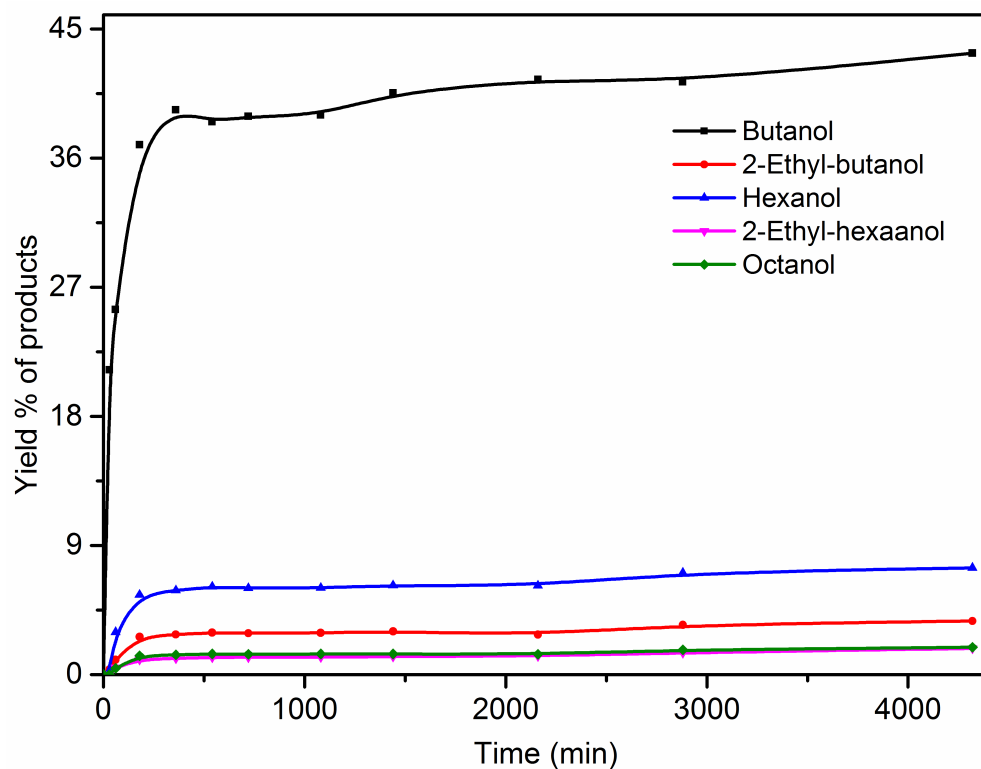

**Figure S73:** Ethanol upgradation to higher alcohol catalyzed by **2e**. Reaction condition: Temperature 140 °C; ethanol = 12.23 M; **2e** = 14.1 mM (Table 4, entry 5).

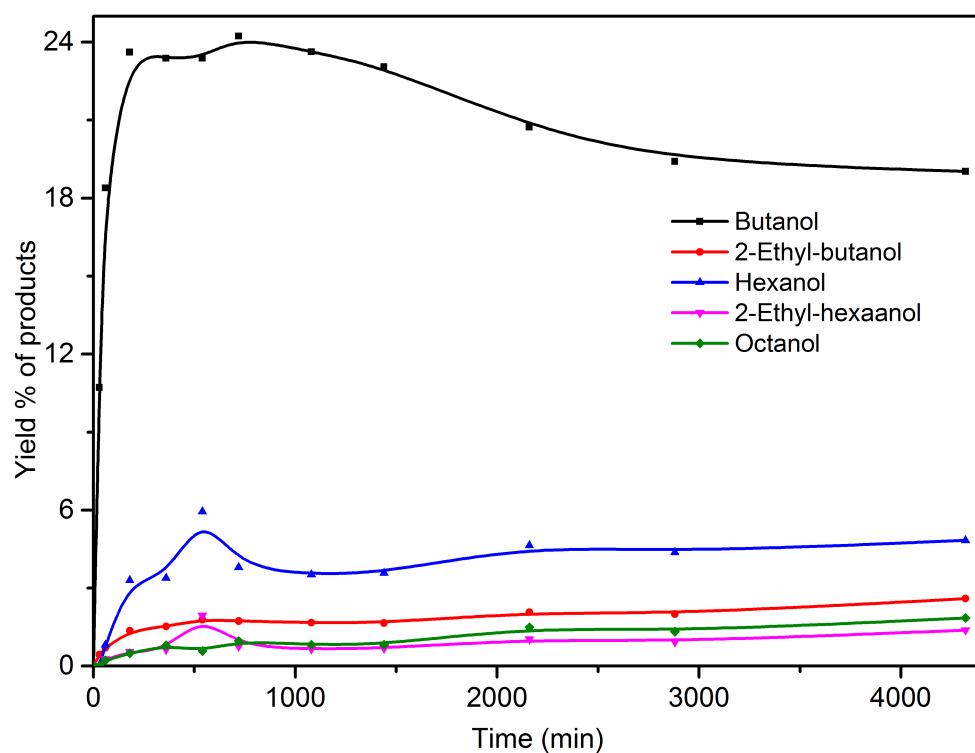

**Figure S74:** Ethanol upgradation to higher alcohol catalyzed by **2e**. Reaction condition: Temperature 140 °C; ethanol = 6.11 M; **2e** = 7.8 mM.

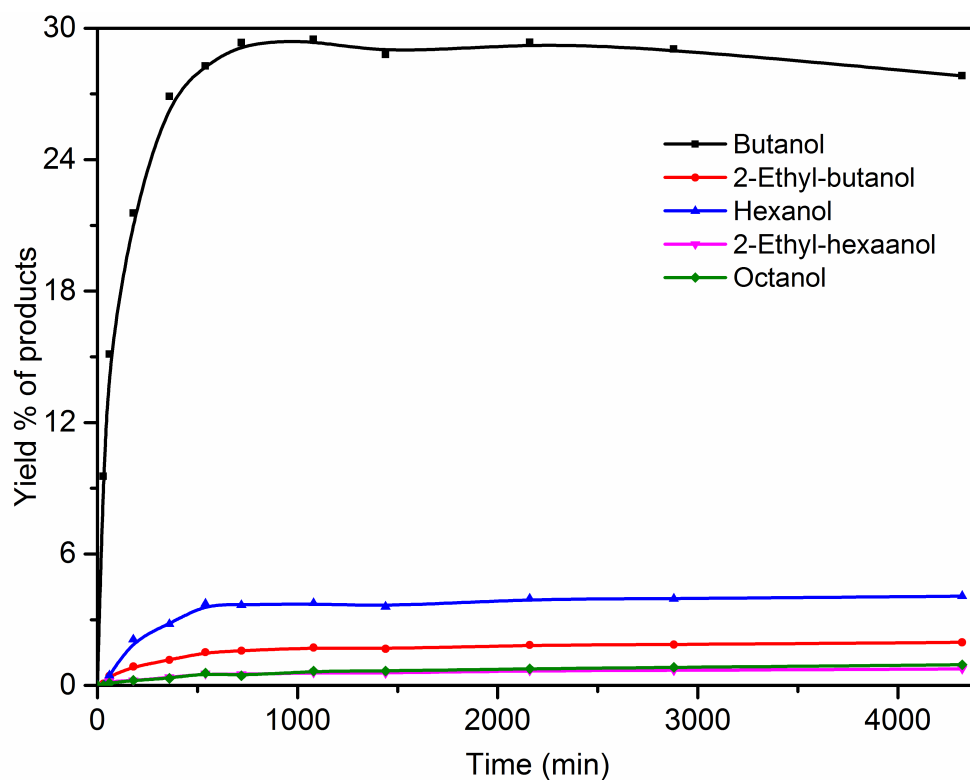

**Figure S75:** Ethanol upgradation to higher alcohol catalyzed by **2e**. Reaction condition: Temperature 140 °C; ethanol = 8.56 M; **2e** = 7.8 mM

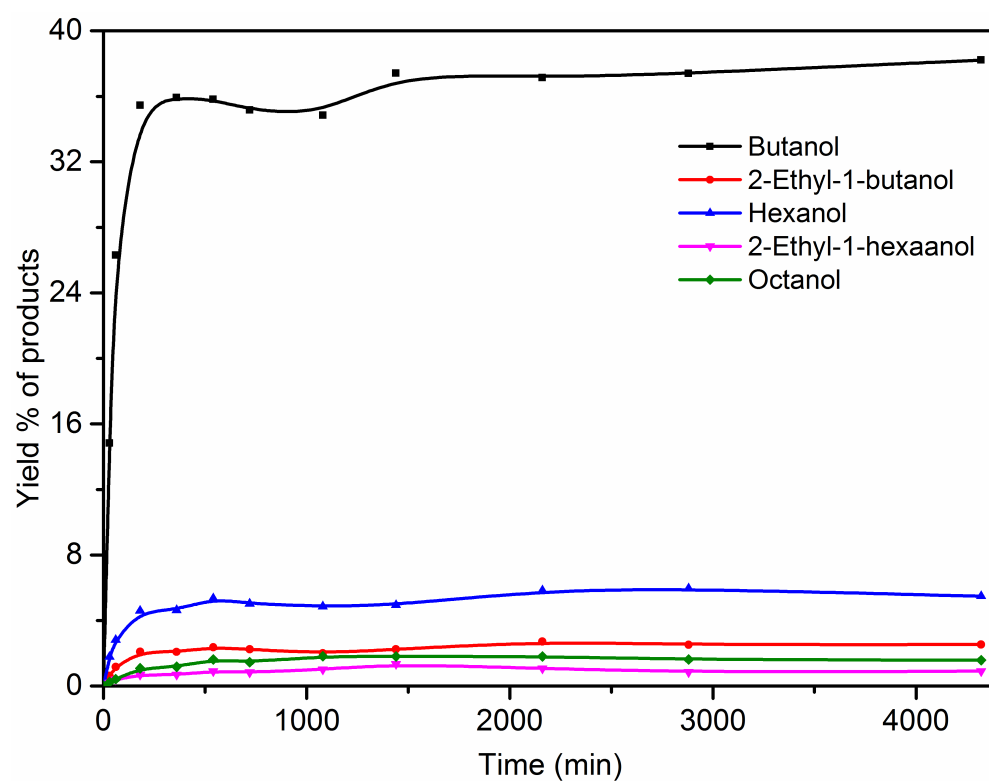

**Figure S76:** Ethanol upgradation to higher alcohol catalyzed by **2e**. Reaction condition: Temperature 140 °C; ethanol = 12.23 M; **2e** = 7.8 mM.

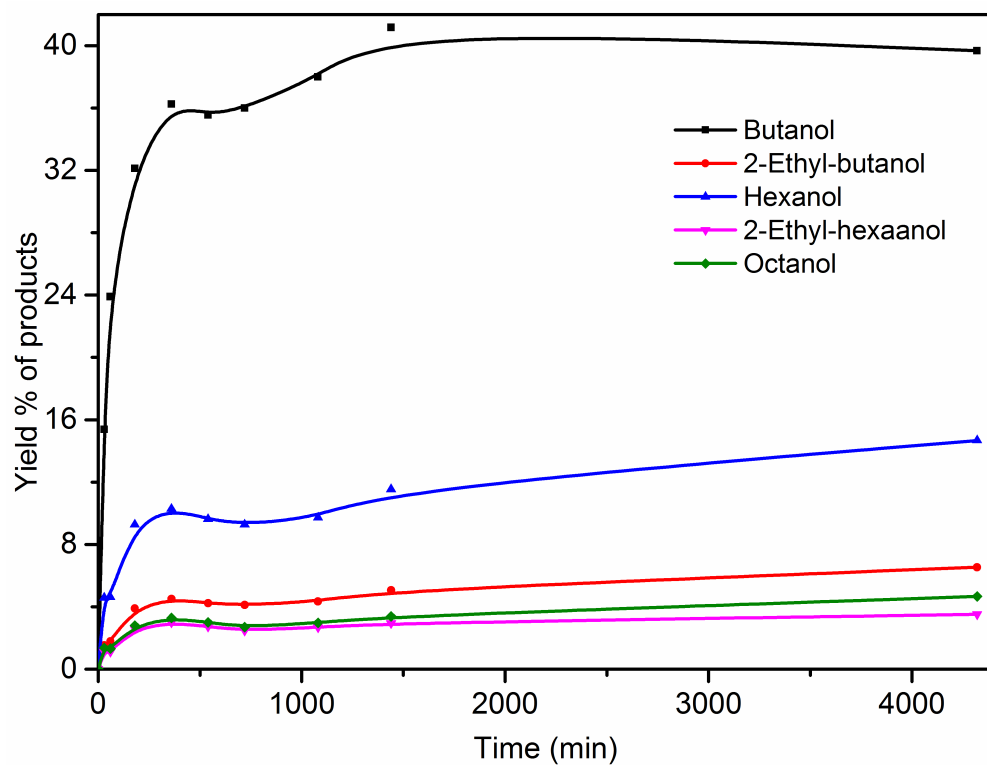

**Figure S77:** Ethanol upgradation to higher alcohol catalyzed by **2e**. Reaction condition: Temperature 140 °C; ethanol = 13.46 M; **2e** = 7.8 mM.

## 6. Computational study

Table S3a: Optimized XYZ coordinates for complex **8**

|   |             |             |             |    |             |             |             |
|---|-------------|-------------|-------------|----|-------------|-------------|-------------|
| C | -0.24056267 | 1.00167213  | -2.78071527 | H  | -0.62273141 | 5.03823395  | 0.85120840  |
| C | 0.01625185  | 0.78312355  | -4.13922126 | H  | 0.54966404  | 3.69926311  | 0.63397604  |
| C | 0.57345030  | -0.43308712 | -4.55744273 | C  | -2.65776044 | 3.95791229  | -0.74900853 |
| C | 0.87499244  | -1.42851886 | -3.61733585 | H  | -2.37235387 | 4.47112828  | -1.68070776 |
| C | 0.61516417  | -1.21164230 | -2.25977032 | H  | -3.46317839 | 3.24327337  | -0.97546659 |
| H | -0.22088786 | 1.56967002  | -4.85805112 | H  | -3.05933953 | 4.72383583  | -0.06852417 |
| H | 0.77469387  | -0.60474581 | -5.61560098 | N  | 0.50682374  | -1.61849826 | 0.04762996  |
| H | 1.31717313  | -2.37725696 | -3.92728824 | N  | 0.05405280  | -0.00158679 | -1.86420901 |
| C | 0.87416333  | -2.06702691 | -1.13851319 | N  | -0.97278274 | 2.07841680  | -0.82769406 |
| H | 1.38631299  | -3.02373941 | -1.26900375 | Ru | -0.32887485 | 0.26935147  | -0.03881637 |
| C | -0.79892631 | 2.15251265  | -2.13739237 | H  | -3.37235941 | 0.63098531  | -0.83093114 |
| H | -1.06316880 | 3.04489218  | -2.71206562 | C  | -3.32785023 | 0.24520821  | 0.20907138  |
| C | 0.77776422  | -2.37682276 | 1.28517593  | C  | -4.51557673 | -0.67222313 | 0.44227363  |
| H | 1.10317878  | -1.59942142 | 1.99911955  | C  | -5.73443331 | -0.15323906 | 0.90519389  |
| C | 1.89168937  | -3.42151873 | 1.17428043  | C  | -4.42380136 | -2.04503631 | 0.16670224  |
| H | 2.82146571  | -2.98286473 | 0.78164743  | C  | -6.84698073 | -0.98442045 | 1.07437646  |
| H | 2.10390230  | -3.82408231 | 2.17586250  | H  | -5.81188834 | 0.91317133  | 1.14055394  |
| H | 1.60083130  | -4.27394440 | 0.53869226  | C  | -5.53296434 | -2.87892788 | 0.34202489  |
| C | -0.54019447 | -2.98512462 | 1.79241290  | H  | -3.46678767 | -2.44608009 | -0.17305098 |
| H | -1.33884922 | -2.23074521 | 1.80730615  | C  | -6.74911187 | -2.35191359 | 0.79281171  |
| H | -0.85868026 | -3.80802923 | 1.13180018  | H  | -7.78897361 | -0.56568070 | 1.43752926  |
| H | -0.40049323 | -3.38993218 | 2.80635636  | H  | -5.44790382 | -3.94736006 | 0.12706889  |
| C | -1.46259134 | 3.26391182  | -0.08190456 | H  | -7.61450319 | -3.00447039 | 0.93134148  |
| H | -1.79623153 | 2.86119883  | 0.88868680  | O  | -2.11092005 | -0.44235073 | 0.41813625  |
| C | -0.29708535 | 4.23047861  | 0.17765609  | Cl | 1.71444971  | 1.19680295  | 0.79016465  |
| H | 0.04459319  | 4.68393357  | -0.76683355 | H  | -3.42431856 | 1.12614583  | 0.87822730  |

Table S3b: Optimized XYZ coordinates for complex **9**

|   |             |             |             |    |             |             |             |
|---|-------------|-------------|-------------|----|-------------|-------------|-------------|
| C | -1.25977606 | 0.51411895  | -2.48400249 | C  | -2.88798305 | 3.79998495  | -0.22780563 |
| C | -1.51711974 | 0.09500377  | -3.79327094 | H  | -2.88883493 | 4.22685073  | -1.24321916 |
| C | -1.07273508 | -1.16345421 | -4.22338505 | H  | -3.71171793 | 3.07420126  | -0.15333182 |
| C | -0.36887114 | -1.99672641 | -3.34436791 | H  | -3.08994712 | 4.62749187  | 0.46884847  |
| C | -0.11535852 | -1.57639086 | -2.03311265 | N  | 0.67050946  | -1.62782252 | 0.17522512  |
| H | -2.06375131 | 0.75875422  | -4.46546890 | N  | -0.57637559 | -0.33151005 | -1.62053123 |
| H | -1.27250308 | -1.49242418 | -5.24396992 | N  | -1.27791388 | 1.87841774  | -0.57282910 |
| H | -0.00670606 | -2.97496269 | -3.66644819 | Ru | -0.26600304 | 0.21547148  | 0.15676474  |
| C | 0.60596838  | -2.24513734 | -0.98996446 | H  | -2.96107092 | 1.21345094  | 1.53450824  |
| H | 1.10434450  | -3.20036202 | -1.17436960 | C  | -2.97014612 | 0.10280203  | 1.55258838  |
| C | -1.61659495 | 1.74500042  | -1.84249458 | C  | -3.91575527 | -0.36795930 | 0.45010952  |
| H | -2.14642827 | 2.52849736  | -2.39104520 | C  | -5.09279785 | 0.34725500  | 0.17297048  |
| C | 1.43462290  | -2.18542360 | 1.30863477  | C  | -3.64678904 | -1.53307394 | -0.28259217 |
| H | 1.92367243  | -1.30035409 | 1.75257230  | C  | -5.98181458 | -0.08923733 | -0.81486445 |
| C | 2.52412965  | -3.19055091 | 0.92445616  | H  | -5.31672650 | 1.25705018  | 0.74013649  |
| H | 3.20506423  | -2.77766283 | 0.16501015  | C  | -4.53267305 | -1.97027235 | -1.27426157 |
| H | 3.11889033  | -3.43119833 | 1.81820215  | H  | -2.72916933 | -2.08451369 | -0.06763573 |
| H | 2.10350095  | -4.13890094 | 0.55181993  | C  | -5.70228910 | -1.25112472 | -1.54463102 |
| C | 0.44368638  | -2.76258992 | 2.33280127  | H  | -6.89239031 | 0.48020459  | -1.01852305 |
| H | -0.36113192 | -2.04341090 | 2.53950889  | H  | -4.30644385 | -2.87741094 | -1.84077277 |
| H | -0.01303311 | -3.68621203 | 1.94117749  | H  | -6.39226622 | -1.59211192 | -2.32028265 |
| H | 0.96917731  | -3.00582065 | 3.26892522  | O  | -1.66644885 | -0.42209937 | 1.40246546  |
| C | -1.53942258 | 3.15964886  | 0.12796216  | Cl | 1.88249099  | 1.25661442  | -0.04351836 |
| H | -1.55664327 | 2.89000319  | 1.19746074  | C  | -3.47728483 | -0.34270454 | 2.93596680  |
| C | -0.36464031 | 4.12276113  | -0.10153522 | H  | -3.50928822 | -1.44148373 | 2.98314414  |
| H | -0.33327972 | 4.44274517  | -1.15551122 | H  | -2.79731159 | 0.02521717  | 3.71884647  |
| H | -0.48658388 | 5.01700706  | 0.52917681  | H  | -4.48901704 | 0.04632830  | 3.12843757  |
| H | 0.59068494  | 3.63640736  | 0.13859628  |    |             |             |             |



Table S3c: Optimized XYZ coordinates for complex **10**

|   |             |             |             |    |             |             |             |
|---|-------------|-------------|-------------|----|-------------|-------------|-------------|
| C | 2.89535630  | 0.53699707  | -0.89435594 | H  | 1.72546685  | 5.09802960  | 1.75109234  |
| C | 4.09769406  | 0.08685429  | -1.45370772 | H  | 2.61172479  | 3.58111828  | 2.05300705  |
| C | 4.20989602  | -1.27782435 | -1.77780119 | C  | 0.37678111  | 4.21725005  | -0.57628339 |
| C | 3.15700940  | -2.16210198 | -1.53262049 | H  | 1.15810606  | 4.52370769  | -1.29085106 |
| C | 1.96493399  | -1.66080820 | -0.96872750 | H  | -0.34932101 | 3.59728563  | -1.12019628 |
| H | 4.92598631  | 0.77668192  | -1.62242433 | H  | -0.12184132 | 5.12269126  | -0.19859582 |
| H | 5.13807509  | -1.65264739 | -2.21361887 | N  | -0.22341826 | -1.66807849 | -0.04037455 |
| H | 3.25259048  | -3.22515758 | -1.76010686 | N  | 1.87224712  | -0.33049561 | -0.69973223 |
| C | 0.76847160  | -2.36733933 | -0.57885508 | N  | 1.37963983  | 2.08762510  | 0.08836944  |
| H | 0.70025840  | -3.45170265 | -0.69657646 | Ru | 0.17695442  | 0.32472310  | 0.16194754  |
| C | 2.56209401  | 1.87907147  | -0.42032423 | H  | -1.88308057 | 2.24925424  | -0.08218835 |
| H | 3.31717632  | 2.67219888  | -0.47338574 | C  | -1.72781197 | 1.24078855  | -0.51930511 |
| C | -1.39430896 | -2.41304892 | 0.50091387  | C  | -2.98969853 | 0.43069041  | -0.56464403 |
| H | -2.21123490 | -1.67962536 | 0.50262148  | C  | -3.94221470 | 0.52289634  | 0.46449497  |
| C | -1.10034418 | -2.81192297 | 1.95471864  | C  | -3.26530199 | -0.36762120 | -1.68618376 |
| H | -0.75075836 | -1.94541727 | 2.53298869  | C  | -5.14056031 | -0.19041170 | 0.38561349  |
| H | -2.01446079 | -3.21480075 | 2.41769462  | H  | -3.73081136 | 1.14665935  | 1.33864743  |
| H | -0.31751788 | -3.58654003 | 1.99480763  | C  | -4.46705532 | -1.07868613 | -1.76654702 |
| C | -1.83076394 | -3.60873847 | -0.35411399 | H  | -2.52274962 | -0.40591775 | -2.48636833 |
| H | -1.95403571 | -3.32323420 | -1.40943188 | C  | -5.40547266 | -0.99637949 | -0.73059025 |
| H | -1.12746672 | -4.45472260 | -0.29215236 | H  | -5.87210361 | -0.11833632 | 1.19419021  |
| H | -2.80287000 | -3.96952928 | 0.01384283  | H  | -4.67702133 | -1.69396553 | -2.64526493 |
| C | 1.00323542  | 3.42991211  | 0.58774448  | H  | -6.34491968 | -1.55059079 | -0.79498290 |
| H | 0.22541511  | 3.22115617  | 1.33871785  | O  | -0.86727353 | 1.13958364  | -1.51002350 |
| C | 2.13850034  | 4.19653766  | 1.27384468  | Cl | 1.23385957  | -0.03277054 | 2.32419525  |
| H | 2.91005766  | 4.53387973  | 0.56313594  | H  | -1.11777408 | 0.72001633  | 1.10250569  |

Table S3d: Optimized XYZ coordinates for complex **11**

|   |             |             |             |    |             |             |             |
|---|-------------|-------------|-------------|----|-------------|-------------|-------------|
| C | 3.17046176  | -0.31616040 | -0.80003377 | C  | 2.07243881  | 3.90359391  | -0.96194734 |
| C | 4.24825884  | -1.06951036 | -1.28480419 | H  | 3.10216151  | 3.84574343  | -1.34978725 |
| C | 4.09890811  | -2.45485493 | -1.43870732 | H  | 1.38232914  | 3.59796261  | -1.76136575 |
| C | 2.88836557  | -3.07507760 | -1.10474455 | H  | 1.87004683  | 4.95453598  | -0.70429801 |
| C | 1.82578255  | -2.29484967 | -0.62462355 | N  | -0.32739872 | -1.78501415 | 0.20477519  |
| H | 5.18922633  | -0.57372148 | -1.52953324 | N  | 1.98190789  | -0.93589893 | -0.49880423 |
| H | 4.93138495  | -3.05311626 | -1.81257618 | N  | 1.96222006  | 1.57681272  | -0.07959470 |
| H | 2.76289803  | -4.15455004 | -1.20583069 | Ru | 0.49864787  | 0.12755317  | 0.17580127  |
| C | 0.51133284  | -2.71440395 | -0.21166178 | C  | -1.54596055 | 1.48171014  | -0.76984896 |
| H | 0.23174819  | -3.77115210 | -0.24253501 | C  | -2.88723552 | 0.76590503  | -0.64046665 |
| C | 3.10166824  | 1.09903003  | -0.53314226 | C  | -3.75103803 | 0.97675170  | 0.44793570  |
| H | 3.97617392  | 1.73959759  | -0.68934525 | C  | -3.29292140 | -0.08328890 | -1.68034759 |
| C | -1.65817408 | -2.19831232 | 0.71968694  | C  | -4.99359076 | 0.33943150  | 0.50021220  |
| H | -2.31072551 | -1.33821818 | 0.51730186  | H  | -3.43580600 | 1.62414817  | 1.27161782  |
| C | -1.57204994 | -2.38676105 | 2.24192947  | C  | -4.54196813 | -0.71359897 | -1.63355491 |
| H | -1.12172481 | -1.50665890 | 2.72029349  | H  | -2.60479379 | -0.23499176 | -2.51478603 |
| H | -2.58228504 | -2.54550003 | 2.64970141  | C  | -5.39449784 | -0.50690847 | -0.54329436 |
| H | -0.95243563 | -3.26399012 | 2.48936112  | H  | -5.65198554 | 0.50047291  | 1.35752863  |
| C | -2.25864870 | -3.42361951 | 0.02050585  | H  | -4.85097311 | -1.36834387 | -2.45258382 |
| H | -2.24061335 | -3.31126999 | -1.07410295 | H  | -6.36844293 | -1.00079272 | -0.50459145 |
| H | -1.74750866 | -4.36136242 | 0.29275796  | O  | -0.72386327 | 1.02637195  | -1.68365868 |
| H | -3.30896277 | -3.52584617 | 0.33098560  | Cl | 1.13394870  | -0.00927663 | 2.46854035  |
| C | 1.88904865  | 3.01690511  | 0.27658319  | H  | -0.99365641 | 1.18336817  | 0.65578316  |
| H | 0.86698145  | 3.15123187  | 0.65627216  | C  | -1.66060529 | 3.02679071  | -0.66052659 |
| C | 2.86082877  | 3.35512571  | 1.41546575  | H  | -2.71269951 | 3.34378476  | -0.62272584 |
| H | 3.91029974  | 3.28620581  | 1.08691348  | H  | -1.15080831 | 3.43859647  | 0.21955335  |
| H | 2.68359708  | 4.38542534  | 1.76070208  | H  | -1.19565928 | 3.44852142  | -1.56246151 |
| H | 2.70940257  | 2.66696084  | 2.25923728  |    |             |             |             |

Table S3e: Optimized XYZ coordinates for complex **12** and **4'**

|   |             |             |             |    |             |             |             |
|---|-------------|-------------|-------------|----|-------------|-------------|-------------|
| C | 0.75973480  | -1.29977012 | 2.38358141  | H  | 0.20954201  | -3.93618989 | -2.41216257 |
| C | 0.98458361  | -1.50009694 | 3.75248746  | H  | 1.34371358  | -2.64685306 | -1.93902717 |
| C | 1.66484966  | -0.51900025 | 4.48791531  | C  | -1.66038863 | -3.55602711 | -0.37962122 |
| C | 2.11044018  | 0.65354135  | 3.86175527  | H  | -1.27842962 | -4.35808313 | 0.27308935  |
| C | 1.87091946  | 0.83348674  | 2.49218715  | H  | -2.45220135 | -2.99884956 | 0.14413828  |
| H | 0.62596470  | -2.41293551 | 4.23156791  | H  | -2.11702489 | -4.04546143 | -1.25325620 |
| H | 1.84355432  | -0.66657777 | 5.55420770  | N  | 1.85620552  | 1.88147153  | 0.37611637  |
| H | 2.63351188  | 1.42758572  | 4.42642077  | N  | 1.20804918  | -0.14339515 | 1.77894114  |
| C | 2.21612077  | 1.95079808  | 1.64665306  | N  | 0.02016953  | -1.73598407 | 0.18437915  |
| H | 2.74896575  | 2.81483193  | 2.05332035  | Ru | 0.84048363  | 0.14136796  | -0.09908167 |
| C | 0.10352073  | -2.16387150 | 1.43231044  | H  | -0.49993787 | 0.81396243  | 0.35311184  |
| H | -0.29502410 | -3.13484380 | 1.73907729  | C  | -3.41378367 | -0.11536267 | -0.61352265 |
| C | 2.20587607  | 2.97261324  | -0.56556769 | C  | -4.04884609 | 1.04418674  | -1.27944756 |
| H | 1.32580791  | 3.04656390  | -1.22522634 | C  | -3.25541631 | 1.90116635  | -2.06359034 |
| C | 3.39075000  | 2.51218806  | -1.42944276 | C  | -5.42834077 | 1.28619777  | -1.14022096 |
| H | 3.15041035  | 1.56714664  | -1.93537307 | C  | -3.84213210 | 2.99582885  | -2.70532304 |
| H | 3.60723400  | 3.26837942  | -2.19933191 | H  | -2.18528169 | 1.69392320  | -2.17078196 |
| H | 4.29232379  | 2.37621955  | -0.81012452 | C  | -6.00748519 | 2.38099511  | -1.77830078 |
| C | 2.46317128  | 4.33545346  | 0.08331495  | H  | -6.01599969 | 0.59904032  | -0.52665768 |
| H | 1.63826798  | 4.63160581  | 0.74966829  | C  | -5.21410365 | 3.23567411  | -2.56102242 |
| H | 3.40534497  | 4.35862471  | 0.65500170  | H  | -3.23134825 | 3.66074368  | -3.32021117 |
| H | 2.54752493  | 5.09644794  | -0.70668321 | H  | -7.07744907 | 2.57575902  | -1.67280561 |
| C | -0.55422330 | -2.61594065 | -0.86629568 | H  | -5.67188844 | 4.09227697  | -3.06231457 |
| H | -0.97776392 | -1.91444922 | -1.60258243 | O  | -4.00996436 | -0.95074173 | 0.05570586  |
| C | 0.59820076  | -3.35985782 | -1.55896926 | Cl | 0.47609921  | 0.42947800  | -2.45395428 |
| H | 1.08889830  | -4.05753149 | -0.86075622 | H  | -2.30721907 | -0.17874394 | -0.76598056 |

Table S3f: Optimized XYZ coordinates for complex **12** and **5'**

|   |             |             |             |    |             |             |             |
|---|-------------|-------------|-------------|----|-------------|-------------|-------------|
| C | 3.18525192  | 0.31715218  | 2.62760162  | C  | -0.79941540 | 1.90219024  | 2.91283281  |
| C | 4.25629097  | 0.43767661  | 3.52345396  | H  | -0.67257096 | 1.58521434  | 3.96115029  |
| C | 5.53398507  | 0.01619822  | 3.12826404  | H  | -0.18992202 | 2.80217654  | 2.73669012  |
| C | 5.73802136  | -0.51915269 | 1.84878430  | H  | -1.85697060 | 2.17233578  | 2.77543268  |
| C | 4.65183283  | -0.63020430 | 0.96949837  | N  | 3.45505071  | -1.13533008 | -1.00152963 |
| H | 4.08616058  | 0.85923852  | 4.51587057  | N  | 3.39859111  | -0.21588254 | 1.37273547  |
| H | 6.37362607  | 0.10700265  | 3.81925724  | N  | 0.98104197  | 0.46017164  | 1.79592714  |
| H | 6.72875045  | -0.84734782 | 1.52883765  | Ru | 1.91236066  | -0.37474214 | 0.14654880  |
| C | 4.62281024  | -1.13685707 | -0.38074986 | H  | 2.24703975  | 1.06445050  | -0.37305335 |
| H | 5.53636184  | -1.49730302 | -0.86193449 | C  | -3.44206682 | 1.58186040  | -0.06365739 |
| C | 1.80158618  | 0.68545865  | 2.80665455  | C  | -2.76234819 | 2.75009778  | -0.71947922 |
| H | 1.45760497  | 1.13817233  | 3.74080096  | C  | -1.95978009 | 2.60876139  | -1.86702716 |
| C | 3.34067039  | -1.66617877 | -2.38233660 | C  | -2.91807081 | 4.02410119  | -0.14050639 |
| H | 2.56750408  | -1.03331147 | -2.84688198 | C  | -1.32459294 | 3.72466894  | -2.42106939 |
| C | 2.78574231  | -3.09775864 | -2.31444377 | H  | -1.79715096 | 1.62295644  | -2.30737879 |
| H | 1.83300675  | -3.11252172 | -1.76789944 | C  | -2.29919189 | 5.13826675  | -0.70613537 |
| H | 2.60408446  | -3.47590268 | -3.33204145 | H  | -3.53855916 | 4.10901129  | 0.75439333  |
| H | 3.50367363  | -3.76908005 | -1.81553818 | C  | -1.49881969 | 4.98947663  | -1.84793646 |
| C | 4.62377722  | -1.58497415 | -3.21469086 | H  | -0.68790467 | 3.60411506  | -3.30043238 |
| H | 5.05434081  | -0.57185587 | -3.19834680 | H  | -2.43601399 | 6.12591445  | -0.25902394 |
| H | 5.39162628  | -2.30067300 | -2.87837777 | H  | -1.00797345 | 5.86083089  | -2.28856605 |
| H | 4.38784004  | -1.83466121 | -4.25989819 | O  | -3.86357217 | 1.67568302  | 1.08959383  |
| C | -0.46069935 | 0.78931641  | 1.91843380  | Cl | 0.05100582  | -0.80497966 | -1.31558664 |
| H | -0.73896512 | 1.12349235  | 0.90639046  | C  | -3.57808579 | 0.29369635  | -0.84552717 |
| C | -1.23792624 | -0.50233308 | 2.21904440  | H  | -3.98820098 | 0.47320741  | -1.85148214 |
| H | -0.96391325 | -0.89400781 | 3.21241837  | H  | -2.58550582 | -0.17482975 | -0.97782858 |
| H | -2.31665061 | -0.28646289 | 2.21049828  | H  | -4.22914105 | -0.39251865 | -0.29060954 |
| H | -1.02472918 | -1.26748463 | 1.45942859  |    |             |             |             |

Table S3g: Optimized XYZ coordinates for complex **13**

|   |             |             |             |    |             |             |             |
|---|-------------|-------------|-------------|----|-------------|-------------|-------------|
| C | 1.95622672  | -0.94205915 | 1.89701953  | H  | 3.35294692  | -3.69957484 | -0.86031903 |
| C | 2.47396195  | -0.86824204 | 3.19763961  | C  | -0.12622752 | -3.53336193 | -1.25507969 |
| C | 2.50180390  | 0.37149278  | 3.85205909  | H  | -0.37402936 | -4.09013080 | -0.33661602 |
| C | 2.03150234  | 1.52389656  | 3.20763995  | H  | -0.85485895 | -2.71975580 | -1.36761886 |
| C | 1.51758246  | 1.41686441  | 1.90705699  | H  | -0.21821359 | -4.21863315 | -2.11125284 |
| H | 2.85981212  | -1.76728552 | 3.68144207  | N  | 0.55546749  | 2.10441755  | -0.14303746 |
| H | 2.90468754  | 0.44182490  | 4.86374570  | N  | 1.46754650  | 0.19011590  | 1.29572355  |
| H | 2.07019421  | 2.49773227  | 3.69902450  | N  | 1.35293889  | -1.89397953 | -0.17833944 |
| C | 0.99231843  | 2.45528101  | 1.05154475  | Ru | 0.78841309  | 0.06875453  | -0.52971924 |
| H | 0.95464105  | 3.49071963  | 1.40064562  | H  | -2.08592295 | 1.02391250  | 0.75900182  |
| C | 1.88368584  | -2.08206682 | 1.01079442  | C  | -2.32181622 | 0.48609508  | -0.18060202 |
| H | 2.28897616  | -3.05042732 | 1.31758756  | C  | -3.70176854 | -0.13634937 | -0.06857552 |
| C | 0.04243344  | 3.13396020  | -1.07933059 | C  | -4.84515475 | 0.66020814  | -0.24235619 |
| H | -0.85830857 | 2.67425536  | -1.52048514 | C  | -3.86133833 | -1.49510015 | 0.23893756  |
| C | 1.06157571  | 3.33269048  | -2.21080854 | C  | -6.12407892 | 0.11335871  | -0.10101502 |
| H | 1.33796428  | 2.37023193  | -2.66076852 | H  | -4.73304752 | 1.71961493  | -0.49497378 |
| H | 0.63099513  | 3.98839281  | -2.98320884 | C  | -5.14135168 | -2.04480798 | 0.37427156  |
| H | 1.98111965  | 3.79754333  | -1.82320886 | H  | -2.96976047 | -2.11255761 | 0.36206479  |
| C | -0.36381745 | 4.46318377  | -0.43538752 | C  | -6.27626678 | -1.24384342 | 0.20786006  |
| H | -1.06845914 | 4.32084766  | 0.39908250  | H  | -7.00443122 | 0.74549764  | -0.24180837 |
| H | 0.50663866  | 5.03232873  | -0.07131252 | H  | -5.25251171 | -3.10620626 | 0.61066530  |
| H | -0.86125665 | 5.08655758  | -1.19303306 | H  | -7.27490313 | -1.67458222 | 0.31245331  |
| C | 1.30810129  | -2.98740833 | -1.17477148 | O  | -1.32756141 | -0.50118343 | -0.42373339 |
| H | 1.54329453  | -2.47505035 | -2.12281011 | Cl | 2.97010892  | 0.41851499  | -1.45255810 |
| C | 2.33423539  | -4.10341714 | -0.95920758 | H  | 0.03646008  | -0.05925451 | -2.16349197 |
| H | 2.10458318  | -4.72080500 | -0.07527786 | H  | -0.76201800 | -0.31930038 | -1.53562254 |
| H | 2.31836853  | -4.77326512 | -1.83182988 | H  | -2.33704874 | 1.24623870  | -0.98802998 |

Table S3h: Optimized XYZ coordinates for complex **14**

|   |             |             |             |    |             |             |             |
|---|-------------|-------------|-------------|----|-------------|-------------|-------------|
| C | 2.36915624  | 1.13827196  | -1.39986941 | H  | -0.58813895 | 4.01368579  | 0.44265767  |
| C | 3.20105948  | 1.18958093  | -2.52702639 | H  | -1.22666265 | 2.53832448  | 1.20964288  |
| C | 3.45174866  | 0.01132719  | -3.24461120 | H  | -0.86636363 | 3.98259042  | 2.20731087  |
| C | 2.89170000  | -1.20450341 | -2.82905406 | N  | 0.65400454  | -2.10598117 | -0.01422754 |
| C | 2.06260214  | -1.22332549 | -1.69775261 | N  | 1.79799006  | -0.05318891 | -1.03090527 |
| H | 3.65390113  | 2.13648344  | -2.82628355 | N  | 1.23276923  | 1.89049847  | 0.52949998  |
| H | 4.09914296  | 0.03829647  | -4.12263942 | Ru | 0.68597160  | -0.11274827 | 0.57077641  |
| H | 3.10089388  | -2.13174726 | -3.36548589 | C  | -2.22410502 | -0.49077778 | -0.66176838 |
| C | 1.39274395  | -2.34488529 | -1.08203038 | C  | -3.68010627 | -0.15015671 | -0.37090787 |
| H | 1.49457600  | -3.34891754 | -1.50275790 | C  | -4.09448144 | 1.18623392  | -0.25116462 |
| C | 2.02855226  | 2.19437068  | -0.47255707 | C  | -4.63838120 | -1.16842942 | -0.25223512 |
| H | 2.45526713  | 3.19450414  | -0.59085234 | C  | -5.43903631 | 1.49478480  | -0.02253107 |
| C | -0.01919829 | -3.22619673 | 0.68897278  | H  | -3.34743784 | 1.97930416  | -0.32684958 |
| H | -0.99367001 | -2.80859215 | 0.99427477  | C  | -5.98531285 | -0.86206740 | -0.02823593 |
| C | 0.76249128  | -3.55720118 | 1.96885246  | H  | -4.32497388 | -2.21438494 | -0.33212891 |
| H | 0.94042598  | -2.65134524 | 2.56309279  | C  | -6.38950081 | 0.47243403  | 0.08730019  |
| H | 0.19459717  | -4.28431233 | 2.56948191  | H  | -5.74754477 | 2.53899608  | 0.07331196  |
| H | 1.74217192  | -3.99331444 | 1.71893882  | H  | -6.71860616 | -1.66702812 | 0.06531575  |
| C | -0.27568988 | -4.47187174 | -0.16564756 | H  | -7.43941617 | 0.71463246  | 0.26838433  |
| H | -0.79062195 | -4.22620897 | -1.10777485 | O  | -1.36569845 | 0.42429441  | 0.02614577  |
| H | 0.65356725  | -5.01474029 | -0.40153108 | Cl | 2.59315378  | -0.48632384 | 1.97424058  |
| H | -0.91675182 | -5.16453148 | 0.39960058  | H  | -0.42697651 | -0.17531803 | 1.98796137  |
| C | 0.90013774  | 2.88975574  | 1.56887558  | H  | -1.07371629 | 0.08647125  | 1.23104663  |
| H | 0.92912863  | 2.30261601  | 2.50224298  | H  | -2.04616665 | -1.52520025 | -0.30845117 |
| C | 1.89107456  | 4.05022449  | 1.69528633  | C  | -1.92070628 | -0.42673649 | -2.16380284 |
| H | 1.84839872  | 4.73520588  | 0.83256199  | H  | -0.87005492 | -0.69474316 | -2.35079085 |
| H | 1.63380314  | 4.64061044  | 2.58730378  | H  | -2.57024587 | -1.11495789 | -2.72723822 |
| H | 2.92299303  | 3.68753228  | 1.81513876  | H  | -2.09396831 | 0.59450663  | -2.53589875 |
| C | -0.53807858 | 3.38267872  | 1.34504934  |    |             |             |             |

Table S3i: Optimized XYZ coordinates for complex **12** and **6'**

|   |             |             |             |    |             |             |             |
|---|-------------|-------------|-------------|----|-------------|-------------|-------------|
| C | -1.53290475 | -0.46119051 | -1.79865503 | N  | -1.00909012 | -1.02512862 | -0.65307081 |
| C | -2.07441743 | -1.28476648 | -2.79487914 | N  | -0.84439617 | 1.51702228  | -0.70851057 |
| C | -2.07453937 | -2.67498599 | -2.61234327 | Ru | -0.23797478 | 0.12134253  | 0.69943212  |
| C | -1.53792623 | -3.23573890 | -1.44408202 | H  | -1.63989902 | 0.19804562  | 1.39969694  |
| C | -1.00282446 | -2.39225626 | -0.46020069 | C  | -1.98321778 | 3.83984939  | 2.99101243  |
| H | -2.49297776 | -0.83717212 | -3.69795376 | C  | -0.89284367 | 4.47873841  | 3.57918822  |
| H | -2.49428429 | -3.32353292 | -3.38289958 | C  | -0.99897130 | 5.81245402  | 4.00152027  |
| H | -1.53086126 | -4.31674797 | -1.29205389 | C  | -2.20386464 | 6.50414016  | 3.82972027  |
| C | -0.40460383 | -2.73641765 | 0.80694022  | C  | -3.29436117 | 5.86608701  | 3.23608820  |
| H | -0.33818145 | -3.77951193 | 1.12871584  | C  | -3.20718414 | 4.52349870  | 2.80270247  |
| C | -1.42070579 | 0.97709642  | -1.76852997 | H  | -1.87163403 | 2.79920519  | 2.67677010  |
| H | -1.80499328 | 1.58453775  | -2.59245472 | H  | 0.04208323  | 3.92652953  | 3.69763850  |
| C | 0.68978293  | -2.01843353 | 2.86051219  | H  | -0.14242742 | 6.30923353  | 4.46348126  |
| H | 0.41186846  | -1.15203423 | 3.48171739  | H  | -2.29306818 | 7.54233521  | 4.15828363  |
| C | 2.21499711  | -1.98395485 | 2.67446543  | H  | -4.23623137 | 6.40444897  | 3.09831971  |
| H | 2.52517039  | -1.02569821 | 2.23619656  | C  | -4.37855609 | 3.91776120  | 2.18176913  |
| H | 2.71117000  | -2.09249639 | 3.65084564  | H  | -5.27174927 | 4.55134122  | 2.10810629  |
| H | 2.54523316  | -2.80856515 | 2.02180737  | C  | -4.51009844 | 2.66519249  | 1.67742396  |
| C | 0.22118743  | -3.30271652 | 3.55096270  | H  | -3.67952815 | 1.95751063  | 1.71082875  |
| H | -0.87679599 | -3.35183913 | 3.61375829  | C  | -5.80534126 | 2.23985633  | 1.09377594  |
| H | 0.58794813  | -4.21178909 | 3.04703906  | C  | -5.93121360 | 0.84938397  | 0.52628821  |
| H | 0.61873003  | -3.32172667 | 4.57657657  | C  | -4.84752399 | -0.03287498 | 0.35529146  |
| C | -0.66237876 | 2.98834415  | -0.62745483 | C  | -7.21686298 | 0.42870962  | 0.13316677  |
| H | -0.77305104 | 3.21525785  | 0.44465237  | C  | -5.04848216 | -1.30398615 | -0.19406315 |
| C | 0.78431949  | 3.32411798  | -1.02323257 | H  | -3.83378712 | 0.26038393  | 0.63587828  |
| H | 0.96220752  | 3.08435855  | -2.08432609 | C  | -7.41813582 | -0.84062096 | -0.40648587 |
| H | 0.96951786  | 4.39843525  | -0.87286461 | H  | -8.04113457 | 1.13240257  | 0.26659751  |
| H | 1.49323427  | 2.76243922  | -0.39955169 | C  | -6.33217872 | -1.71194451 | -0.57201412 |
| C | -1.68511919 | 3.81144811  | -1.41535342 | H  | -4.19745344 | -1.97580286 | -0.32912018 |
| H | -1.53914204 | 3.73762644  | -2.50541320 | H  | -8.42232628 | -1.15553224 | -0.70074759 |
| H | -2.71724230 | 3.51593705  | -1.17226218 | H  | -6.48713048 | -2.70721330 | -0.99625579 |
| H | -1.56946655 | 4.87148830  | -1.14530051 | O  | -6.78205943 | 2.99774166  | 1.07273359  |
| N | 0.04473498  | -1.74176714 | 1.55288680  | Cl | 0.99524240  | 1.48899648  | 2.23072975  |

Table S3j: Optimized XYZ coordinates for complex 15

|   |             |             |             |    |             |             |             |
|---|-------------|-------------|-------------|----|-------------|-------------|-------------|
| C | -2.98488522 | 1.15912867  | -0.22230070 | N  | -2.36262368 | 0.05157314  | 0.27716438  |
| C | -4.35824076 | 1.34995085  | 0.02192873  | N  | -0.82405009 | 1.57733155  | -1.08828681 |
| C | -5.05602825 | 0.38883936  | 0.75715214  | Ru | -0.43890459 | -0.22006333 | -0.18997155 |
| C | -4.40059208 | -0.76118631 | 1.23018271  | H  | 1.01926590  | -0.37678054 | -0.94826129 |
| C | -3.03527191 | -0.91180394 | 0.96130184  | C  | 0.97565336  | 3.07658337  | 1.53880724  |
| H | -4.86362528 | 2.23428906  | -0.36981071 | C  | 0.60766302  | 4.33456970  | 2.02652595  |
| H | -6.12115236 | 0.52438521  | 0.95364691  | C  | -0.41303729 | 4.45840226  | 2.97602646  |
| H | -4.94044234 | -1.53012971 | 1.78532175  | C  | -1.05518247 | 3.30275632  | 3.43923526  |
| C | -2.17365102 | -2.02966936 | 1.30955377  | C  | -0.68672130 | 2.04833969  | 2.95088626  |
| H | -2.59584474 | -2.88254866 | 1.85048820  | C  | 0.32955271  | 1.90285572  | 1.98053646  |
| C | -2.07915600 | 1.98646302  | -0.97484068 | H  | 1.79979474  | 3.00875061  | 0.82439435  |
| H | -2.42468499 | 2.91228595  | -1.43951980 | H  | 1.13683778  | 5.22410003  | 1.67422424  |
| C | -0.02975848 | -3.13680328 | 1.26236692  | H  | -0.69528479 | 5.44115817  | 3.36022412  |
| H | 0.84436409  | -2.67383477 | 1.75159118  | H  | -1.84624980 | 3.37986427  | 4.18961667  |
| C | 0.45573792  | -3.76698219 | -0.05134638 | H  | -1.19468100 | 1.15161420  | 3.31727615  |
| H | 0.86311870  | -3.00419811 | -0.72783381 | C  | 0.68497117  | 0.54233146  | 1.51705377  |
| H | 1.23686068  | -4.51010956 | 0.16891122  | H  | 0.63438728  | -0.21721662 | 2.30432353  |
| H | -0.37584971 | -4.25920926 | -0.57789141 | C  | 1.63575563  | 0.26147374  | 0.46541366  |
| C | -0.61127944 | -4.18877578 | 2.21044452  | H  | 2.05156501  | 1.12161447  | -0.07230738 |
| H | -0.95184594 | -3.75155596 | 3.16259167  | C  | 2.66259094  | -0.82918773 | 0.66957352  |
| H | -1.44615472 | -4.74746626 | 1.75581985  | C  | 3.75654092  | -0.99027180 | -0.34788090 |
| H | 0.17751193  | -4.91793970 | 2.44633562  | C  | 3.75307796  | -0.34993283 | -1.60197934 |
| C | 0.10638784  | 2.36255630  | -1.93915273 | C  | 4.83625491  | -1.83121856 | -0.01604800 |
| H | 1.08869983  | 2.25041950  | -1.45254369 | C  | 4.80637175  | -0.54592503 | -2.49946938 |
| C | 0.18030952  | 1.70892205  | -3.32772199 | H  | 2.91314889  | 0.28153754  | -1.89862432 |
| H | -0.76597567 | 1.85966843  | -3.87040044 | C  | 5.89130720  | -2.01883652 | -0.90810109 |
| H | 0.99462749  | 2.16491050  | -3.91240854 | H  | 4.81783487  | -2.32483831 | 0.95769459  |
| H | 0.34255445  | 0.62496235  | -3.24534161 | C  | 5.87877808  | -1.37595814 | -2.15334017 |
| C | -0.19837800 | 3.86255847  | -2.02281313 | H  | 4.78644819  | -0.05515502 | -3.47513997 |
| H | -1.09430975 | 4.07404431  | -2.62774798 | H  | 6.72672194  | -2.66831143 | -0.63625531 |
| H | -0.32678955 | 4.30494005  | -1.02343577 | H  | 6.70229099  | -1.52570542 | -2.85568154 |
| H | 0.64549610  | 4.36822067  | -2.51632540 | O  | 2.64063544  | -1.54990855 | 1.66879424  |
| N | -0.91755993 | -1.99448304 | 0.94953734  | Cl | -1.22684307 | -1.47489627 | -2.18294442 |



Table S3k: Optimized XYZ coordinates for complex 16

|   |             |             |             |    |             |             |             |
|---|-------------|-------------|-------------|----|-------------|-------------|-------------|
| C | 2.40856329  | -1.11243207 | -0.92736940 | N  | 1.58640686  | -0.19459807 | -1.55509142 |
| C | 3.67967968  | -1.37881658 | -1.45029536 | N  | 0.51935757  | -1.32280577 | 0.46559470  |
| C | 4.09935023  | -0.72662134 | -2.61829895 | Ru | -0.20021418 | 0.07417256  | -0.89455298 |
| C | 3.23903491  | 0.16288910  | -3.27522325 | H  | 1.20198753  | 3.68242730  | 0.50096680  |
| C | 1.96796770  | 0.41444088  | -2.73897469 | C  | -1.34292863 | 1.47210379  | 2.24312659  |
| H | 4.33026571  | -2.09183008 | -0.94061504 | C  | -1.59324581 | 1.27358675  | 3.60258194  |
| H | 5.09170748  | -0.92507507 | -3.02641100 | C  | -0.52808320 | 1.12681137  | 4.49998995  |
| H | 3.54060361  | 0.65851650  | -4.19984784 | C  | 0.78452809  | 1.17820229  | 4.01599200  |
| C | 0.90285577  | 1.21039873  | -3.28555463 | C  | 1.03696759  | 1.37640413  | 2.65448742  |
| H | 1.02974313  | 1.73810852  | -4.23591401 | C  | -0.02404347 | 1.53412296  | 1.73666182  |
| C | 1.76297092  | -1.69727885 | 0.21383020  | H  | -2.17964826 | 1.56560389  | 1.54563883  |
| H | 2.27943761  | -2.44096136 | 0.82632280  | H  | -2.62477649 | 1.23509668  | 3.96179725  |
| C | -1.41502227 | 1.93434717  | -3.19300445 | H  | -0.71929886 | 0.97464202  | 5.56508764  |
| H | -2.09437405 | 2.07881166  | -2.33849662 | H  | 1.62497231  | 1.06468219  | 4.70626647  |
| C | -2.12575087 | 1.01088717  | -4.19346779 | H  | 2.06384968  | 1.39044644  | 2.28954943  |
| H | -2.39256513 | 0.06260430  | -3.70722844 | C  | 0.15587158  | 1.81427574  | 0.27610231  |
| H | -3.05054663 | 1.48736332  | -4.55369276 | C  | 1.27321110  | 2.77886822  | -0.14246409 |
| H | -1.47946398 | 0.80415636  | -5.06233488 | H  | 1.05080150  | 3.13843954  | -1.15999451 |
| C | -1.07886789 | 3.30186083  | -3.80094139 | C  | 2.74699465  | 2.38972949  | -0.12022868 |
| H | -0.51874026 | 3.93123693  | -3.09192800 | C  | 3.71688269  | 3.32655464  | -0.80172291 |
| H | -0.49301795 | 3.21880729  | -4.73025242 | C  | 3.34816196  | 4.56603092  | -1.35891974 |
| H | -2.01309771 | 3.82614016  | -4.05291718 | C  | 5.06749812  | 2.93249069  | -0.85860874 |
| C | -0.23250123 | -1.97574255 | 1.56637158  | C  | 4.30782377  | 5.38815543  | -1.95786833 |
| H | -0.90397167 | -1.18862279 | 1.94330644  | H  | 2.31113053  | 4.90433475  | -1.31976212 |
| C | -1.09806270 | -3.10069643 | 0.97553186  | C  | 6.02304487  | 3.74885851  | -1.46254375 |
| H | -0.46081391 | -3.90065342 | 0.56359700  | H  | 5.33508101  | 1.97105199  | -0.41565768 |
| H | -1.73189207 | -3.53458425 | 1.76436093  | C  | 5.64533084  | 4.98071593  | -2.01418338 |
| H | -1.75020253 | -2.71043524 | 0.18261185  | H  | 4.01068979  | 6.35068840  | -2.38069251 |
| C | 0.63377028  | -2.47694176 | 2.72741976  | H  | 7.06707838  | 3.42905009  | -1.50281773 |
| H | 1.22545491  | -3.36740506 | 2.45804890  | H  | 6.39320523  | 5.62353579  | -2.48472264 |
| H | 1.31037162  | -1.68995629 | 3.09133140  | O  | 3.17526280  | 1.38360173  | 0.43722035  |
| H | -0.02409680 | -2.76744336 | 3.56006928  | Cl | -2.59090486 | -0.22634010 | -0.70511725 |
| N | -0.24171095 | 1.22725249  | -2.61719173 | H  | -0.77958273 | 2.28901206  | -0.07565158 |

Table S31: Optimized XYZ coordinates for complex 17

|   |             |             |             |    |             |             |             |
|---|-------------|-------------|-------------|----|-------------|-------------|-------------|
| C | 2.02439667  | -1.54336761 | -2.29443908 | N  | 1.13839565  | -1.47672941 | -0.09600850 |
| C | 2.82571648  | -1.96012136 | -3.37014304 | Ru | -0.01818494 | 0.00627390  | -0.93733707 |
| C | 2.67806221  | -1.33126874 | -4.61249041 | H  | 2.76790606  | 3.14262229  | -0.73850800 |
| C | 1.71859198  | -0.32160827 | -4.79083941 | C  | 0.03097405  | 3.01832063  | 2.06157768  |
| C | 0.92778053  | 0.05665364  | -3.69697403 | C  | 0.08949648  | 3.49610557  | 3.37146507  |
| H | 3.54730332  | -2.76733510 | -3.23292177 | C  | 1.30503161  | 3.49346191  | 4.06678584  |
| H | 3.30117780  | -1.64056631 | -5.45338266 | C  | 2.45107855  | 3.00555279  | 3.43255970  |
| H | 1.57200872  | 0.14857239  | -5.76505425 | C  | 2.38979377  | 2.51785739  | 2.12195428  |
| C | -0.20088886 | 0.96601938  | -3.67154568 | C  | 1.17778376  | 2.51833412  | 1.40552452  |
| H | -0.55783210 | 1.40660358  | -4.60716189 | H  | -0.92427686 | 3.03453610  | 1.52898089  |
| C | 1.97855202  | -2.04453971 | -0.94330105 | H  | -0.81633354 | 3.87742059  | 3.84930639  |
| H | 2.62411141  | -2.86903513 | -0.62259607 | H  | 1.35640143  | 3.86861617  | 5.09147753  |
| C | -2.15844315 | 1.81463813  | -2.52433114 | H  | 3.40689920  | 2.99582268  | 3.96261656  |
| H | -2.81856855 | 0.99032623  | -2.19204630 | H  | 3.29224444  | 2.11499945  | 1.66403850  |
| C | -2.65829880 | 2.32286818  | -3.87956391 | C  | 1.04421931  | 2.06005493  | -0.02951895 |
| H | -2.72735218 | 1.51812889  | -4.62693600 | C  | 2.30164727  | 2.14541170  | -0.90478560 |
| H | -3.66882372 | 2.73730316  | -3.75064898 | H  | 1.98501237  | 2.15040036  | -1.95977608 |
| H | -2.02094423 | 3.12881968  | -4.28100330 | C  | 3.44195605  | 1.14608578  | -0.76586542 |
| C | -2.21324959 | 2.91416390  | -1.45986587 | C  | 4.52369076  | 1.17241574  | -1.81713223 |
| H | -1.93459592 | 2.50451470  | -0.47999902 | C  | 4.50565634  | 2.02287196  | -2.93890691 |
| H | -1.53924003 | 3.74986961  | -1.71086372 | C  | 5.61660529  | 0.30071672  | -1.64521082 |
| H | -3.23658844 | 3.31167485  | -1.38803145 | C  | 5.55317055  | 1.99765646  | -3.86503519 |
| C | 1.06574754  | -2.06356356 | 1.26467549  | H  | 3.67570480  | 2.71341991  | -3.09795496 |
| H | 1.88582133  | -2.80395246 | 1.33984424  | C  | 6.65997964  | 0.27421720  | -2.56921919 |
| C | 1.28254409  | -0.99367281 | 2.33514189  | H  | 5.61689047  | -0.34677047 | -0.76590126 |
| H | 0.44908444  | -0.27602424 | 2.34222783  | C  | 6.63066231  | 1.12384162  | -3.68387715 |
| H | 1.32843158  | -1.47471891 | 3.32464565  | H  | 5.52818863  | 2.66330336  | -4.73091487 |
| H | 2.21499397  | -0.44297390 | 2.15809655  | H  | 7.50235687  | -0.40593715 | -2.42212241 |
| C | -0.27262999 | -2.79099365 | 1.43982595  | H  | 7.44833826  | 1.10642144  | -4.40845600 |
| H | -1.10910602 | -2.08603000 | 1.33418375  | O  | 3.53031132  | 0.36377658  | 0.17642119  |
| H | -0.40505458 | -3.57629831 | 0.68237890  | Cl | -1.73913973 | -1.59564619 | -1.53132462 |
| H | -0.30788778 | -3.24775973 | 2.44145315  | H  | 0.31318466  | 2.72637738  | -0.50366737 |
| N | -0.82923305 | 1.15617972  | -2.53026938 | H  | 0.09058800  | 1.03915213  | 0.37773310  |
| N | 1.12613289  | -0.52596386 | -2.47659081 | H  | -0.95002017 | 0.44103156  | 0.40647509  |

Table S3m: Optimized XYZ coordinates for complex **18**

|    |             |             |             |    |             |             |             |
|----|-------------|-------------|-------------|----|-------------|-------------|-------------|
| C  | 1.34989260  | -2.70211736 | -1.15718317 | C  | -0.00275068 | -1.37717341 | 3.08784742  |
| C  | 2.45506630  | -3.48151251 | -1.51980689 | C  | -0.69395484 | -0.27018217 | 2.55285307  |
| C  | 3.56203467  | -2.86745509 | -2.12257034 | H  | -2.54691024 | 0.85081132  | 2.66341962  |
| C  | 3.55228123  | -1.48993309 | -2.37011653 | H  | -3.56101110 | -0.55290776 | 4.42672521  |
| C  | 2.43152729  | -0.73654045 | -1.99055701 | H  | -2.29603694 | -2.49724604 | 5.37188220  |
| H  | 2.43727351  | -4.55820895 | -1.34212719 | H  | -0.01040486 | -3.00706124 | 4.49945282  |
| H  | 4.42538028  | -3.46788370 | -2.41427238 | H  | 0.98198786  | -1.62966482 | 2.69558752  |
| H  | 4.39434083  | -0.99795100 | -2.86019168 | C  | -0.14921086 | 0.63756621  | 1.48346289  |
| C  | 2.20638771  | 0.67777008  | -2.14069305 | C  | 1.30343140  | 1.12942266  | 1.60567050  |
| H  | 2.97939220  | 1.31577502  | -2.57862581 | H  | 1.43147181  | 2.00680285  | 0.95007475  |
| C  | 0.10587729  | -3.13143363 | -0.56483941 | C  | 2.50361254  | 0.22442920  | 1.37487498  |
| H  | -0.05053922 | -4.17963568 | -0.29703060 | C  | 3.86570196  | 0.87491222  | 1.35252405  |
| C  | 0.78669609  | 2.61173612  | -1.89433616 | C  | 4.08852078  | 2.23289583  | 1.65326862  |
| H  | 0.11426889  | 2.87132986  | -1.05952499 | C  | 4.96855586  | 0.06302793  | 1.02394959  |
| C  | 0.01657917  | 2.81120590  | -3.20906647 | C  | 5.38187161  | 2.76391565  | 1.62010952  |
| H  | -0.81755363 | 2.10129708  | -3.28718300 | H  | 3.25607329  | 2.88295705  | 1.92932519  |
| H  | -0.36962200 | 3.84049136  | -3.26917619 | C  | 6.25729705  | 0.59481793  | 0.98454935  |
| H  | 0.68420377  | 2.63651569  | -4.06771322 | H  | 4.77865081  | -0.98916673 | 0.80212530  |
| C  | 2.01951891  | 3.52271134  | -1.81506644 | C  | 6.46764754  | 1.94805436  | 1.28241140  |
| H  | 2.63151014  | 3.31397511  | -0.92346096 | H  | 5.54293949  | 3.81691440  | 1.86229563  |
| H  | 2.66236622  | 3.43454677  | -2.70507193 | H  | 7.10369077  | -0.04550001 | 0.72483149  |
| H  | 1.68675558  | 4.57047365  | -1.76434369 | H  | 7.47711958  | 2.36521718  | 1.25579345  |
| C  | -2.13543557 | -2.57821608 | 0.20361679  | O  | 2.41267587  | -0.99010125 | 1.22577233  |
| H  | -2.36340288 | -1.75928452 | 0.90537676  | Cl | -0.99090415 | -0.74750621 | -3.20326890 |
| C  | -3.17855654 | -2.53776115 | -0.92407675 | H  | -0.71006879 | 1.59045452  | 1.61078704  |
| H  | -2.98414395 | -3.33311355 | -1.66072943 | O  | -2.11860768 | 0.52249773  | -0.34282186 |
| H  | -4.18222173 | -2.69006941 | -0.49733548 | C  | -2.57134913 | 1.78414010  | -0.77057047 |
| H  | -3.14823657 | -1.56998072 | -1.43904195 | H  | -1.84965341 | 2.59149209  | -0.50557986 |
| C  | -2.16726811 | -3.90355367 | 0.96917584  | H  | -2.65942531 | 1.79748337  | -1.87616519 |
| H  | -2.05963668 | -4.77461732 | 0.30182679  | C  | -3.92065138 | 2.14984853  | -0.17046040 |
| H  | -1.39063814 | -3.94271950 | 1.74767829  | C  | -4.69606266 | 1.20116625  | 0.51046831  |
| H  | -3.14333839 | -3.99701408 | 1.46764482  | C  | -4.42048711 | 3.45508609  | -0.31508459 |
| N  | 1.05723353  | 1.16462179  | -1.71360944 | C  | -5.94610759 | 1.55113460  | 1.03714175  |
| N  | 1.37079079  | -1.34660062 | -1.37323012 | H  | -4.30201101 | 0.18926944  | 0.61917700  |
| N  | -0.81535964 | -2.21567631 | -0.35899858 | C  | -5.66890021 | 3.80494626  | 0.20666228  |
| Ru | -0.23019494 | -0.33400728 | -0.97607273 | H  | -3.82415535 | 4.20567483  | -0.84465471 |
| H  | 1.43822905  | 1.52525660  | 2.63550406  | C  | -6.43755582 | 2.85184132  | 0.88754272  |
| C  | -1.98559100 | 0.00009565  | 3.06049411  | H  | -6.54051330 | 0.80051899  | 1.56494467  |
| C  | -2.56117801 | -0.79375222 | 4.05641073  | H  | -6.04295025 | 4.82487283  | 0.08552612  |
| C  | -1.85540226 | -1.88047439 | 4.58496601  | H  | -7.41297365 | 3.12393266  | 1.29796259  |
| C  | -0.57483652 | -2.16227461 | 4.09497415  | H  | -1.05191609 | 0.56778895  | 0.47538348  |

Table S3n: Optimized XYZ coordinates for complex **12** and **6**

|   |             |             |             |    |             |             |             |
|---|-------------|-------------|-------------|----|-------------|-------------|-------------|
| C | 1.92878339  | 0.69068991  | 2.19800275  | N  | 0.12025996  | -0.78373277 | 1.83294170  |
| C | 2.72505311  | 1.65360183  | 2.83441456  | Ru | 1.21660066  | -1.15750437 | 0.11474905  |
| C | 3.91004833  | 2.08188933  | 2.21821045  | H  | 0.47044267  | -0.00151862 | -0.63471803 |
| C | 4.29448881  | 1.55161457  | 0.97776570  | C  | -3.65989345 | -1.77332178 | -0.75356489 |
| C | 3.48397868  | 0.58867810  | 0.36116249  | C  | -3.98606955 | -2.85955644 | 0.06595251  |
| H | 2.41560586  | 2.05953350  | 3.79938889  | C  | -5.00641448 | -2.74197945 | 1.01838926  |
| H | 4.53650646  | 2.82994442  | 2.70683991  | C  | -5.69475508 | -1.52956639 | 1.14586951  |
| H | 5.21383197  | 1.87846273  | 0.48834976  | C  | -5.36377027 | -0.44531949 | 0.32454537  |
| C | 3.67442825  | -0.08983768 | -0.89753172 | C  | -4.34417814 | -0.54991856 | -0.63748860 |
| H | 4.54166752  | 0.13113998  | -1.52592980 | H  | -2.85398777 | -1.88197903 | -1.48519244 |
| C | 0.67725162  | 0.11591050  | 2.62695518  | H  | -3.43483633 | -3.79652303 | -0.04412144 |
| H | 0.21178445  | 0.42641685  | 3.56649341  | H  | -5.26930458 | -3.59315628 | 1.65151346  |
| C | 2.89767982  | -1.73092668 | -2.52071106 | H  | -6.49873451 | -1.42975634 | 1.87982067  |
| H | 1.85989777  | -1.86493849 | -2.86562055 | H  | -5.91235682 | 0.49673433  | 0.42123988  |
| C | 3.46167918  | -3.12463727 | -2.20191295 | C  | -3.97731060 | 0.63035992  | -1.50957004 |
| H | 2.82683725  | -3.63425809 | -1.46444371 | H  | -4.81468438 | 1.34336054  | -1.55961754 |
| H | 3.48338438  | -3.73526815 | -3.11731226 | C  | -2.72640239 | 1.36769070  | -1.00800737 |
| H | 4.48878121  | -3.04756699 | -1.80926050 | H  | -1.84905807 | 0.69515943  | -1.01887386 |
| C | 3.70219255  | -1.01834996 | -3.61164105 | C  | -2.41232574 | 2.62236976  | -1.81617787 |
| H | 3.33575238  | 0.00566289  | -3.78196531 | C  | -1.19507384 | 3.42964520  | -1.45328789 |
| H | 4.77959860  | -0.97562744 | -3.38282633 | C  | -0.28154357 | 3.03873329  | -0.45681378 |
| H | 3.59594558  | -1.57564451 | -4.55420753 | C  | -0.96989633 | 4.62906172  | -2.15510713 |
| C | -1.16342793 | -1.42276546 | 2.21446016  | C  | 0.83449858  | 3.83199874  | -0.17024578 |
| H | -1.70352537 | -1.53712152 | 1.26135356  | H  | -0.42555786 | 2.10518232  | 0.09076907  |
| C | -0.87000626 | -2.83307499 | 2.74976726  | C  | 0.13966717  | 5.42227901  | -1.86588766 |
| H | -0.30471850 | -2.78062212 | 3.69479254  | H  | -1.68997750 | 4.90985086  | -2.92677161 |
| H | -1.81832294 | -3.35869870 | 2.93792769  | C  | 1.04497433  | 5.02461131  | -0.87179969 |
| H | -0.29580943 | -3.41135023 | 2.01306595  | H  | 1.54239180  | 3.51494761  | 0.59962653  |
| C | -2.03421590 | -0.61283934 | 3.17871057  | H  | 0.30393701  | 6.35264163  | -2.41490605 |
| H | -1.62530168 | -0.58941193 | 4.20241791  | H  | 1.91643229  | 5.64426538  | -0.64584899 |
| H | -2.17358554 | 0.42222273  | 2.82947765  | O  | -3.14226263 | 2.97962176  | -2.73602526 |
| H | -3.02792542 | -1.08124730 | 3.23040554  | Cl | 0.00711168  | -2.98274559 | -0.85346606 |
| N | 2.75761755  | -0.97397019 | -1.25204233 | H  | -3.79992029 | 0.29795931  | -2.54500992 |
| N | 2.32080072  | 0.17437691  | 0.97893251  | H  | -2.85202606 | 1.66104201  | 0.05122805  |

Table S3o: Optimized XYZ coordinates for complex **20**

|   |             |             |             |    |             |             |             |
|---|-------------|-------------|-------------|----|-------------|-------------|-------------|
| C | 1.92790098  | -1.06097714 | -1.13630101 | N  | 0.71342136  | -0.05674973 | 0.62963330  |
| C | 2.48313857  | -2.08958556 | -1.90955239 | Ru | 1.77704085  | 1.63648819  | -0.08521284 |
| C | 3.31820448  | -1.75560407 | -2.98694656 | C  | 3.57360199  | 2.01402875  | 1.63007199  |
| C | 3.60949230  | -0.41446656 | -3.26753453 | C  | 4.58349127  | 2.98265700  | 1.08453138  |
| C | 3.04631907  | 0.59086221  | -2.46424141 | C  | 4.83630054  | 4.23114740  | 1.68566344  |
| H | 2.26750491  | -3.13189683 | -1.66762071 | C  | 5.41341817  | 2.56463729  | 0.02569120  |
| H | 3.75034866  | -2.54553903 | -3.60373556 | C  | 5.87604877  | 5.04505428  | 1.22875073  |
| H | 4.26098222  | -0.14428685 | -4.10085572 | H  | 4.20582303  | 4.58671551  | 2.50249340  |
| C | 3.16187704  | 2.02026949  | -2.58102169 | C  | 6.44860791  | 3.38020643  | -0.43268874 |
| H | 3.60575433  | 2.46721011  | -3.47323832 | H  | 5.23680510  | 1.58053451  | -0.41139995 |
| C | 1.02034344  | -1.15993514 | -0.01793899 | C  | 6.68496762  | 4.62513394  | 0.16611109  |
| H | 0.55351899  | -2.12066767 | 0.22782626  | H  | 6.05321666  | 6.01335739  | 1.70273019  |
| C | 2.31599266  | 4.19341577  | -1.91565032 | H  | 7.08588102  | 3.03797663  | -1.25197490 |
| H | 1.21341749  | 4.18203104  | -2.01936447 | H  | 7.50064900  | 5.26019389  | -0.18750236 |
| C | 2.92845914  | 4.74478232  | -3.20652742 | Cl | -0.32498750 | 2.68922724  | -0.59027484 |
| H | 2.57690478  | 4.21748236  | -4.10650813 | C  | 3.33623592  | 2.09904730  | 3.13880885  |
| H | 2.63037915  | 5.79837682  | -3.31018239 | H  | 4.32691090  | 1.91531508  | 3.59900402  |
| H | 4.03069424  | 4.71423008  | -3.18157907 | H  | 3.05828367  | 3.12223950  | 3.43084787  |
| C | 2.64250789  | 5.08724302  | -0.72113304 | C  | 2.32025746  | 1.09451596  | 3.68495067  |
| H | 2.21649417  | 4.66057151  | 0.19708844  | H  | 2.60062828  | 0.09076504  | 3.33046552  |
| H | 3.72819958  | 5.20788821  | -0.59607879 | H  | 1.33912957  | 1.32755059  | 3.24308964  |
| H | 2.19771085  | 6.08148077  | -0.87996162 | C  | 2.23595555  | 1.12375537  | 5.19393660  |
| C | -0.42790379 | -0.10696228 | 1.58723999  | C  | 3.06675485  | 0.30577211  | 5.97926469  |
| H | -0.42578435 | 0.87944384  | 2.07255601  | C  | 1.34506246  | 1.99161953  | 5.84919281  |
| C | -1.75223477 | -0.25485879 | 0.82166057  | C  | 3.01247607  | 0.35414675  | 7.37625164  |
| H | -1.81516020 | -1.24114258 | 0.33314260  | H  | 3.76039774  | -0.38200423 | 5.48578267  |
| H | -2.59637359 | -0.16638183 | 1.52329156  | C  | 1.28699982  | 2.04350851  | 7.24599547  |
| H | -1.84137022 | 0.53083967  | 0.05970895  | H  | 0.68462191  | 2.62925263  | 5.25346762  |
| C | -0.26856831 | -1.19911650 | 2.65475798  | C  | 2.12210286  | 1.22490300  | 8.01474964  |
| H | -0.36916292 | -2.20869915 | 2.22510807  | H  | 3.66372346  | -0.29374675 | 7.96834017  |
| H | 0.70122534  | -1.13378544 | 3.16607048  | H  | 0.58359461  | 2.72162866  | 7.73565003  |
| H | -1.06145659 | -1.08680056 | 3.40972613  | H  | 2.07563842  | 1.26156447  | 9.10564896  |
| N | 2.60671049  | 2.76077862  | -1.63139352 | O  | 3.42833266  | 0.87185219  | 1.04631047  |
| N | 2.20414605  | 0.24831249  | -1.43563573 | H  | 1.80306538  | 2.66177724  | 1.28089628  |

Table S3p: Optimized XYZ coordinates for complex **21**

|   |             |             |             |    |             |             |             |
|---|-------------|-------------|-------------|----|-------------|-------------|-------------|
| C | 2.67038975  | -0.30389774 | -1.86420292 | N  | 1.20938339  | -0.42723856 | -0.02663666 |
| C | 3.54998024  | -0.73019976 | -2.86371303 | Ru | 1.19207585  | 1.62316228  | -0.40377039 |
| C | 4.03742997  | 0.19110879  | -3.80286670 | C  | 3.29220668  | 1.45237363  | 1.79546523  |
| C | 3.64078109  | 1.53180412  | -3.74187451 | C  | 4.54916171  | 1.05858186  | 1.02681093  |
| C | 2.76694767  | 1.95848442  | -2.73320842 | C  | 5.11779900  | 1.92680835  | 0.08253552  |
| H | 3.84276543  | -1.78079473 | -2.90138196 | C  | 5.18110575  | -0.16872434 | 1.28240837  |
| H | 4.72429339  | -0.13907542 | -4.58317065 | C  | 6.29287221  | 1.57510529  | -0.58990956 |
| H | 4.00453345  | 2.25920083  | -4.47010576 | H  | 4.61704955  | 2.87518364  | -0.12493512 |
| C | 2.21582817  | 3.25971799  | -2.49732919 | C  | 6.35866144  | -0.52208180 | 0.61428422  |
| H | 2.40475796  | 4.08623543  | -3.18708211 | H  | 4.74286523  | -0.85582185 | 2.01378490  |
| C | 1.99203946  | -1.08078772 | -0.86502452 | C  | 6.91837169  | 0.35050976  | -0.32618075 |
| H | 2.07703508  | -2.17009828 | -0.85866851 | H  | 6.72349100  | 2.26018449  | -1.32490044 |
| C | 0.75328439  | 4.65679720  | -1.12089275 | H  | 6.83798444  | -1.48176038 | 0.82472721  |
| H | -0.24410973 | 4.34046656  | -0.76849053 | H  | 7.83582307  | 0.07628892  | -0.85259180 |
| C | 0.56273534  | 5.60760816  | -2.30595714 | O  | 2.41835420  | 2.25285559  | 1.02353335  |
| H | 0.06332276  | 5.10641516  | -3.14868946 | Cl | -1.07514166 | 1.42570490  | -1.16392226 |
| H | -0.06971672 | 6.45062062  | -1.99007709 | C  | 3.67162840  | 2.26126720  | 3.05707251  |
| H | 1.51696942  | 6.03347228  | -2.65680111 | H  | 4.42561465  | 1.69380750  | 3.62948898  |
| C | 1.49822155  | 5.32524518  | 0.04692609  | H  | 4.15779188  | 3.19617415  | 2.72955062  |
| H | 1.69587886  | 4.59830165  | 0.84732816  | C  | 2.46316145  | 2.58626220  | 3.95523685  |
| H | 2.46680200  | 5.72347793  | -0.29681752 | H  | 2.00358735  | 1.64299275  | 4.29953010  |
| H | 0.90218294  | 6.15951227  | 0.44718989  | H  | 1.70698818  | 3.10788012  | 3.34752909  |
| C | 0.24641722  | -1.14672618 | 0.83901405  | C  | 2.84101083  | 3.43180738  | 5.14993513  |
| H | -0.72939576 | -0.86514290 | 0.39826167  | C  | 2.86047092  | 4.83467157  | 5.05992482  |
| C | 0.36840001  | -2.67198488 | 0.83268217  | C  | 3.21900557  | 2.83999998  | 6.36737057  |
| H | 1.34814548  | -3.00502211 | 1.21389517  | C  | 3.24575856  | 5.62175307  | 6.14993845  |
| H | -0.40419825 | -3.09406950 | 1.49189869  | H  | 2.56324155  | 5.31280133  | 4.12146672  |
| H | 0.21365794  | -3.10093102 | -0.16888785 | C  | 3.60474205  | 3.62234994  | 7.46112188  |
| C | 0.28396447  | -0.58244247 | 2.26304883  | H  | 3.20402505  | 1.74944610  | 6.45855886  |
| H | 1.19970034  | -0.89275173 | 2.79105374  | C  | 3.62017973  | 5.01762251  | 7.35571335  |
| H | 0.24246277  | 0.51680044  | 2.25155610  | H  | 3.24878338  | 6.71101533  | 6.05981006  |
| H | -0.58175486 | -0.95128016 | 2.83286122  | H  | 3.88978934  | 3.14124654  | 8.40022331  |
| N | 1.42921634  | 3.38468966  | -1.44270181 | H  | 3.91794360  | 5.63085733  | 8.20948615  |
| N | 2.30807965  | 1.03372394  | -1.80260372 | H  | 2.79393856  | 0.51727162  | 2.12361067  |

Table S3q: Optimized XYZ coordinates for complex **22**

|   |             |             |             |    |             |             |             |
|---|-------------|-------------|-------------|----|-------------|-------------|-------------|
| C | 1.81302555  | -0.31344215 | -2.51536784 | Ru | 1.57272975  | 1.68441316  | -0.45977564 |
| C | 2.13577796  | -0.80915297 | -3.78584267 | C  | 4.21715751  | 0.55367695  | 0.92480277  |
| C | 2.55937202  | 0.08414790  | -4.77978060 | C  | 4.79976875  | -0.16926486 | -0.27862777 |
| C | 2.65243474  | 1.45575917  | -4.50712871 | C  | 5.28138765  | 0.55108829  | -1.38290951 |
| C | 2.33248196  | 1.91999987  | -3.22339291 | C  | 4.90966059  | -1.56882578 | -0.28414288 |
| H | 2.04642989  | -1.87714689 | -3.99122390 | C  | 5.86058468  | -0.11500701 | -2.46787317 |
| H | 2.81027184  | -0.28971936 | -5.77379511 | H  | 5.18214616  | 1.63884999  | -1.38404156 |
| H | 2.96386048  | 2.16224531  | -5.27874596 | C  | 5.49209705  | -2.23764862 | -1.36651203 |
| C | 2.32566148  | 3.27404909  | -2.71866927 | H  | 4.53405262  | -2.14096341 | 0.57037897  |
| H | 2.53404291  | 4.11856084  | -3.38183158 | C  | 5.96956463  | -1.51088842 | -2.46327600 |
| C | 1.26241584  | -1.01749794 | -1.37995733 | H  | 6.22801214  | 0.45811061  | -3.32291372 |
| H | 0.96778332  | -2.06558042 | -1.47669707 | H  | 5.57020571  | -3.32786349 | -1.35532635 |
| C | 1.92587451  | 4.79706829  | -0.85972138 | H  | 6.42288279  | -2.03015931 | -3.31110464 |
| H | 1.08894547  | 4.70396870  | -0.14790379 | O  | 3.53820507  | 1.74915772  | 0.52914591  |
| C | 1.59548287  | 5.91284984  | -1.85520171 | Cl | -0.75528453 | 2.12798412  | -0.81692738 |
| H | 0.70142873  | 5.66817603  | -2.44788191 | C  | 5.33222008  | 0.93640280  | 1.92045776  |
| H | 1.39012033  | 6.83862727  | -1.29716703 | H  | 5.92383915  | 0.03403064  | 2.15266678  |
| H | 2.43239597  | 6.12857999  | -2.53943125 | H  | 6.01651407  | 1.64167927  | 1.41838556  |
| C | 3.21272915  | 5.08775073  | -0.07108680 | C  | 4.79930412  | 1.55979076  | 3.22459120  |
| H | 3.46852612  | 4.24479614  | 0.58483113  | H  | 4.12006518  | 0.84244456  | 3.71852369  |
| H | 4.05599018  | 5.24952095  | -0.76236596 | H  | 4.19920234  | 2.44987149  | 2.97516310  |
| H | 3.08424086  | 5.99536055  | 0.53792887  | C  | 5.90905871  | 1.94426288  | 4.17686643  |
| C | 0.21905626  | -0.90238186 | 0.81257042  | C  | 6.37885511  | 1.03980660  | 5.14439505  |
| H | -0.59672583 | -0.15945498 | 0.89384444  | C  | 6.52473518  | 3.20504486  | 4.09120978  |
| C | -0.39959299 | -2.27175745 | 0.51948551  | C  | 7.43114223  | 1.38187875  | 6.00039247  |
| H | 0.36323953  | -3.06397084 | 0.43622428  | H  | 5.90699499  | 0.05609641  | 5.23057320  |
| H | -1.06456492 | -2.54510592 | 1.35184164  | C  | 7.57745664  | 3.55197409  | 4.94414725  |
| H | -1.00522726 | -2.26234728 | -0.39921330 | H  | 6.16734039  | 3.92419215  | 3.34782944  |
| C | 0.98402061  | -0.90935506 | 2.14067939  | C  | 8.03516887  | 2.64030648  | 5.90240790  |
| H | 1.81771666  | -1.63005103 | 2.11260414  | H  | 7.77730285  | 0.66540714  | 6.74961923  |
| H | 1.37890544  | 0.09010079  | 2.36660555  | H  | 8.03879329  | 4.53953503  | 4.86424319  |
| H | 0.30640263  | -1.20353163 | 2.95622441  | H  | 8.85482787  | 2.91088147  | 6.57212322  |
| N | 2.02303833  | 3.44299288  | -1.44846383 | H  | 3.51450569  | -0.13350423 | 1.43265547  |
| N | 1.94204913  | 1.02735011  | -2.25668485 | H  | 2.48559644  | 2.03692692  | 1.16252135  |
| N | 1.05086181  | -0.33094781 | -0.27460027 | H  | 1.46984077  | 2.25967263  | 1.24852018  |

Table S3r: Optimized XYZ coordinates for complex **23**

|    |             |             |             |    |             |             |             |
|----|-------------|-------------|-------------|----|-------------|-------------|-------------|
| C  | 1.87496404  | -0.60190163 | -2.84045499 | C  | 6.34166503  | -1.33049086 | -1.43474906 |
| C  | 2.37679350  | -1.20188641 | -4.00285212 | H  | 4.94781345  | -1.72698848 | 0.17115372  |
| C  | 2.94830593  | -0.39611070 | -4.99674691 | C  | 6.88080236  | -0.36487562 | -2.29219412 |
| C  | 3.00806001  | 0.99346169  | -4.82834700 | H  | 6.85842743  | 1.72026808  | -2.86985716 |
| C  | 2.50273432  | 1.56796178  | -3.65443611 | H  | 6.67187632  | -2.37004357 | -1.50337096 |
| H  | 2.30989884  | -2.28437499 | -4.12529188 | H  | 7.63536005  | -0.64593091 | -3.03071520 |
| H  | 3.34219865  | -0.85125609 | -5.90675350 | O  | 3.07756409  | 1.79654881  | 0.17337395  |
| H  | 3.44113067  | 1.63416646  | -5.59866233 | Cl | -0.95072810 | 1.79567848  | -1.84292724 |
| C  | 2.48112038  | 2.95696954  | -3.26458246 | C  | 4.62736547  | 1.24251298  | 1.95543488  |
| H  | 2.90209472  | 3.72736468  | -3.91634480 | H  | 5.43970796  | 0.53541400  | 2.19354446  |
| C  | 1.17999484  | -1.21435374 | -1.73465228 | H  | 5.10748565  | 2.21123449  | 1.73533296  |
| H  | 0.91531435  | -2.27508869 | -1.77235282 | C  | 3.68515879  | 1.37595246  | 3.16755765  |
| C  | 1.92397409  | 4.62322887  | -1.56829127 | H  | 3.24865024  | 0.38357754  | 3.38652469  |
| H  | 2.20349482  | 4.50791700  | -0.50641838 | H  | 2.84389062  | 2.04372060  | 2.92132598  |
| C  | 0.47546359  | 5.13201508  | -1.61007842 | C  | 4.37383091  | 1.90594483  | 4.40761124  |
| H  | -0.19601987 | 4.41541530  | -1.12082581 | C  | 4.04838412  | 3.17135837  | 4.92320481  |
| H  | 0.41038282  | 6.10205940  | -1.09331159 | C  | 5.35663117  | 1.14724898  | 5.06857788  |
| H  | 0.14065013  | 5.26369611  | -2.65109232 | C  | 4.69111721  | 3.66796964  | 6.06324021  |
| C  | 2.89732512  | 5.59413170  | -2.24180227 | H  | 3.27190569  | 3.76667806  | 4.43362133  |
| H  | 3.92982065  | 5.21092744  | -2.23882147 | C  | 6.00107256  | 1.64073298  | 6.20680516  |
| H  | 2.60697067  | 5.82180332  | -3.28052511 | H  | 5.61572011  | 0.15332810  | 4.69042482  |
| H  | 2.89037335  | 6.54560662  | -1.68957635 | C  | 5.67136952  | 2.90621017  | 6.70748977  |
| C  | -0.06773484 | -0.97963676 | 0.32681616  | H  | 4.41863717  | 4.65280276  | 6.45095892  |
| H  | -0.73321673 | -0.13167820 | 0.55758147  | H  | 6.76011687  | 1.03447834  | 6.70775743  |
| C  | -0.94638289 | -2.15980770 | -0.10258323 | H  | 6.17273014  | 3.29243438  | 7.59818296  |
| H  | -0.37068939 | -3.08921456 | -0.24313474 | H  | 3.31817075  | -0.14120237 | 0.91994018  |
| H  | -1.68782974 | -2.35691209 | 0.68620670  | O  | 1.02461174  | 2.69962248  | 0.78987314  |
| H  | -1.49030104 | -1.92978279 | -1.03047203 | C  | 0.05425078  | 2.45257181  | 1.78218869  |
| C  | 0.75674417  | -1.31629773 | 1.57675910  | H  | -0.95062301 | 2.56851572  | 1.32770910  |
| H  | 1.44770529  | -2.15049034 | 1.37247624  | H  | 0.10167753  | 1.41347049  | 2.17353001  |
| H  | 1.34429062  | -0.45092814 | 1.91326884  | C  | 0.18423154  | 3.40686425  | 2.95921730  |
| H  | 0.08962988  | -1.61704572 | 2.39893851  | C  | -0.24405991 | 3.02355661  | 4.24060627  |
| N  | 1.96410550  | 3.24135518  | -2.08691183 | C  | 0.71882576  | 4.69327551  | 2.78564853  |
| N  | 1.96490804  | 0.75962165  | -2.67766231 | C  | -0.15139290 | 3.90567144  | 5.32222069  |
| N  | 0.81649017  | -0.43794366 | -0.73513815 | H  | -0.64935267 | 2.01813790  | 4.39365326  |
| Ru | 1.29873957  | 1.58317389  | -1.06836876 | C  | 0.81589114  | 5.57725928  | 3.86634692  |
| C  | 3.92284947  | 0.75345017  | 0.67276971  | H  | 1.06306373  | 4.98422762  | 1.79112691  |
| C  | 4.93248672  | 0.36141243  | -0.39147954 | C  | 0.37996151  | 5.18775140  | 5.13865057  |
| C  | 5.47639765  | 1.32312896  | -1.25720475 | H  | -0.48406698 | 3.58774300  | 6.31349316  |
| C  | 5.37241168  | -0.96754180 | -0.49323079 | H  | 1.23323065  | 6.57636610  | 3.71463541  |
| C  | 6.44325061  | 0.96190368  | -2.20099320 | H  | 0.45769417  | 5.87674108  | 5.98314786  |
| H  | 5.11964705  | 2.35283625  | -1.18861855 | H  | 2.26357816  | 2.22505350  | 0.83891733  |



Table S3s: Optimized XYZ coordinates for complex **16'**

|   |             |             |             |    |             |             |             |
|---|-------------|-------------|-------------|----|-------------|-------------|-------------|
| C | -1.10029000 | -0.61966000 | -2.00259000 | N  | 1.15241000  | 0.06604000  | -2.15129000 |
| C | -2.43098000 | -0.81751000 | -2.39607000 | Ru | 1.19067000  | -0.83397000 | -0.27336000 |
| C | -3.29507000 | -1.53564000 | -1.56171000 | H  | -0.51327000 | 1.94614000  | 2.30627000  |
| C | -2.82264000 | -2.07214000 | -0.35723000 | C  | 2.75814000  | 2.59149000  | 0.99944000  |
| C | -1.48457000 | -1.86274000 | 0.00603000  | C  | 3.45014000  | 3.73150000  | 0.57963000  |
| H | -2.77532000 | -0.40884000 | -3.34717000 | C  | 2.91679000  | 4.54389000  | -0.42732000 |
| H | -4.33473000 | -1.68910000 | -1.85522000 | C  | 1.68672000  | 4.19570000  | -0.99889000 |
| H | -3.47398000 | -2.65600000 | 0.29502000  | C  | 0.99908000  | 3.05136000  | -0.58167000 |
| C | -0.76848000 | -2.40374000 | 1.13251000  | C  | 1.52036000  | 2.21518000  | 0.43023000  |
| H | -1.24853000 | -3.12516000 | 1.79842000  | H  | 3.18607000  | 1.96930000  | 1.79286000  |
| C | -0.04025000 | 0.03051000  | -2.71545000 | H  | 4.40534000  | 3.98851000  | 1.04528000  |
| H | -0.20213000 | 0.43646000  | -3.71997000 | H  | 3.45015000  | 5.43805000  | -0.75864000 |
| C | 1.35571000  | -2.75758000 | 2.25640000  | H  | 1.25408000  | 4.82426000  | -1.78239000 |
| H | 2.21471000  | -3.08721000 | 1.64431000  | H  | 0.04654000  | 2.78705000  | -1.04068000 |
| C | 0.73418000  | -3.99619000 | 2.90724000  | C  | 0.84523000  | 0.96976000  | 0.93702000  |
| H | 0.38957000  | -4.72081000 | 2.15466000  | C  | -0.56471000 | 1.15234000  | 1.52947000  |
| H | 1.50016000  | -4.49240000 | 3.52112000  | H  | -0.82503000 | 0.23849000  | 2.09404000  |
| H | -0.10559000 | -3.74427000 | 3.57616000  | C  | -1.78558000 | 1.49941000  | 0.69261000  |
| C | 1.85258000  | -1.76487000 | 3.31561000  | C  | -3.11371000 | 1.58229000  | 1.41242000  |
| H | 2.36391000  | -0.90781000 | 2.85615000  | C  | -3.26713000 | 1.38300000  | 2.79788000  |
| H | 1.01447000  | -1.38524000 | 3.92216000  | C  | -4.25346000 | 1.87938000  | 0.64133000  |
| H | 2.56509000  | -2.26473000 | 3.98861000  | C  | -4.52900000 | 1.47710000  | 3.39317000  |
| C | 2.25159000  | 0.54231000  | -3.04801000 | H  | -2.40105000 | 1.15874000  | 3.42307000  |
| H | 1.85639000  | 1.43358000  | -3.57092000 | C  | -5.51236000 | 1.97156000  | 1.23423000  |
| C | 3.50854000  | 0.95133000  | -2.28863000 | H  | -4.11413000 | 2.03502000  | -0.43039000 |
| H | 4.00514000  | 0.06766000  | -1.85786000 | C  | -5.65382000 | 1.77004000  | 2.61382000  |
| H | 4.21489000  | 1.41571000  | -2.99414000 | H  | -4.63442000 | 1.32387000  | 4.46979000  |
| H | 3.29335000  | 1.67868000  | -1.49572000 | H  | -6.38794000 | 2.20362000  | 0.62308000  |
| C | 2.56909000  | -0.55701000 | -4.07692000 | H  | -6.63875000 | 1.84400000  | 3.08116000  |
| H | 2.85644000  | -1.48206000 | -3.55469000 | O  | -1.74935000 | 1.72147000  | -0.51499000 |
| H | 1.70068000  | -0.77919000 | -4.71500000 | Cl | 2.20040000  | -2.92214000 | -1.23983000 |
| H | 3.39920000  | -0.23138000 | -4.72278000 | H  | 1.43159000  | 0.66318000  | 1.81955000  |
| N | 0.49811000  | -2.06522000 | 1.26271000  | H  | 2.88498000  | -0.30676000 | -0.14569000 |
| N | -0.66021000 | -1.11651000 | -0.80059000 | H  | 2.77480000  | -0.79227000 | 0.54239000  |

Table S3t: Optimized XYZ coordinates for complex **12'**

|   |             |             |             |    |             |             |             |
|---|-------------|-------------|-------------|----|-------------|-------------|-------------|
| C | -1.99173000 | -2.09421000 | -1.20158000 | N  | 0.06547000  | -2.59009000 | -0.11472000 |
| C | -3.11810000 | -2.34007000 | -1.99456000 | Ru | -0.21460000 | -0.59221000 | 0.60326000  |
| C | -4.15103000 | -1.38429000 | -2.00904000 | C  | 0.94812000  | 0.99092000  | -0.70063000 |
| C | -4.05934000 | -0.22953000 | -1.22408000 | C  | -0.02664000 | 1.95371000  | -1.31203000 |
| C | -2.90247000 | -0.02606000 | -0.45128000 | C  | -0.08765000 | 3.31012000  | -0.93252000 |
| H | -3.19818000 | -3.26065000 | -2.57617000 | C  | -0.84742000 | 1.52308000  | -2.37267000 |
| H | -5.04009000 | -1.55771000 | -2.61794000 | C  | -0.95852000 | 4.19649000  | -1.57203000 |
| H | -4.87276000 | 0.49843000  | -1.20091000 | H  | 0.55571000  | 3.68159000  | -0.13296000 |
| C | -2.64500000 | 0.99692000  | 0.53726000  | C  | -1.71282000 | 2.41047000  | -3.01638000 |
| H | -3.42485000 | 1.72131000  | 0.78383000  | H  | -0.77175000 | 0.48204000  | -2.69163000 |
| C | -0.86812000 | -2.98453000 | -0.93510000 | C  | -1.77806000 | 3.75090000  | -2.61645000 |
| H | -0.86108000 | -3.99118000 | -1.36913000 | H  | -0.98961000 | 5.24354000  | -1.26023000 |
| C | -1.40663000 | 1.68420000  | 2.50443000  | H  | -2.33306000 | 2.05573000  | -3.84361000 |
| H | -1.47493000 | 0.85946000  | 3.24017000  | H  | -2.45194000 | 4.44619000  | -3.12264000 |
| C | -2.52904000 | 2.68867000  | 2.78267000  | Cl | -0.93080000 | -1.68369000 | 2.61836000  |
| H | -3.52029000 | 2.21460000  | 2.84460000  | C  | 2.23989000  | 1.59637000  | -0.14560000 |
| H | -2.33773000 | 3.16662000  | 3.75444000  | H  | 2.56541000  | 2.36759000  | -0.87011000 |
| H | -2.56122000 | 3.48511000  | 2.02059000  | H  | 2.04179000  | 2.14095000  | 0.78985000  |
| C | -0.02720000 | 2.31971000  | 2.67214000  | C  | 3.38675000  | 0.59706000  | 0.06393000  |
| H | 0.74909000  | 1.57110000  | 2.46149000  | H  | 3.61263000  | 0.10271000  | -0.89434000 |
| H | 0.10003000  | 3.18425000  | 2.00270000  | H  | 3.04284000  | -0.18397000 | 0.76054000  |
| H | 0.09181000  | 2.66972000  | 3.70848000  | C  | 4.62644000  | 1.27272000  | 0.60507000  |
| C | 1.16084000  | -3.49346000 | 0.29954000  | C  | 5.60965000  | 1.78602000  | -0.25816000 |
| H | 1.34330000  | -3.20184000 | 1.34626000  | C  | 4.80955000  | 1.43169000  | 1.99022000  |
| C | 0.80852000  | -4.98366000 | 0.26062000  | C  | 6.74022000  | 2.43991000  | 0.24379000  |
| H | 0.71028000  | -5.36888000 | -0.76766000 | H  | 5.48799000  | 1.66363000  | -1.33894000 |
| H | 1.62011000  | -5.55173000 | 0.73921000  | C  | 5.93793000  | 2.08475000  | 2.49703000  |
| H | -0.12100000 | -5.18969000 | 0.81241000  | H  | 4.05868000  | 1.02851000  | 2.67658000  |
| C | 2.41423000  | -3.17276000 | -0.52827000 | C  | 6.90771000  | 2.59259000  | 1.62467000  |
| H | 2.27747000  | -3.49567000 | -1.57320000 | H  | 7.49528000  | 2.82691000  | -0.44530000 |
| H | 2.61075000  | -2.09402000 | -0.52512000 | H  | 6.06392000  | 2.19191000  | 3.57745000  |
| H | 3.28302000  | -3.70298000 | -0.10977000 | H  | 7.79162000  | 3.09944000  | 2.01912000  |
| N | -1.51451000 | 0.94588000  | 1.21616000  | O  | 0.94939000  | -0.22936000 | -1.14584000 |
| N | -1.89431000 | -0.93905000 | -0.49164000 | H  | 1.13273000  | -0.37874000 | 1.49620000  |

## 7. References

1. (a) W. L. F. Armarego, C. Chai, Chapter 4 - Purification of Organic Chemicals. In *Purification of Laboratory Chemicals (Seventh Edition)*, W. L. F. Armarego, C. Chai, Butterworth-Heinemann: Boston, **2013**; pp 103-554; (b) W. L. F. Armarego, C. Chai, Chapter 5 - Purification of Inorganic and Metal-Organic Chemicals. In *Purification of Laboratory Chemicals (Seventh Edition)*, W. L. F. Armarego, C. Chai, Eds. Butterworth-Heinemann: Boston, **2013**; pp 555-661.
2. G. M. Sheldrick, *Acta Cryst.* 2015, **71**, 3-8.
3. J. P. Perdew, K. Burke, M. Ernzerhof, *Phys. Rev. Letters* 1996, **77**, 3865-3868.
4. R. C. Gaussian 16, M. J. Frisch, G. W. Trucks, H. B. Schlegel, G. E. Scuseria, M. A. Robb, J. R. Cheeseman, G. Scalmani, V. Barone, G. A. Petersson, H. Nakatsuji, X. Li, M. Caricato, A. V. Marenich, J. Bloino, B. G. Janesko, R. Gomperts, B. Mennucci, H. P. Hratchian, J. V. Ortiz, A. F. Izmaylov, J. L. Sonnenberg, D. Williams-Young, F. Ding, F. Lipparini, F. Egidi, J. Goings, B. Peng, A. Petrone, T. Henderson, D. Ranasinghe, V. G. Zakrzewski, J. Gao, N. Rega, G. Zheng, W. Liang, M. Hada, M. Ehara, K. Toyota, R. Fukuda, J. Hasegawa, M. Ishida, T. Nakajima, Y. Honda, O. Kitao, H. Nakai, T. Vreven, K. Throssell, J. A. Montgomery, Jr., J. E. Peralta, F. Ogliaro, M. J. Bearpark, J. J. Heyd, E. N. Brothers, K. N. Kudin, V. N. Staroverov, T. A. Keith, R. Kobayashi, J. Normand, K. Raghavachari, A. P. Rendell, J. C. Burant, S. S. Iyengar, J. Tomasi, M. Cossi, J. M. Millam, M. Klene, C. Adamo, R. Cammi, J. W. Ochterski, R. L. Martin, K. Morokuma, O. Farkas, J. B. Foresman, and D. J. Fox, Gaussian 16, Revision C.01; Gaussian, Inc., Wallingford CT, **2016**.
5. P. J. Hay, W. R. Wadt, *J. Chem. Phys.* 1985, **82**, 270-283.
6. W. R. Wadt, P. J. Hay, *J. Chem. Phys.* 1985, **82**, 284-298.
7. P. J. Hay, W. R. Wadt, *J. Chem. Phys.* 1985, **82**, 299-310.
